# Supplementary material for: DJ-1 suppresses ferroptosis through preserving the activity of S-adenosyl homocysteine hydrolase
Source: PubMed Central journal article supplement (PMC7060199; doi:10.1038/s41467-020-15109-y), 2020-03-06
Supplement: 41467_2020_15109_MOESM1_ESM.pdf [file 41467_2020_15109_MOESM1_ESM.pdf]

**DJ-1 Suppresses Ferroptosis Through Preserving The Activity of S-adenosyl  
Homocysteine Hydrolase**

Cao et al.

## Supplementary Figure 1

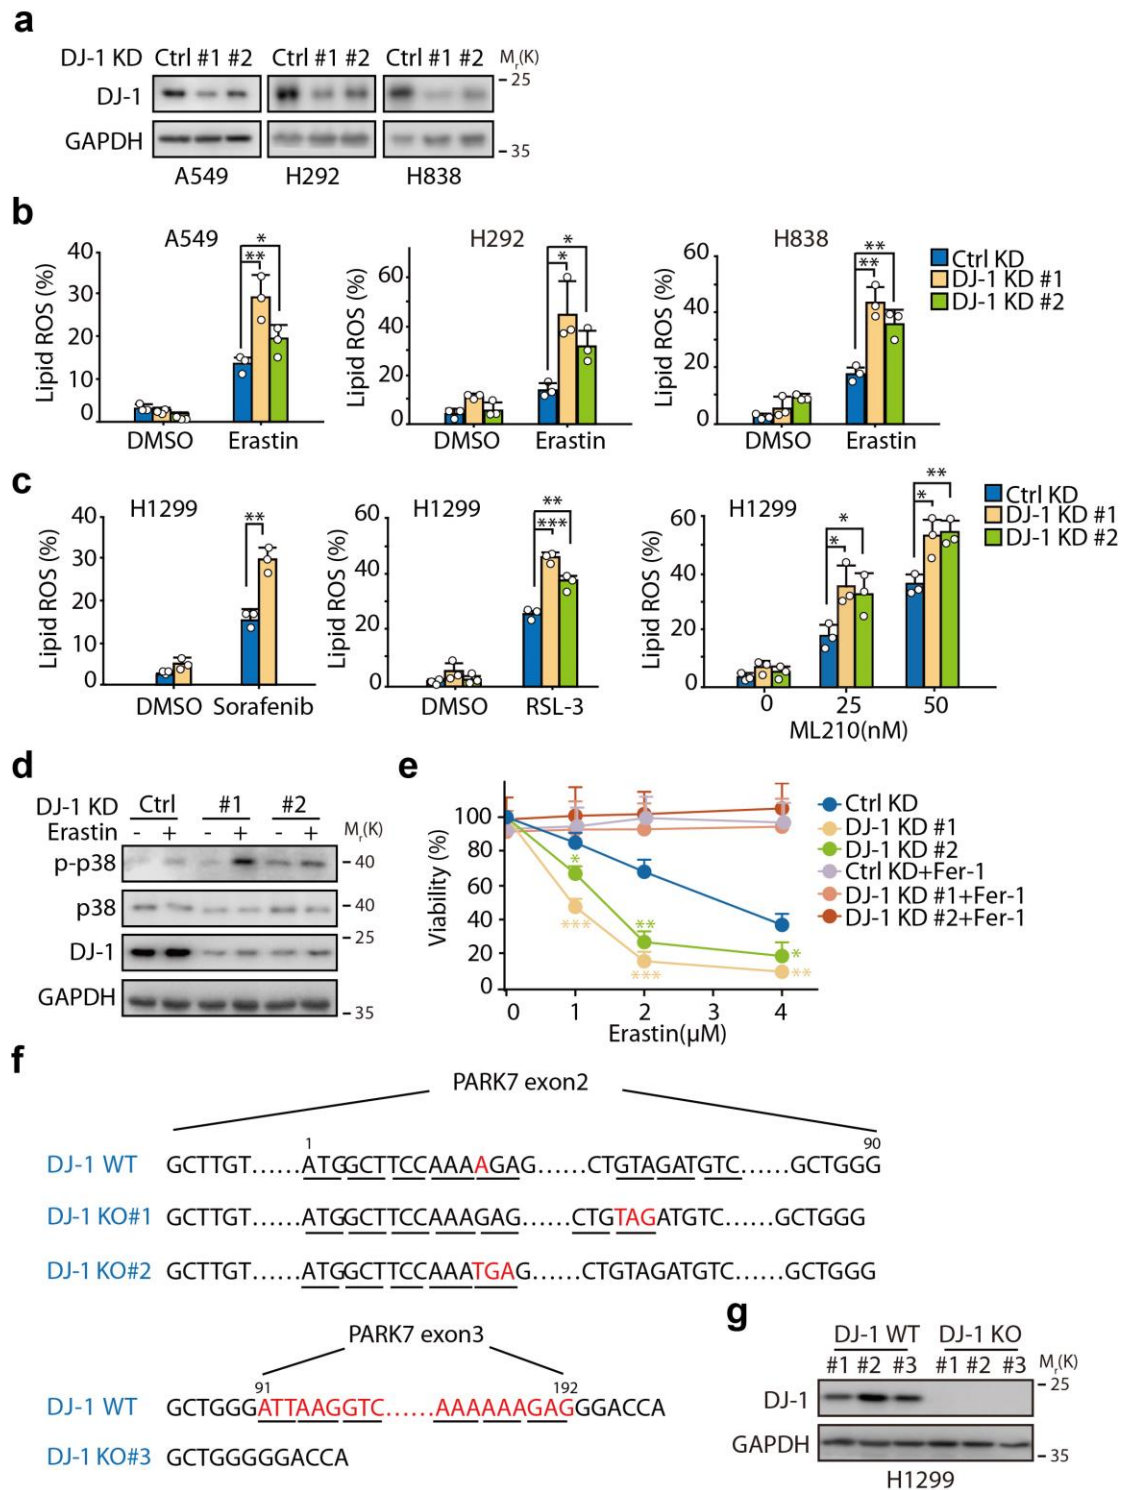

**Supplementary Figure 1. a** Western blot analysis of DJ-1 expression in indicated DJ-1

knockdown A549, H292 and H838 cells. Independent experiments are repeated

three times and representative data are shown. **b** Indicated DJ-1 knockdown A549 (the

left view), H292 (the middle view), and H838 (the right view) cells were treated with Erastin (4  $\mu$ M, 5  $\mu$ M, 2.5  $\mu$ M) for 24 h or 36 h, respectively, and lipid ROS production was assayed by flow cytometry using C11-BODIPY. **c** Indicated DJ-1 knockdown H1299 cells were treated with Sorafenib (5  $\mu$ M) (the left view), RSL3 (50 nM) (the middle view), ML210 (25  $\mu$ M, 50  $\mu$ M) (the right view) for 12h, and lipid ROS production was assayed. **d** Indicated DJ-1 knockdown H1299 cells were treated with Erastin (2  $\mu$ M) for 12 h and subjected to western blot analysis of the indicated proteins in whole cell extracts. The experiments were performed for triplicate and representative data are shown. **e** Cell viability was assayed in indicated DJ-1 knockdown H1299 cells treated for 36 h with Erastin (1-4  $\mu$ M) with or without Fer-1 (1  $\mu$ M). **f** The sequencing result of DJ-1 in H1299 KO cells mediated by CRISPR/Cas9. **g** Western blot analysis of DJ-1 expression in indicated DJ-1 WT and KO H1299 cells mediated by CRISPR/Cas9. Independent experiments are repeated three times and representative data are shown. Data shown represent mean  $\pm$  SD from three independent experiments. Comparisons were made using the two-tailed, unpaired Student's t test. \*:  $p < 0.05$ ; \*\*:  $p < 0.01$ ; \*\*\*:  $p < 0.001$ .

## Supplementary Figure 2

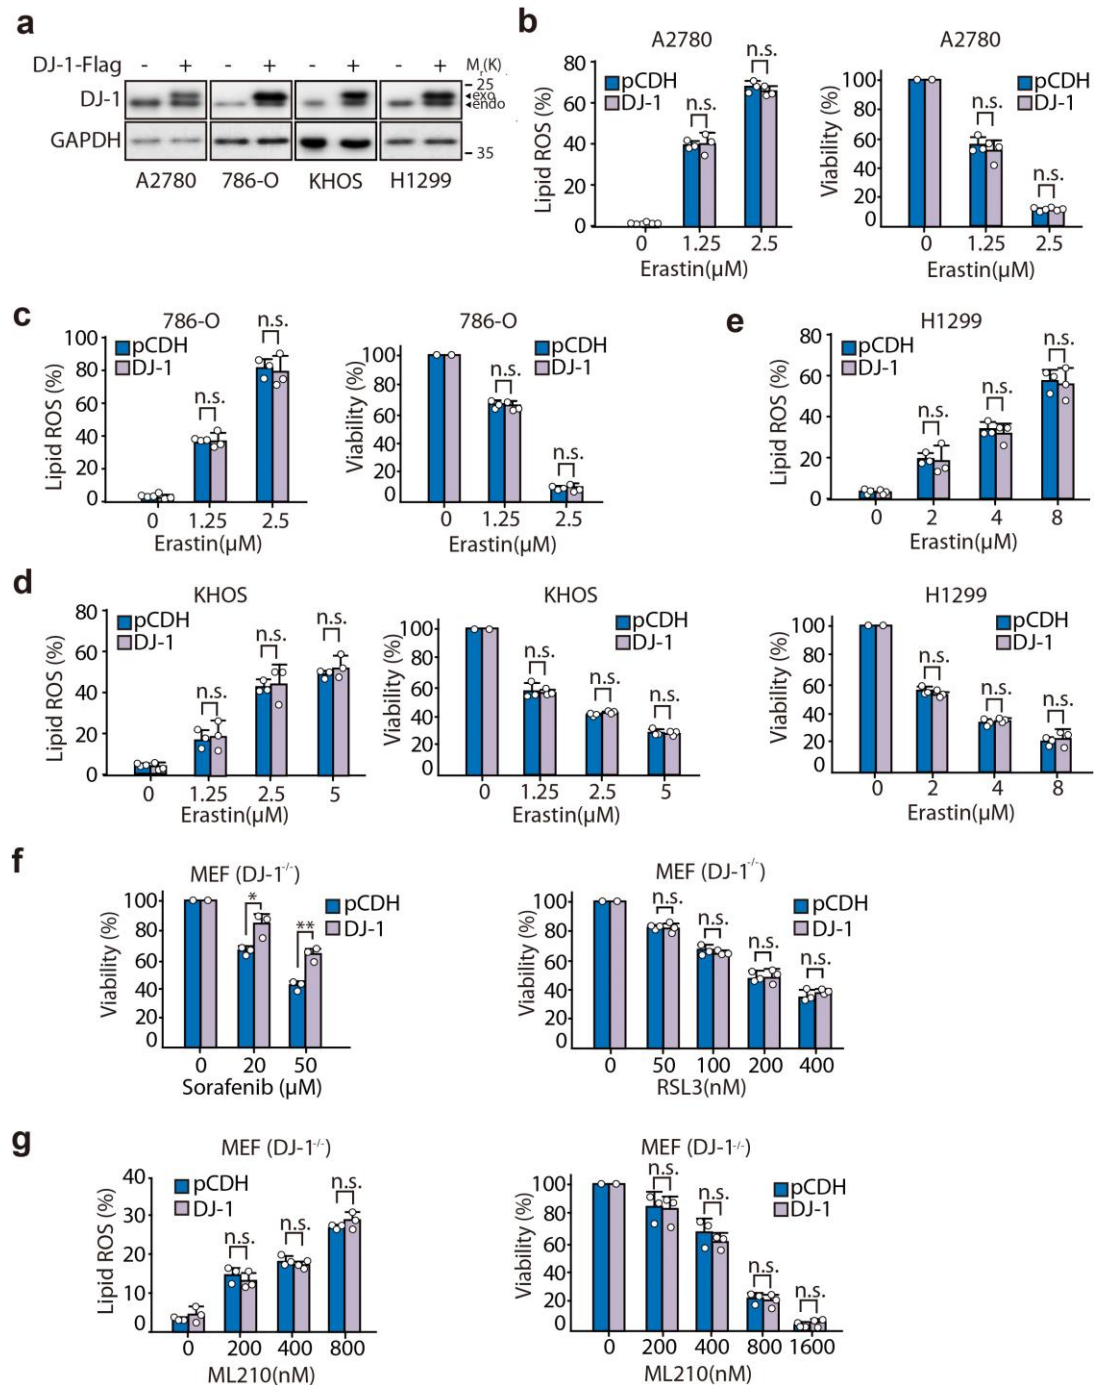

**Supplementary Figure 2.** **a** Western blot analysis of DJ-1 expression in indicated DJ-1 overexpression A2780, 786-O, KHOS and H1299 cells. Independent experiments are repeated three times and representative data are shown. **b-e** Indicated A2780, 786-O, KHOS and H1299 cells were treated with Erastin: 1.25 μM, and 2.5 μM in A2780 cells (**b**), 1.25 μM, and 2.5 μM in 786-O cells (**c**), 1.25-5 μM in KHOS cells (**d**)

and 2-8  $\mu\text{M}$  in H1299 cells (**e**). Lipid ROS production was assayed after 12 h by flow cytometry using C11-BODIPY and cell viability was assayed after 36 h with CCK8. **f** Indicated DJ-1 KO MEFs with DJ-1 re-overexpression were treated with Sorafenib (20 $\mu\text{M}$ , 50  $\mu\text{M}$ ) (the left view) and RSL-3 (50-400 nM) (the right view) for 24 h, and cell viability was determined. **g** Indicated DJ-1 KO MEFs with DJ-1 re-overexpression were treated with ML210 (200-800 nM or 200-1600 nM). Lipid ROS production (the left view) was assayed after 12 h by flow cytometry using C11-BODIPY and cell viability (the right view) was assayed after 36 h with CCK8. Data shown represent mean  $\pm$  SD from three independent experiments. Comparisons were made using the two-tailed, unpaired Student's t test. \*:  $p < 0.05$ ; \*\*:  $p < 0.01$ ; n.s.: no statistic difference.

### Supplementary Figure 3

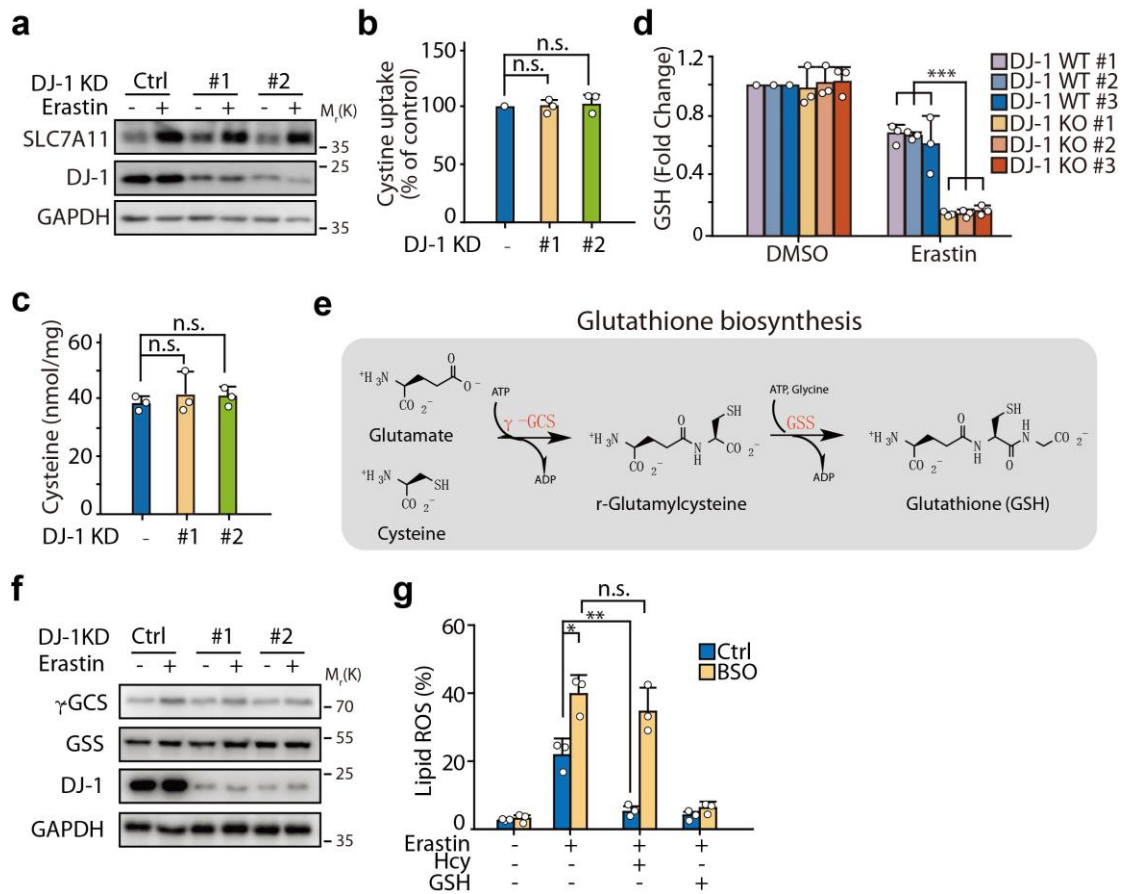

**Supplementary Figure 3.** **a** Indicated DJ-1 knockdown H1299 cells were treated with Erastin (2  $\mu$ M) for 12 h and subjected to western blot analysis of the indicated proteins in whole cell extracts. Independent experiments are repeated three times and representative data are shown. **b**  $\text{Na}^+$ -independent uptake of cystine in indicated H1299 cells are shown. **c** The levels of endocellular cysteine in indicated H1299 cells are shown. **d** Indicated DJ-1 KO H1299 cells were treated with Erastin (2  $\mu$ M) for 6 h and intracellular GSH levels were examined. **e** The schematic representation of glutathione biosynthesis. Gamma-glutamylcysteine synthetase ( $\gamma$ -GCS) and glutathione synthetase (GSS) are two important rate-limiting enzymes of glutathione synthesis. **f** Indicated DJ-1 knockdown H1299 cells were treated with Erastin (2  $\mu$ M) for 12 h and subjected to western blot analysis of the indicated proteins in whole cell

extracts. Independent experiments are repeated three times and representative data are shown. **g** H1299 cells were treated Erastin (2  $\mu$ M) with BSO (pretreated 4 h, 100  $\mu$ M) with or without GSH (0.5 mM) and Hcy (0.5 mM) for another 12 h, and lipid ROS production was assayed by flow cytometry using C11-BODIPY. Data shown represent mean  $\pm$  SD from three independent experiments. Comparisons were made using the two-tailed, unpaired Student's t test. \*:  $p < 0.05$ ; \*\*:  $p < 0.01$ ; \*\*\*:  $p < 0.001$ ; n.s.: no statistic difference.

## Supplementary Figure 4

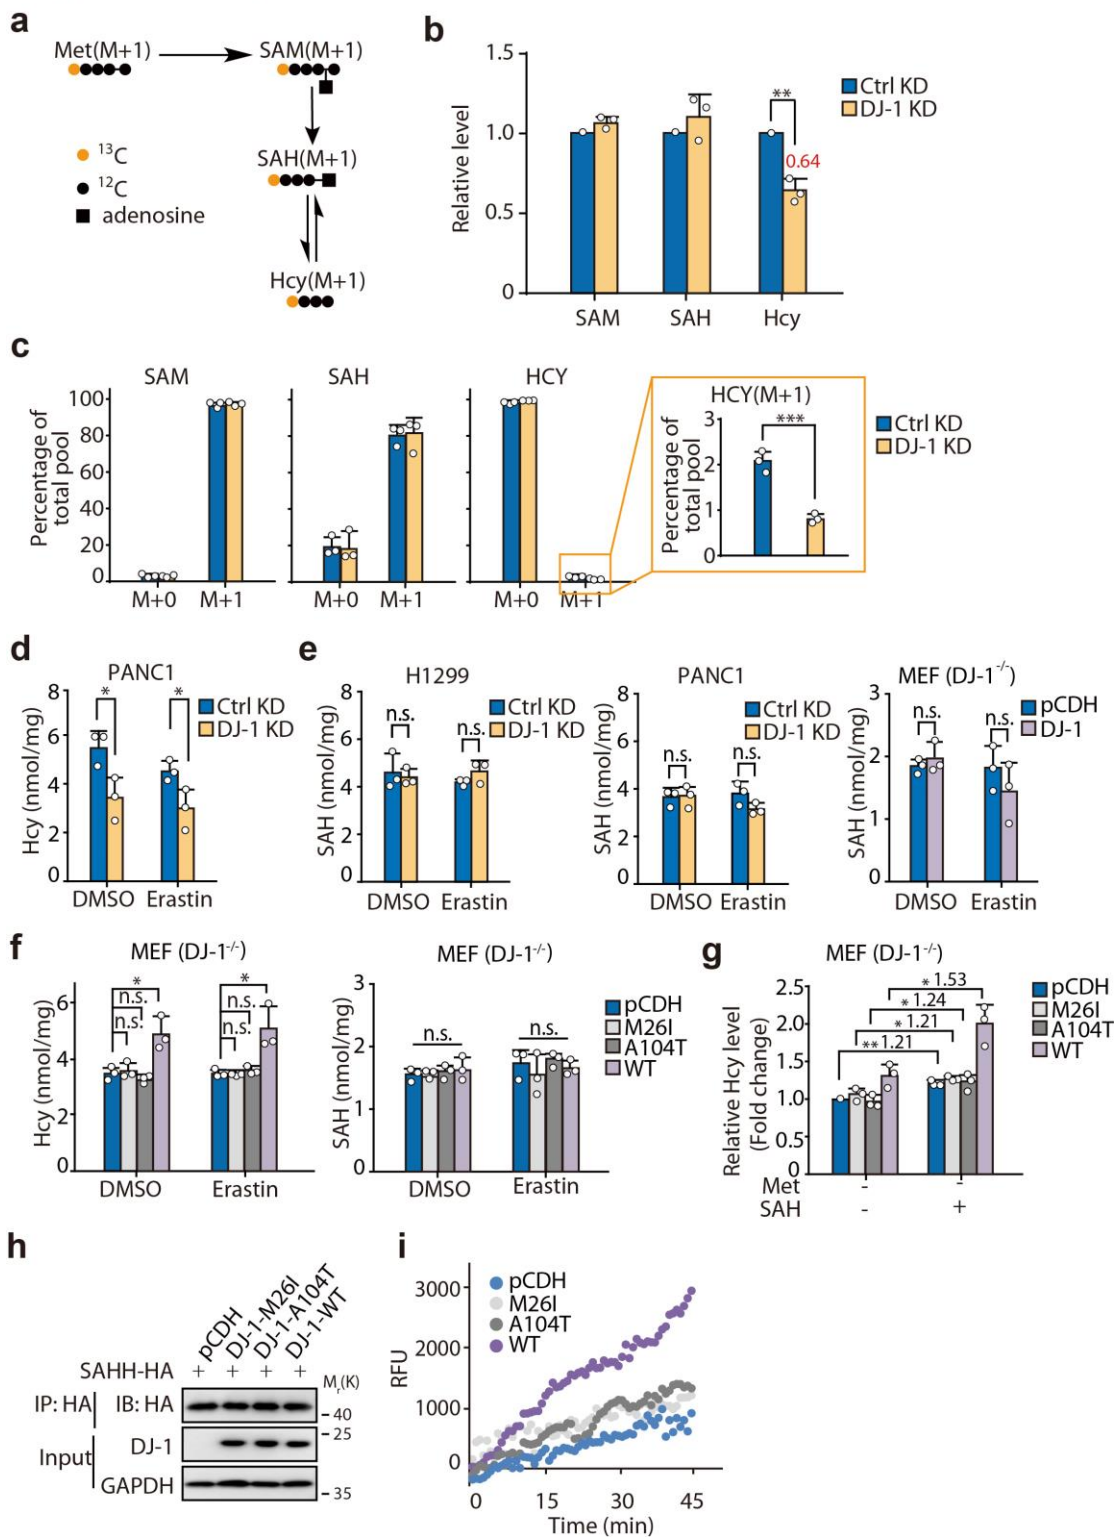

**Supplementary Figure 4. a** Outline of carbon flux in metabolic pathways leading from labeled  $^{13}\text{C}$ -Met (yellow) to Hcy via transsulfuration. **b** Relative metabolite level (all isotopologues) determined by mass spectrometry.  $^{13}\text{C}$ -Met was added only during the



4 h treatment phase. **c** Isotopologues of SAM, SAH, Hcy detected in the experiment outlined in **(b)**. **d** PANC1 cells were infected with shRNAs for 72 h (#1 sequence of DJ-1 knockdown was used here), and the levels of endocellular Hcy were assayed after treated with Erastin (2  $\mu$ M) for 12 h by ELISA assays. **e** ELISA assays for the levels of endocellular SAH after treated with Erastin for 12 h. The SAH levels in indicated H1299 cells (Erastin 2  $\mu$ M, the left view), PANC1 cells (Erastin 2  $\mu$ M, the middle view) and MEFs (Erastin 400 nM, the right view) are shown. **f, g** Indicated DJ-1 KO MEFs were transfected with different DJ-1 mutations. **f** The Hcy levels (the left view) and the SAH (the right view) levels in indicated MEFs treated with Erastin (400 nM) for 12 h are shown. **g** Indicated cells were deprived from Met for 24 h, followed by adding the extra SAH to the cells for 4 h, and Hcy levels we detected by ELISA. The relative Hcy levels are shown. **h, i** Indicated HEK293T cells with different DJ-1 mutations overexpression were further transfected with SAHH-HA plasmids. **h** Cell lysates were immunoprecipitated with anti-HA antibody, followed by immunoblotting with anti-HA antibody. Independent experiments are repeated three times and representative data are shown. **i** The activity of ectopic SAHH from indicated cells by immunoprecipitation was assayed as mentioned in methods. Independent experiments were repeated three times and representative data are shown. Wildtype DJ-1 was used here for positive control. Data shown represent mean  $\pm$  SD from three independent experiments. Comparisons were made using the two-tailed, unpaired Student's t test. \*:  $p < 0.05$ ; \*\*:  $p < 0.01$ ; \*\*\*:  $p < 0.001$ ; n.s.: no statistic difference.

## Supplementary Figure 5

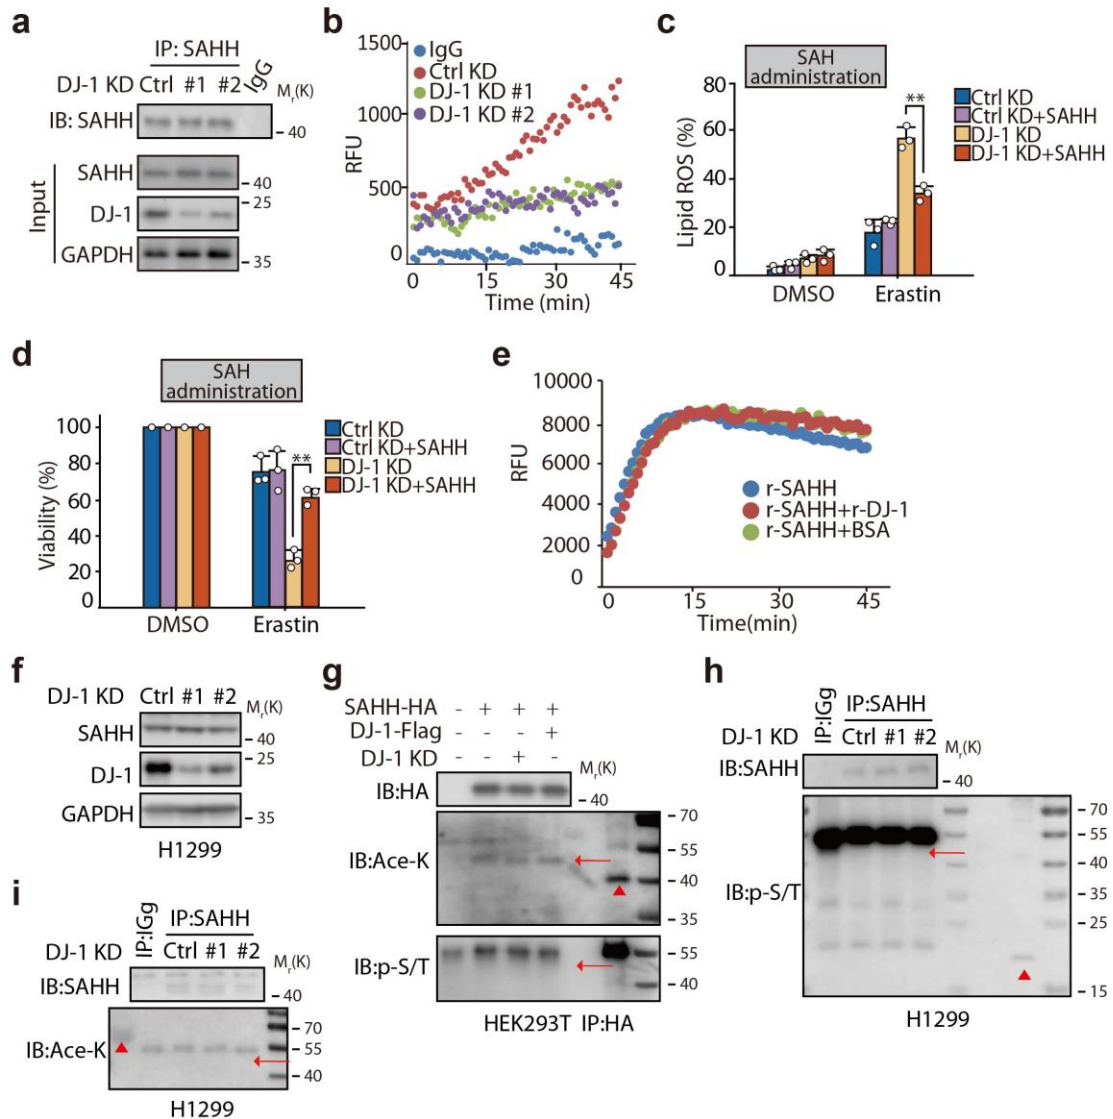

**Supplementary Figure 5.** **a** Cell lysates of indicated DJ-1 knockdown H1299 cells were immunoprecipitated with anti-SAHH antibody, followed by immunoblotting with anti-SAHH antibody. Independent experiments are repeated three times and representative data are shown. **b** The intracellular enzymatic activity of SAHH are shown. Independent experiments are repeated three times and representative data are shown. **c, d** Indicated DJ-1 knockdown H1299 cells were further transfected with SAHH-HA plasmids and treated with Erastin (2  $\mu$ M) and SAH (0.5 mM) for 12 or 36 h, and lipid ROS production (**c**) and cell viability (**d**) were assayed. **e** The recombinant

SAHH was pre-incubated with recombinant DJ-1 or BSA for 1h and subsequently the activity was assayed as mentioned in methods. Independent experiments were repeated three times and representative data are shown. **f-i** DJ-1 did not influence the expression and post-translational modification of SAHH. Independent experiments are repeated three times and representative data are shown. **f** The protein level of SAHH in indicated DJ-1 knockdown H1299 cells was analyzed by western blot. The acetylation modification in exogenous SAHH (**g**) and in endogenous SAHH (**i**) were assayed in indicated cells; and the phosphorylation of SAHH was detected both in exogenous (**g**) and endogenous (**h**) SAHH. Red triangle representatives the positive signal which was used for quality control; red arrow indicates the position of the target signal. Data shown represent mean  $\pm$  SD from three independent experiments. Comparisons were made using the two-tailed, unpaired Student's t test. \*\*:  $p < 0.01$ .

## Supplementary Figure 6

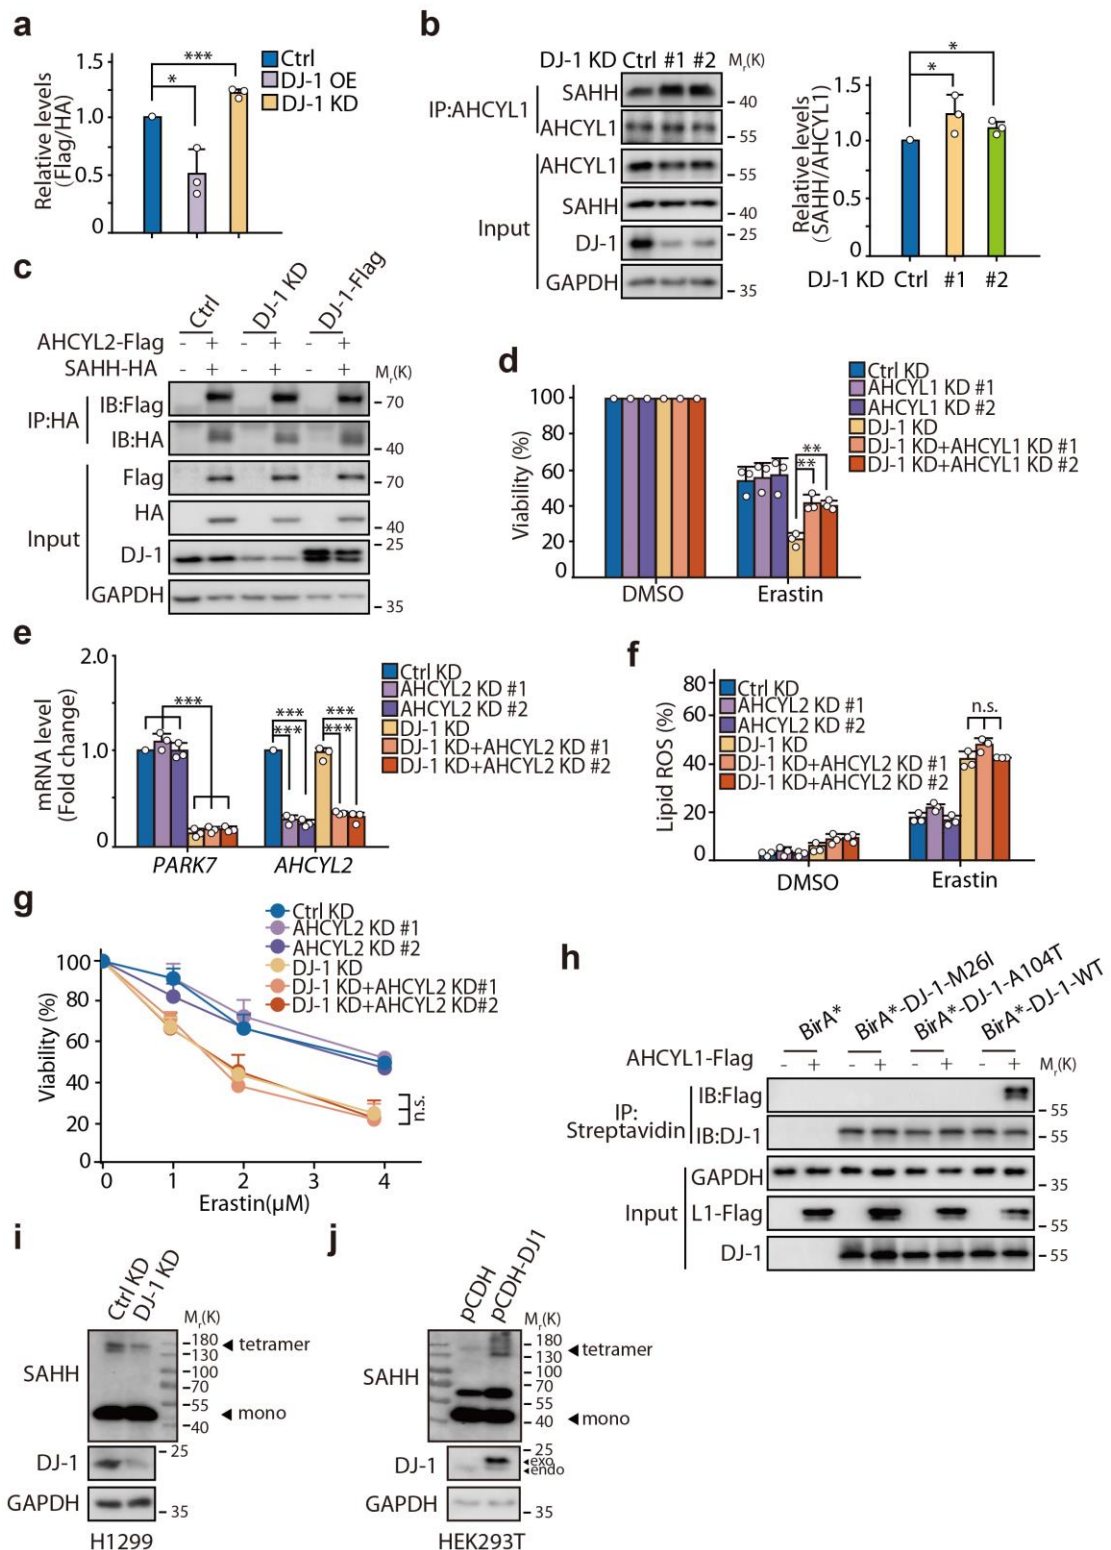

**Supplementary Figure 6. a** Quantitative analysis of the interaction between AHCYL1-SAHH under different DJ-1 level was shown. **b** The interaction between AHCYL1 and SAHH in indicated DJ-1 knockdown H1299 cells was analyzed, and the quantitative

analysis was shown (the right view). **c** The interaction between AHCYL2 and SAHH under different DJ-1 level was analyzed. Indicated HEK293T cells stably expressing AHCYL2 and SAHH were harvested for immunoprecipitation and subjected to immunoblotting with anti-Flag and anti-HA antibodies (#1 sequence of DJ-1 knockdown was used here). Independent experiments are repeated three times and representative data are shown. **d** Indicated DJ-1 knockdown (#1 sequence) and AHCYL1 knockdown H1299 cells were treated with Erastin (2  $\mu$ M) for 36 h, and cell viability was assayed. **e** The mRNA expression of *PARK7* and *AHCYL2* in indicated H1299 cells was assayed by qRT-PCR (#1 sequence of DJ-1 knockdown was used here). The relative gene expression is normalized to  $\beta$ -actin and the error bar indicates the s.d. value from triplicates. **f** Indicated DJ-1 knockdown (#1 sequence) and AHCYL2 knockdown H1299 cells were treated with Erastin (2  $\mu$ M) for 12 h, and lipid ROS production was assayed. **g** Cell viability was assayed in indicated DJ-1 knockdown H1299 cells treated for 36 h with Erastin (1-4  $\mu$ M). **h** The interaction between AHCYL1 and mutant DJ-1 in BirA\* system was analyzed. Wild type DJ-1 was used here for positive control. Independent experiments are repeated three times and representative data are shown. **i** DSS cross-linking assays of SAHH in indicated DJ-1 knockdown H1299 cells (#1 sequence of DJ-1 knockdown was used here). Independent experiments are repeated three times and representative data are shown. **j** DSS cross-linking assays of SAHH in HEK293T cells with DJ-1 overexpression. Independent experiments are repeated three times and representative data are shown. Data shown represent mean  $\pm$  SD from three independent experiments. Comparisons were made

using the two-tailed, unpaired Student's t test. \*:  $p < 0.05$ ; \*\*:  $p < 0.01$ ; \*\*\*:  $p < 0.001$ ;

n.s.: no statistic difference.

## Supplementary Figure 7

**a**

| shRNA   | PE (mg/kg) | Tumor (g)   | Inhibit (%) | T/C  |
|---------|------------|-------------|-------------|------|
| Ctrl    | -          | 1.19 ± 0.18 | /           | /    |
| Ctrl    | 30         | 1.07 ± 0.29 | 9.62        | 0.84 |
| DJ-1 KD | -          | 1.22 ± 0.30 | -2.71       | 1.18 |
| DJ-1 KD | 30         | 0.65 ± 0.17 | 45.49       | 0.36 |

**b**

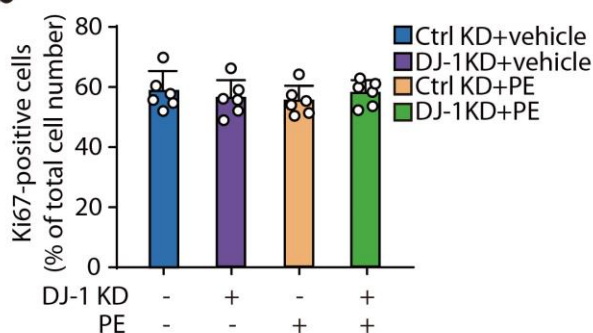

**c**

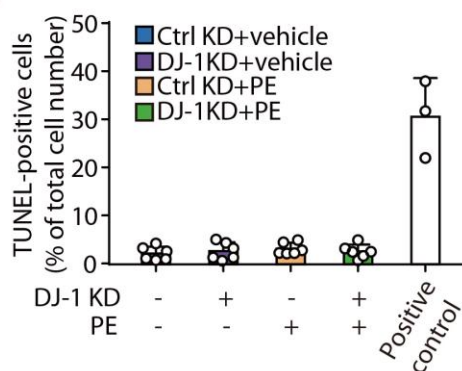

**Supplementary Figure 7. a** The mice were injected subcutaneously with indicated H1299 cells and treated with Piperazine Erastin (PE) (30 mg/kg, once every other day) through tail vein injection for 16 days. At the end of the experiment, the tumors were weighed, and the inhibition rate and T/C value (RTV of treatment/RTV of control) were calculated. n=6 biologically independent samples per group in experimental group. Data shown represent mean ± SEM. **b** Expression of Ki67 was detected in tumor tissues, and the Ki67-positive cells were counted. n=6 biologically independent samples per group in experimental group. Data shown represent mean ± SD. **c** TUNEL assay was performed, and the TUNEL-positive cells were counted. n=6 biologically independent samples per group in experimental group, n=3 biologically independent

samples in positive control group. Data shown represent mean  $\pm$  SD.

Supplementary Table 1 . The unique proteins identified in the biotin-treated BirA\*-

## DJ-1 cells by mass spectrometry

| prot_acc              | prot_desc                                                                                                                | prot_score | emPAI | prot_mass | no._spectra |
|-----------------------|--------------------------------------------------------------------------------------------------------------------------|------------|-------|-----------|-------------|
| sp P36873 PP1G_HUMAN  | Serine/threonine-protein phosphatase PP1-gamma catalytic subunit<br>OS=Homo sapiens<br>OX=9606<br>GN=PPP1CC PE=1<br>SV=1 | 411        | 0.38  | 37701     | 4           |
| sp Q13838 DX39B_HUMAN | Spliceosome RNA helicase DDX39B<br>OS=Homo sapiens<br>OX=9606<br>GN=DDX39B PE=1<br>SV=1                                  | 289        | 0.64  | 49416     | 8           |
| sp O43865 AHCYL_HUMAN | S-adenosylhomocysteine hydrolase-like protein<br>OS=Homo sapiens<br>OX=9606<br>GN=AHCYL PE=1<br>SV=1                     | 189        | 0.09  | 67705     | 2           |



|                       |                                                                                                          |     |      |        |   |
|-----------------------|----------------------------------------------------------------------------------------------------------|-----|------|--------|---|
| sp P60033 CD81_HUMAN  | CD81 antigen<br>OS=Homo sapiens<br>OX=9606 GN=CD81<br>PE=1 SV=1                                          | 188 | 0.25 | 26476  | 2 |
| sp Q96QD8 S38A2_HUMAN | Sodium-coupled neutral amino acid transporter 2<br>OS=Homo sapiens<br>OX=9606<br>GN=SLC38A2 PE=1<br>SV=2 | 165 | 0.11 | 56332  | 2 |
| sp O14529 CUX2_HUMAN  | Homeobox protein cut-like 2<br>OS=Homo sapiens<br>OX=9606<br>GN=CUX2 PE=1<br>SV=4                        | 159 | 0.02 | 162091 | 1 |
| sp Q9BYG3 MK67I_HUMAN | MKI67 FHA domain-interacting nucleolar phosphoprotein<br>OS=Homo sapiens<br>OX=9606 GN=NIFK<br>PE=1 SV=1 | 155 | 0.09 | 34372  | 1 |

|                       |                                                                                   |     |      |        |   |
|-----------------------|-----------------------------------------------------------------------------------|-----|------|--------|---|
| sp P53367 ARFP1_HUMAN | Arfaptin-1 OS=Homo sapiens OX=9606 GN=ARFIP1 PE=1 SV=2                            | 151 | 0.24 | 41770  | 3 |
| sp Q9UQL6 HDAC5_HUMAN | Histone deacetylase 5 OS=Homo sapiens OX=9606 GN=HDAC5 PE=1 SV=2                  | 150 | 0.03 | 122700 | 1 |
| sp P50542 PEX5_HUMAN  | Peroxisomal targeting signal 1 receptor OS=Homo sapiens OX=9606 GN=PEX5 PE=1 SV=3 | 143 | 0.04 | 71163  | 1 |
| sp Q96A65 EXOC4_HUMAN | Exocyst complex component 4 OS=Homo sapiens OX=9606 GN=EXOC4 PE=1 SV=1            | 130 | 0.06 | 111170 | 2 |

|                       |                                                                                           |     |      |        |   |
|-----------------------|-------------------------------------------------------------------------------------------|-----|------|--------|---|
| sp Q86U38 NOP9_HUMAN  | Nucleolar protein 9<br>OS=Homo sapiens<br>OX=9606<br>GN=NOP9 PE=1<br>SV=1                 | 122 | 0.04 | 70136  | 1 |
| sp Q9BW27 NUP85_HUMAN | Nuclear pore complex protein<br>Nup85 OS=Homo sapiens<br>OX=9606<br>GN=NUP85 PE=1<br>SV=1 | 121 | 0.13 | 75826  | 3 |
| sp O43592 XPOT_HUMAN  | Exportin-T<br>OS=Homo sapiens<br>OX=9606<br>GN=XPOT PE=1<br>SV=2                          | 115 | 0.06 | 111148 | 2 |
| sp O94832 MYO1D_HUMAN | Unconventional myosin-1d OS=Homo sapiens<br>OX=9606<br>GN=MYO1D PE=1<br>SV=2              | 111 | 0.05 | 116927 | 2 |

|                                   |                                                                                                                                          |     |      |       |   |
|-----------------------------------|------------------------------------------------------------------------------------------------------------------------------------------|-----|------|-------|---|
| sp Q5SN<br>T2 TM20<br>1_HUMA<br>N | Transmembrane<br>protein 201<br>OS=Homo sapiens<br>OX=9606<br>GN=TMEM201<br>PE=1 SV=1                                                    | 111 | 0.04 | 73444 | 1 |
| sp Q8NA<br>72 POC5<br>_HUMA<br>N  | Centrosomal protein<br>POC5 OS=Homo<br>sapiens OX=9606<br>GN=POC5 PE=1<br>SV=2                                                           | 105 | 0.05 | 63711 | 1 |
| sp Q070<br>21 C1QB<br>P_HUM<br>AN | Complement<br>component 1 Q<br>subcomponent-<br>binding protein,<br>mitochondrial<br>OS=Homo sapiens<br>OX=9606<br>GN=C1QBP PE=1<br>SV=1 | 97  | 0.1  | 31742 | 1 |
| sp Q96E<br>39 RMX                 | RNA binding motif<br>protein, X-linked-                                                                                                  | 96  | 0.07 | 42173 | 1 |

|                                   |                                                                                                              |    |      |       |   |
|-----------------------------------|--------------------------------------------------------------------------------------------------------------|----|------|-------|---|
| L1_HUM<br>AN                      | like-1 OS=Homo<br>sapiens OX=9606<br>GN=RBMXL1 PE=1<br>SV=1                                                  |    |      |       |   |
| sp P0DJ<br>J0 SRG2<br>C_HUM<br>AN | SLIT-ROBO Rho<br>GTPase-activating<br>protein 2C<br>OS=Homo sapiens<br>OX=9606<br>GN=SRGAP2C<br>PE=1 SV=1    | 95 | 0.06 | 54077 | 1 |
| sp P313<br>50 RIR2<br>_HUMA<br>N  | Ribonucleoside-<br>diphosphate<br>reductase subunit<br>M2 OS=Homo<br>sapiens OX=9606<br>GN=RRM2 PE=1<br>SV=1 | 93 | 0.07 | 45134 | 1 |
| sp Q9H8<br>H3 MET<br>7A_HUM<br>AN | Methyltransferase-<br>like protein 7A<br>OS=Homo sapiens<br>OX=9606                                          | 92 | 0.11 | 28814 | 1 |

|                       |                                                                                     |    |      |        |   |
|-----------------------|-------------------------------------------------------------------------------------|----|------|--------|---|
|                       | GN=METTL7A<br>PE=1 SV=1                                                             |    |      |        |   |
| sp O95759 TBCD8_HUMAN | TBC1 domain family member 8<br>OS=Homo sapiens<br>OX=9606<br>GN=TBC1D8 PE=1<br>SV=3 | 86 | 0.02 | 132177 | 1 |
| sp P0DOX7 IGK_HUMAN   | Immunoglobulin kappa light chain<br>OS=Homo sapiens<br>OX=9606 PE=1<br>SV=1         | 82 | 0.13 | 23650  | 1 |
| sp Q9UKA4 AKA11_HUMAN | A-kinase anchor protein 11<br>OS=Homo sapiens<br>OX=9606<br>GN=AKAP11 PE=1<br>SV=1  | 81 | 0.01 | 212946 | 1 |
| sp P78406 RAE1        | mRNA export factor<br>OS=Homo sapiens                                               | 80 | 0.08 | 41569  | 1 |

|                                   |                                                                                                                  |    |      |        |   |
|-----------------------------------|------------------------------------------------------------------------------------------------------------------|----|------|--------|---|
| L_HUMA<br>N                       | OX=9606 GN=RAE1<br>PE=1 SV=1                                                                                     |    |      |        |   |
| sp Q9H3<br>S7 PTN2<br>3_HUMA<br>N | Tyrosine-protein<br>phosphatase non-<br>receptor type 23<br>OS=Homo sapiens<br>OX=9606<br>GN=PTPN23 PE=1<br>SV=1 | 79 | 0.02 | 179830 | 1 |
| sp Q145<br>96 NBR1<br>_HUMA<br>N  | Next to BRCA1 gene<br>1 protein OS=Homo<br>sapiens OX=9606<br>GN=NBR1 PE=1<br>SV=3                               | 79 | 0.03 | 108486 | 1 |
| sp P107<br>68 ESTD<br>_HUMA<br>N  | S-formylglutathione<br>hydrolase OS=Homo<br>sapiens OX=9606<br>GN=ESD PE=1<br>SV=2                               | 79 | 0.1  | 31956  | 1 |
| sp P099<br>72 ALDO                | Fructose-<br>biphosphate<br>aldolase C                                                                           | 76 | 0.08 | 39830  | 1 |

|                                   |                                                                                                             |    |      |        |   |
|-----------------------------------|-------------------------------------------------------------------------------------------------------------|----|------|--------|---|
| C_HUM<br>AN                       | OS=Homo sapiens<br>OX=9606<br>GN=ALDOC PE=1<br>SV=2                                                         |    |      |        |   |
| sp Q9H4<br>A3 WNK<br>1_HUMA<br>N  | Serine/threonine-<br>protein kinase<br>WNK1 OS=Homo<br>sapiens OX=9606<br>GN=WNK1 PE=1<br>SV=2              | 76 | 0.01 | 251552 | 1 |
| sp P600<br>59 SC61<br>G_HUM<br>AN | Protein transport<br>protein Sec61<br>subunit gamma<br>OS=Homo sapiens<br>OX=9606<br>GN=SEC61G PE=1<br>SV=1 | 75 | 0.43 | 7793   | 1 |
| sp Q9NR<br>G9 AAA<br>S_HUM<br>AN  | Aladin OS=Homo<br>sapiens OX=9606<br>GN=AAAS PE=1<br>SV=1                                                   | 72 | 0.16 | 60392  | 3 |



|                       |                                                                                                     |    |      |       |   |
|-----------------------|-----------------------------------------------------------------------------------------------------|----|------|-------|---|
| sp Q14166 TTL12_HUMAN | Tubulin--tyrosine<br>ligase-like protein 12<br>OS=Homo sapiens<br>OX=9606<br>GN=TTLL12 PE=1<br>SV=2 | 71 | 0.04 | 75154 | 1 |
| sp Q12996 CSTF3_HUMAN | Cleavage stimulation<br>factor subunit 3<br>OS=Homo sapiens<br>OX=9606<br>GN=CSTF3 PE=1<br>SV=1     | 67 | 0.04 | 83325 | 1 |
| sp P07199 CENPB_HUMAN | Major centromere<br>autoantigen B<br>OS=Homo sapiens<br>OX=9606<br>GN=CENPB PE=1<br>SV=2            | 64 | 0.05 | 65531 | 1 |
| sp Q5HYK7 SH319_HUMAN | SH3 domain-<br>containing protein 19<br>OS=Homo sapiens<br>OX=9606                                  | 62 | 0.04 | 87042 | 1 |

|                                   |                                                                                             |    |      |       |   |
|-----------------------------------|---------------------------------------------------------------------------------------------|----|------|-------|---|
|                                   | GN=SH3D19 PE=1<br>SV=2                                                                      |    |      |       |   |
| sp Q8N3<br>F8 MILK<br>1_HUMA<br>N | MICAL-like protein 1<br>OS=Homo sapiens<br>OX=9606<br>GN=MICALL1 PE=1<br>SV=2               | 61 | 0.03 | 94352 | 1 |
| sp P250<br>98 ARBK<br>1_HUMA<br>N | Beta-adrenergic<br>receptor kinase 1<br>OS=Homo sapiens<br>OX=9606<br>GN=GRK2 PE=1<br>SV=2  | 52 | 0.04 | 80321 | 1 |
| sp O004<br>00 ACAT<br>N_HUM<br>AN | Acetyl-coenzyme A<br>transporter 1<br>OS=Homo sapiens<br>OX=9606<br>GN=SLC33A1 PE=1<br>SV=1 | 52 | 0.1  | 61383 | 2 |
| sp P003<br>87 NB5R                | NADH-cytochrome<br>b5 reductase 3<br>OS=Homo sapiens                                        | 51 | 0.19 | 34441 | 2 |

|                                   |                                                                                           |    |      |       |   |
|-----------------------------------|-------------------------------------------------------------------------------------------|----|------|-------|---|
| 3_HUMA<br>N                       | OX=9606<br>GN=CYB5R3 PE=1<br>SV=3                                                         |    |      |       |   |
| sp Q928<br>79 CELF<br>1_HUMA<br>N | CUGBP Elav-like<br>family member 1<br>OS=Homo sapiens<br>OX=9606<br>GN=CELF1 PE=1<br>SV=2 | 48 | 0.06 | 52429 | 1 |
| sp P094<br>29 HMG<br>B1_HUM<br>AN | High mobility group<br>protein B1<br>OS=Homo sapiens<br>OX=9606<br>GN=HMGB1 PE=1<br>SV=3  | 46 | 0.27 | 25049 | 2 |
| sp Q9UB<br>B4 ATX1<br>0_HUMA<br>N | Ataxin-10 OS=Homo<br>sapiens OX=9606<br>GN=ATXN10 PE=1<br>SV=1                            | 46 | 0.06 | 54196 | 1 |
| sp O007<br>67 ACO                 | Acyl-CoA<br>desaturase<br>OS=Homo sapiens                                                 | 44 | 0.08 | 41667 | 1 |

|                                  |                                                                                                                                  |    |      |        |   |
|----------------------------------|----------------------------------------------------------------------------------------------------------------------------------|----|------|--------|---|
| D_HUM<br>AN                      | OX=9606 GN=SCD<br>PE=1 SV=2                                                                                                      |    |      |        |   |
| sp P840<br>98 RL19<br>_HUMA<br>N | 60S ribosomal<br>protein L19<br>OS=Homo sapiens<br>OX=9606<br>GN=RPL19 PE=1<br>SV=1                                              | 44 | 0.14 | 23565  | 1 |
| sp Q68E<br>01 INT3_<br>HUMAN     | Integrator complex<br>subunit 3 OS=Homo<br>sapiens OX=9606<br>GN=INTS3 PE=1<br>SV=1                                              | 43 | 0.03 | 119533 | 1 |
| sp Q928<br>90 UFD1<br>_HUMA<br>N | Ubiquitin recognition<br>factor in ER-<br>associated<br>degradation protein<br>1 OS=Homo sapiens<br>OX=9606 GN=UFD1<br>PE=1 SV=3 | 42 | 0.19 | 34763  | 2 |
| sp P293<br>75 KDM                | Lysine-specific<br>demethylase 5A                                                                                                | 41 | 0.03 | 194823 | 2 |

|                                   |                                                                                                                                                  |    |      |        |   |
|-----------------------------------|--------------------------------------------------------------------------------------------------------------------------------------------------|----|------|--------|---|
| 5A_HUM<br>AN                      | OS=Homo sapiens<br><br>OX=9606<br><br>GN=KDM5A PE=1<br><br>SV=3                                                                                  |    |      |        |   |
| sp P602<br>28 EIF3<br>E_HUM<br>AN | Eukaryotic<br><br>translation initiation<br><br>factor 3 subunit E<br><br>OS=Homo sapiens<br><br>OX=9606<br><br>GN=EIF3E PE=1<br><br>SV=1        | 39 | 0.06 | 52587  | 1 |
| sp O001<br>16 ADAS<br>_HUMA<br>N  | Alkyldihydroxyaceto<br><br>nephosphate<br><br>synthase,<br><br>peroxisomal<br><br>OS=Homo sapiens<br><br>OX=9606<br><br>GN=AGPS PE=1<br><br>SV=1 | 38 | 0.09 | 73664  | 2 |
| sp A1L3<br>90 PKH                 | Pleckstrin homology<br><br>domain-containing<br><br>family G member 3                                                                            | 38 | 0.02 | 135242 | 1 |

|                       |                                                                                                |    |      |       |   |
|-----------------------|------------------------------------------------------------------------------------------------|----|------|-------|---|
| G3_HUMAN              | OS=Homo sapiens<br>OX=9606<br>GN=PLEKHG3<br>PE=1 SV=1                                          |    |      |       |   |
| sp O95140 MFN2_HUMAN  | Mitofusin-2<br>OS=Homo sapiens<br>OX=9606<br>GN=MFN2 PE=1<br>SV=3                              | 37 | 0.07 | 87088 | 2 |
| sp Q92783 STAM1_HUMAN | Signal transducing adapter molecule 1<br>OS=Homo sapiens<br>OX=9606<br>GN=STAM PE=1<br>SV=3    | 37 | 0.05 | 59541 | 1 |
| sp Q9H6H4 REEP4_HUMAN | Receptor expression-enhancing protein 4<br>OS=Homo sapiens<br>OX=9606<br>GN=REEP4 PE=1<br>SV=1 | 36 | 0.11 | 29547 | 1 |

|                                   |                                                                                                               |    |      |        |   |
|-----------------------------------|---------------------------------------------------------------------------------------------------------------|----|------|--------|---|
| sp A1L0<br>T0 ILVB<br>L_HUMA<br>N | Acetolactate<br>synthase-like protein<br>OS=Homo sapiens<br>OX=9606<br>GN=ILVBL PE=1<br>SV=2                  | 36 | 0.05 | 68452  | 1 |
| sp Q138<br>95 BYST<br>_HUMA<br>N  | Bystin OS=Homo<br>sapiens OX=9606<br>GN=BYSL PE=1<br>SV=3                                                     | 36 | 0.06 | 49798  | 1 |
| sp Q135<br>61 DCTN<br>2_HUMA<br>N | Dynactin subunit 2<br>OS=Homo sapiens<br>OX=9606<br>GN=DCTN2 PE=1<br>SV=4                                     | 36 | 0.07 | 44318  | 1 |
| sp Q6P1<br>N0 C2D1<br>A_HUM<br>AN | Coiled-coil and C2<br>domain-containing<br>protein 1A<br>OS=Homo sapiens<br>OX=9606<br>GN=CC2D1A PE=1<br>SV=1 | 35 | 0.03 | 104397 | 1 |

|                           |                                                                                                       |    |      |        |   |
|---------------------------|-------------------------------------------------------------------------------------------------------|----|------|--------|---|
| sp O15144 ARP<br>C2_HUMAN | Actin-related protein<br>2/3 complex subunit<br>2 OS=Homo sapiens<br>OX=9606<br>GN=ARPC2 PE=1<br>SV=1 | 35 | 0.09 | 34426  | 1 |
| sp P00395 COX1<br>_HUMAN  | Cytochrome c<br>oxidase subunit 1<br>OS=Homo sapiens<br>OX=9606 GN=MT-CO1<br>PE=1 SV=1                | 34 | 0.05 | 57060  | 1 |
| sp Q8IUV7 UBR1<br>1_HUMAN | E3 ubiquitin-protein<br>ligase UBR1<br>OS=Homo sapiens<br>OX=9606 GN=UBR1<br>PE=1 SV=1                | 34 | 0.02 | 203445 | 1 |
| sp P84103 SRSF3<br>_HUMAN | Serine/arginine-rich<br>splicing factor 3<br>OS=Homo sapiens<br>OX=9606<br>GN=SRSF3 PE=1<br>SV=1      | 34 | 0.36 | 19546  | 2 |



|                       |                                                                                                                   |    |      |       |   |
|-----------------------|-------------------------------------------------------------------------------------------------------------------|----|------|-------|---|
| sp O95372 LYPA2_HUMAN | <p>Acyl-protein thioesterase 2</p> <p>OS=Homo sapiens</p> <p>OX=9606</p> <p>GN=LYPLA2 PE=1</p> <p>SV=1</p>        | 34 | 0.13 | 25063 | 1 |
| sp Q86WB0 NIPAN_HUMAN | <p>Nuclear-interacting partner of ALK</p> <p>OS=Homo sapiens</p> <p>OX=9606</p> <p>GN=ZC3HC1 PE=1</p> <p>SV=1</p> | 33 | 0.06 | 56366 | 1 |
| sp Q9UKV5 AMFR_HUMAN  | <p>E3 ubiquitin-protein ligase AMFR</p> <p>OS=Homo sapiens</p> <p>OX=9606</p> <p>GN=AMFR PE=1</p> <p>SV=2</p>     | 33 | 0.09 | 73747 | 2 |
| sp Q32P41 TRM5_HUMAN  | <p>tRNA (guanine(37)-N1)-methyltransferase</p> <p>OS=Homo sapiens</p>                                             | 33 | 0.05 | 58551 | 1 |

|                       |                                                                                                  |    |      |       |   |
|-----------------------|--------------------------------------------------------------------------------------------------|----|------|-------|---|
|                       | OX=9606<br>GN=TRMT5 PE=1<br>SV=2                                                                 |    |      |       |   |
| sp P30837 AL1B1_HUMAN | Aldehyde dehydrogenase X, mitochondrial<br>OS=Homo sapiens<br>OX=9606<br>GN=ALDH1B1 PE=1<br>SV=3 | 33 | 0.05 | 57626 | 1 |
| sp Q8TC12 RDH11_HUMAN | Retinol dehydrogenase 11<br>OS=Homo sapiens<br>OX=9606<br>GN=RDH11 PE=1<br>SV=2                  | 32 | 0.09 | 35763 | 1 |
| sp Q9UNF1 MAGD2_HUMAN | Melanoma-associated antigen D2<br>OS=Homo sapiens<br>OX=9606<br>GN=MAGED2 PE=1<br>SV=2           | 32 | 0.1  | 65085 | 2 |

|                                   |                                                                                                                 |    |      |        |   |
|-----------------------------------|-----------------------------------------------------------------------------------------------------------------|----|------|--------|---|
| sp Q9U<br>M47 NO<br>TC3_HU<br>MAN | Neurogenic locus<br>notch homolog<br>protein 3 OS=Homo<br>sapiens OX=9606<br>GN=NOTCH3 PE=1<br>SV=2             | 32 | 0.01 | 256640 | 1 |
| sp O150<br>56 SYNJ<br>2_HUMA<br>N | Synaptojanin-2<br>OS=Homo sapiens<br>OX=9606<br>GN=SYNJ2 PE=1<br>SV=3                                           | 32 | 0.02 | 166575 | 1 |
| sp Q131<br>44 EI2B<br>E_HUM<br>AN | Translation initiation<br>factor eIF-2B subunit<br>epsilon OS=Homo<br>sapiens OX=9606<br>GN=EIF2B5 PE=1<br>SV=3 | 32 | 0.04 | 81071  | 1 |
| sp O007<br>50 P3C2<br>B_HUM<br>AN | Phosphatidylinositol<br>4-phosphate 3-<br>kinase C2 domain-<br>containing subunit<br>beta OS=Homo               | 32 | 0.02 | 186817 | 1 |

|                                  |                                                                                                |    |      |       |   |
|----------------------------------|------------------------------------------------------------------------------------------------|----|------|-------|---|
|                                  | sapiens OX=9606<br>GN=PIK3C2B PE=1<br>SV=2                                                     |    |      |       |   |
| sp Q136<br>10 PWP<br>1_HUMA<br>N | Periodic tryptophan<br>protein 1 homolog<br>OS=Homo sapiens<br>OX=9606<br>GN=PWP1 PE=1<br>SV=1 | 32 | 0.06 | 56363 | 1 |
| sp Q154<br>17 CNN3<br>_HUMA<br>N | Calponin-3<br>OS=Homo sapiens<br>OX=9606<br>GN=CNN3 PE=1<br>SV=1                               | 31 | 0.09 | 36562 | 1 |
| sp Q96C<br>S3 FAF2<br>_HUMA<br>N | FAS-associated<br>factor 2 OS=Homo<br>sapiens OX=9606<br>GN=FAF2 PE=1<br>SV=2                  | 31 | 0.06 | 52933 | 1 |
| sp Q7Z4<br>34 MAV                | Mitochondrial<br>antiviral-signaling<br>protein OS=Homo                                        | 30 | 0.05 | 57063 | 1 |

|                                   |                                                                                                     |    |      |        |   |
|-----------------------------------|-----------------------------------------------------------------------------------------------------|----|------|--------|---|
| S_HUM<br>AN                       | sapiens OX=9606<br>GN=MAVS PE=1<br>SV=2                                                             |    |      |        |   |
| sp Q159<br>10 EZH2<br>_HUMA<br>N  | Histone-lysine N-<br>methyltransferase<br>EZH2 OS=Homo<br>sapiens OX=9606<br>GN=EZH2 PE=1<br>SV=2   | 29 | 0.04 | 87247  | 1 |
| sp O949<br>66 UBP1<br>9_HUMA<br>N | Ubiquitin carboxyl-<br>terminal hydrolase<br>19 OS=Homo<br>sapiens OX=9606<br>GN=USP19 PE=1<br>SV=2 | 29 | 0.02 | 147441 | 1 |
| sp Q8N8<br>A6 DDX<br>51_HUM<br>AN | ATP-dependent<br>RNA helicase<br>DDX51 OS=Homo<br>sapiens OX=9606<br>GN=DDX51 PE=1<br>SV=3          | 29 | 0.04 | 72983  | 1 |

|                        |                                                                                              |    |      |        |   |
|------------------------|----------------------------------------------------------------------------------------------|----|------|--------|---|
| sp Q92973 TNPO1_HUMAN  | Transportin-1<br>OS=Homo sapiens<br>OX=9606<br>GN=TNPO1 PE=1<br>SV=2                         | 28 | 0.03 | 103771 | 1 |
| sp Q9NUU7 DD19A_HUMAN  | ATP-dependent<br>RNA helicase<br>DDX19A OS=Homo sapiens<br>OX=9606<br>GN=DDX19A PE=1<br>SV=1 | 28 | 0.06 | 54397  | 1 |
| sp Q9H1H9 K113A_HUMAN  | Kinesin-like protein<br>KIF13A OS=Homo sapiens<br>OX=9606<br>GN=KIF13A PE=1<br>SV=2          | 27 | 0.02 | 203836 | 1 |
| sp Q9HAW4 CLS1PN_HUMAN | Claspin OS=Homo sapiens<br>OX=9606<br>GN=CLSPN PE=1<br>SV=3                                  | 27 | 0.02 | 151629 | 1 |
| sp P49589 SYC          | Cysteine--tRNA<br>ligase, cytoplasmic                                                        | 27 | 0.04 | 86103  | 1 |

|                                   |                                                                                                                         |    |      |        |   |
|-----------------------------------|-------------------------------------------------------------------------------------------------------------------------|----|------|--------|---|
| C_HUM<br>AN                       | OS=Homo sapiens<br><br>OX=9606<br><br>GN=CARS PE=1<br><br>SV=3                                                          |    |      |        |   |
| sp Q5T5<br>P2 SKT_<br>HUMAN       | Sickle tail protein<br>homolog OS=Homo<br>sapiens OX=9606<br><br>GN=KIAA1217<br><br>PE=1 SV=2                           | 27 | 0.01 | 214610 | 1 |
| sp P356<br>13 BASI<br>_HUMA<br>N  | Basigin OS=Homo<br>sapiens OX=9606<br><br>GN=BSG PE=1<br><br>SV=2                                                       | 26 | 0.07 | 42573  | 1 |
| sp Q9NR<br>W7 VPS<br>45_HUM<br>AN | Vacuolar protein<br>sorting-associated<br>protein 45<br>OS=Homo sapiens<br><br>OX=9606<br><br>GN=VPS45 PE=1<br><br>SV=1 | 26 | 0.05 | 65435  | 1 |
| sp Q5TA<br>X3 TUT4                | Terminal<br>uridylyltransferase 4                                                                                       | 26 | 0.03 | 188014 | 2 |

|                        |                                                                                            |    |      |        |   |
|------------------------|--------------------------------------------------------------------------------------------|----|------|--------|---|
| _HUMAN                 | OS=Homo sapiens<br>OX=9606 GN=TUT4<br>PE=1 SV=3                                            |    |      |        |   |
| sp O15360 FANCA_HUMAN  | Fanconi anemia group A protein<br>OS=Homo sapiens<br>OX=9606<br>GN=FANCA PE=1<br>SV=2      | 26 | 0.02 | 164838 | 1 |
| sp Q9P2D3 HTR5B_HUMAN  | HEAT repeat-containing protein<br>5B OS=Homo sapiens<br>OX=9606<br>GN=HEATR5B<br>PE=1 SV=2 | 25 | 0.01 | 226839 | 1 |
| sp Q9NQW6 ANLN_HUMAN   | Anillin OS=Homo sapiens<br>OX=9606<br>GN=ANLN PE=1<br>SV=2                                 | 25 | 0.02 | 125490 | 1 |
| sp O95235 KIF20A_HUMAN | Kinesin-like protein<br>KIF20A OS=Homo sapiens<br>OX=9606                                  | 25 | 0.03 | 101242 | 1 |



|                                   |                                                                                               |    |      |        |   |
|-----------------------------------|-----------------------------------------------------------------------------------------------|----|------|--------|---|
| _HUMA<br>N                        | GN=KIF20A PE=1<br>SV=1                                                                        |    |      |        |   |
| sp Q9UI<br>12 VATH<br>_HUMA<br>N  | V-type proton<br>ATPase subunit H<br>OS=Homo sapiens<br>OX=9606<br>GN=ATP6V1H PE=1<br>SV=1    | 25 | 0.06 | 56417  | 1 |
| sp Q86U<br>K7 ZN59<br>8_HUMA<br>N | E3 ubiquitin-protein<br>ligase ZNF598<br>OS=Homo sapiens<br>OX=9606<br>GN=ZNF598 PE=1<br>SV=1 | 25 | 0.03 | 100400 | 1 |
| sp Q5JV<br>F3 PCID<br>2_HUMA<br>N | PCI domain-<br>containing protein 2<br>OS=Homo sapiens<br>OX=9606<br>GN=PCID2 PE=1<br>SV=2    | 24 | 0.07 | 46627  | 1 |
| sp Q166<br>44 MAP                 | MAP kinase-<br>activated protein                                                              | 24 | 0.07 | 43473  | 1 |

|                               |                                                                                                                 |    |      |        |   |
|-------------------------------|-----------------------------------------------------------------------------------------------------------------|----|------|--------|---|
| K3_HUM<br>AN                  | kinase 3 OS=Homo<br>sapiens OX=9606<br>GN=MAPKAPK3<br>PE=1 SV=1                                                 |    |      |        |   |
| sp P239<br>21 RIR1<br>_HUMAN  | Ribonucleoside-<br>diphosphate<br>reductase large<br>subunit OS=Homo<br>sapiens OX=9606<br>GN=RRM1 PE=1<br>SV=1 | 23 | 0.03 | 90925  | 1 |
| sp Q96S<br>N8 CK5<br>P2_HUMAN | CDK5 regulatory<br>subunit-associated<br>protein 2 OS=Homo<br>sapiens OX=9606<br>GN=CDK5RAP2<br>PE=1 SV=5       | 23 | 0.01 | 216444 | 1 |
| sp P533<br>50 PLK1<br>_HUMAN  | Serine/threonine-<br>protein kinase PLK1<br>OS=Homo sapiens<br>OX=9606 GN=PLK1<br>PE=1 SV=1                     | 23 | 0.05 | 68953  | 1 |

|                                   |                                                                                               |    |      |        |   |
|-----------------------------------|-----------------------------------------------------------------------------------------------|----|------|--------|---|
| sp Q9UB<br>D5 ORC<br>3_HUMA<br>N  | Origin recognition<br>complex subunit 3<br>OS=Homo sapiens<br>OX=9606<br>GN=ORC3 PE=1<br>SV=1 | 22 | 0.04 | 83285  | 1 |
| sp Q96N<br>66 MBO<br>A7_HUM<br>AN | Lysophospholipid<br>acyltransferase 7<br>OS=Homo sapiens<br>OX=9606<br>GN=MBOAT7 PE=1<br>SV=2 | 22 | 0.06 | 53415  | 1 |
| sp Q8N2<br>28 SCM<br>L4_HUM<br>AN | Sex comb on<br>midleg-like protein 4<br>OS=Homo sapiens<br>OX=9606<br>GN=SCML4 PE=1<br>SV=2   | 22 | 0.07 | 45507  | 1 |
| sp Q9UP<br>V0 CE16<br>4_HUMA<br>N | Centrosomal protein<br>of 164 kDa<br>OS=Homo sapiens<br>OX=9606                               | 20 | 0.02 | 164727 | 1 |

|                        |                                                                                                   |    |      |       |   |
|------------------------|---------------------------------------------------------------------------------------------------|----|------|-------|---|
|                        | GN=CEP164 PE=1<br>SV=3                                                                            |    |      |       |   |
| sp O43505 B4GA1_HUMAN  | Beta-1,4-glucuronyltransferase 1 OS=Homo sapiens OX=9606<br>GN=B4GAT1 PE=1<br>SV=1                | 20 | 0.07 | 47545 | 1 |
| sp Q8NB M4 UBAC2_HUMAN | Ubiquitin-associated domain-containing protein 2 OS=Homo sapiens OX=9606<br>GN=UBAC2 PE=1<br>SV=1 | 19 | 0.08 | 39337 | 1 |
| sp Q86W42 THOC6_HUMAN  | THO complex subunit 6 homolog OS=Homo sapiens OX=9606<br>GN=THOC6 PE=1<br>SV=1                    | 19 | 0.08 | 38081 | 1 |
| sp O95251 KAT7         | Histone acetyltransferase                                                                         | 19 | 0.04 | 71282 | 1 |

|                       |                                                                                                    |    |      |        |   |
|-----------------------|----------------------------------------------------------------------------------------------------|----|------|--------|---|
| _HUMAN                | KAT7 OS=Homo sapiens OX=9606<br>GN=KAT7 PE=1<br>SV=1                                               |    |      |        |   |
| sp Q9Y3A4 RRP7A_HUMAN | Ribosomal RNA-processing protein 7 homolog A<br>OS=Homo sapiens OX=9606<br>GN=RRP7A PE=1<br>SV=2   | 18 | 0.1  | 32485  | 1 |
| sp Q8IWR0 Z3H7A_HUMAN | Zinc finger CCCH domain-containing protein 7A<br>OS=Homo sapiens OX=9606<br>GN=ZC3H7A PE=1<br>SV=1 | 17 | 0.03 | 112348 | 1 |
| sp P63241 IF5A1_HUMAN | Eukaryotic translation initiation factor 5A-1<br>OS=Homo sapiens                                   | 16 | 0.19 | 17049  | 1 |

|                                   |                                                                                                       |    |      |       |   |
|-----------------------------------|-------------------------------------------------------------------------------------------------------|----|------|-------|---|
|                                   | OX=9606<br>GN=EIF5A PE=1<br>SV=2                                                                      |    |      |       |   |
| sp Q9UG<br>P4 LIMD<br>1_HUMA<br>N | LIM domain-<br>containing protein 1<br>OS=Homo sapiens<br>OX=9606<br>GN=LIMD1 PE=1<br>SV=1            | 16 | 0.04 | 73855 | 1 |
| sp P316<br>89 DNJA<br>1_HUMA<br>N | DnaJ homolog<br>subfamily A member<br>1 OS=Homo sapiens<br>OX=9606<br>GN=DNAJA1 PE=1<br>SV=2          | 16 | 0.07 | 45581 | 1 |
| sp P561<br>82 RRP1<br>_HUMA<br>N  | Ribosomal RNA<br>processing protein 1<br>homolog A<br>OS=Homo sapiens<br>OX=9606 GN=RRP1<br>PE=1 SV=1 | 16 | 0.06 | 53035 | 1 |

|                                   |                                                                                                                         |    |      |       |   |
|-----------------------------------|-------------------------------------------------------------------------------------------------------------------------|----|------|-------|---|
| sp Q9H1<br>I8 ASCC<br>2_HUMA<br>N | Activating signal<br>cointegrator 1<br>complex subunit 2<br>OS=Homo sapiens<br>OX=9606<br>GN=ASCC2 PE=1<br>SV=3         | 15 | 0.04 | 87048 | 1 |
| sp O151<br>73 PGR<br>C2_HUM<br>AN | Membrane-<br>associated<br>progesterone<br>receptor component<br>2 OS=Homo sapiens<br>OX=9606<br>GN=PGRMC2 PE=1<br>SV=1 | 15 | 0.13 | 23861 | 1 |
| sp Q8NH<br>H9 ATLA<br>2_HUMA<br>N | Atlastin-2 OS=Homo<br>sapiens OX=9606<br>GN=ATL2 PE=1<br>SV=2                                                           | 15 | 0.05 | 66814 | 1 |
| sp Q96F<br>86 EDC3                | Enhancer of mRNA-<br>decapping protein 3<br>OS=Homo sapiens                                                             | 14 | 0.06 | 56784 | 1 |

|                                   |                                                                                                                |    |      |        |   |
|-----------------------------------|----------------------------------------------------------------------------------------------------------------|----|------|--------|---|
| _HUMA<br>N                        | OX=9606 GN=EDC3<br>PE=1 SV=1                                                                                   |    |      |        |   |
| sp P041<br>96 HRG<br>_HUMA<br>N   | Histidine-rich<br>glycoprotein<br>OS=Homo sapiens<br>OX=9606 GN=HRG<br>PE=1 SV=1                               | 14 | 0.05 | 60510  | 1 |
| sp Q8W<br>ZA2 RP<br>GF4_HU<br>MAN | Rap guanine<br>nucleotide exchange<br>factor 4 OS=Homo<br>sapiens OX=9606<br>GN=RAPGEF4<br>PE=1 SV=1           | 14 | 0.03 | 116474 | 1 |
| sp O953<br>82 M3K6<br>_HUMA<br>N  | Mitogen-activated<br>protein kinase<br>kinase kinase 6<br>OS=Homo sapiens<br>OX=9606<br>GN=MAP3K6 PE=1<br>SV=3 | 13 | 0.02 | 144217 | 1 |
| sp Q96M<br>95 CCD4                | Coiled-coil domain-<br>containing protein 42                                                                   | 13 | 0.08 | 38052  | 1 |



|        |                 |  |  |  |  |
|--------|-----------------|--|--|--|--|
| 2_HUMA | OS=Homo sapiens |  |  |  |  |
| N      | OX=9606         |  |  |  |  |
|        | GN=CCDC42 PE=1  |  |  |  |  |
|        | SV=2            |  |  |  |  |

Supplementary Table 2. The prime used to construct the plasmids

| Plasmid   | Forward Prime                                                       | Reverse Prime                                                      |
|-----------|---------------------------------------------------------------------|--------------------------------------------------------------------|
| shDJ-1#1  | CCGGACTCTGAGAATCGTGTGGA<br>AACTCGAGTTTCCACACGATTCTC<br>AGAGTTTTTTTG | AATTCAAAAACTCTGAGAATCG<br>TGTGGAAACTCGAGTTTCCACAC<br>GATTCTCAGAGT  |
| shDJ-1#2  | CCGGTTCTACCAGGAGGTAATCT<br>GGCTCGAGCCAGATTACCTCCTG<br>GTAGAATTTTTG  | AATTCAAAATTCTACCAGGAGG<br>TAATCTGGCTCGAGCCAGATTAC<br>CTCCTGGTAGAA  |
| shNRF2    | CCGGCCGGCATTTCACTAAACAC<br>AACTCGAGTTGTGTTTAGTGAAAT<br>GCCGGTTTTTG  | AATTCAAAACCGGCATTTCACT<br>AAACACA ACTCGAGTTGTGTTTA<br>GTGAAATGCCGG |
| shSAH H#1 | CCGGATGCCATTGTGTGTAACAT<br>TGCTCGAGCAATGTTACACACAA<br>TGGCATTTTTTTG | AATTCAAAAATGCCATTGTGTG<br>TAACATTGCTCGAGCAATGTTAC<br>ACACAATGGCATT |

|                        |                                                                    |                                                                    |
|------------------------|--------------------------------------------------------------------|--------------------------------------------------------------------|
| shSAH<br>H#2           | CCGGGTCAGGAGGGCAACATCTT<br>TGCTCGAGCAAAGATGTTGCCCT<br>CCTGACTTTTTG | AATTCAAAAAGTCAGGAGGGCA<br>ACATCTTTGCTCGAGCAAAGATG<br>TTGCCCTCCTGAC |
| shAHC<br>YL1#1         | CCGGGCACTGATAGAACTCTATA<br>ATCTCGAGATTATAGAGTTCTATC<br>AGTGCTTTTTG | AATTCAAAAAGCACTGATAGAAC<br>TCTATAATCTCGAGATTATAGAG<br>TTCTATCAGTGC |
| shAHC<br>YL1#2         | CCGGCAGCAGCAATTTCTGTGTG<br>AACTCGAGTTCACACAGAAATTG<br>CTGCTGTTTTG  | AATTCAAAAACAGCAGCAATTC<br>TGTGTGAACTCGAGTTCACACAG<br>AAATTGCTGCTG  |
| shAHC<br>YL2#1         | CCGGGCTCTAGCAGAAAGTGGAT<br>TTCTCGAGAAATCCACTTTCTGCT<br>AGAGCTTTTTG | AATTCAAAAAGCTCTAGCAGAAA<br>GTGGATTTCTCGAGAAATCCACT<br>TTCTGCTAGAGC |
| shAHC<br>YL2#2         | CCGGGCAGAGTTTGGACGAAGA<br>GAACTCGAGTTCTCTTCGTCCAA<br>ACTCTGCTTTTTG | AATTCAAAAAGCAGAGTTTGGAC<br>GAAGAGAACTCGAGTTCTCTTCG<br>TCCAAACTCTGC |
| pCDH-<br>SAHH-<br>HA   | CGGAATTCACCATGTCTGACAAA<br>CTGCCCTA                                | CGGCGGCCGCTCAGGCGTAGTC<br>GGGGACGTCGTAGGGGTAGTAG<br>CGGTAGTGATCCG  |
| pCDH-<br>DJ-1-<br>flag | CGGAATTCACCATGGATTACAAG<br>GATGACGACGATAAGATGGCTTC<br>CAAAGAGCTC   | CGGGATCCCTAGTCTTTAAGAAC<br>AAGTG                                   |

|                        |                                               |                                               |
|------------------------|-----------------------------------------------|-----------------------------------------------|
| pCDH-<br>DJ1<br>M26I   | GGTCATCCCTGTAGATGTCATCA<br>GGCGAGCTGGGATTAAGG | CCTTAATCCCAGCTCGCCTGATG<br>ACATCTACAGGGATGACC |
| pCDH-<br>DJ1-<br>E64D  | CCTTGAAGATGCAAAAAAAGACG<br>GACCATATGATGTGGTGG | CCACCACATCATATGGTCCGTCT<br>TTTTTTGCATCTTCAAGG |
| pCDH-<br>DJ1-<br>R98Q  | ACTGAAGGAGCAGGAAAACCAGA<br>AGGGCCTGATAGCCGCCA | TGGCGGCTATCAGGCCCTTCTG<br>GTTTTCTGCTCCTTCAGT  |
| pCDH-<br>DJ1-<br>A104T | CCGGAAGGGCCTGATAGCCACC<br>ATCTGTGCAGGTCCTACTG | CAGTAGGACCTGCACAGATGGT<br>GGCTATCAGGCCCTTCCGG |
| pCDH-<br>DJ1-<br>D149A | TGAGAATCGTGTGGAAAAGCCG<br>GCCTGATTCTTACAAGCC  | GGCTTGTAAGAATCAGGCCGGC<br>TTTTTCCACACGATTCTCA |
| pCDH-<br>DJ1-<br>G150S | GAATCGTGTGGAAAAGACTCCC<br>TGATTCTTACAAGCCGGG  | CCCGGCTTGTAAGAATCAGGGA<br>GTCTTTTTCCACACGATTC |
| pCDH-<br>DJ1-<br>E163K | GGGGCCTGGGACCAGCTTCAAG<br>TTTGCCTTGCAATTGTTG  | CAACAATTGCAAGCGCAAATTG<br>AAGCTGGTCCCAGGCCCC  |

|                          |                                                |                                                |
|--------------------------|------------------------------------------------|------------------------------------------------|
| pCDH-<br>DJ1-<br>L166P   | GACCAGCTTCGAGTTTGC GCCTG<br>CAATTGTTGAAGCCCTGA | TCAGGGCTTCAACAATTGCAGG<br>CGCAA ACTCGAAGCTGGTC |
| pCDH-<br>DJ1-<br>A171S   | TGCGCTTGCAATTGTTGAATCCCT<br>GAATGGCAAGGAGGTGG  | CCACCTCCTTGCCATTCAGGGAT<br>TCAACAATTGCAAGCGCA  |
| pCDH-<br>AHCYL<br>1-Flag | CGGGATCCACCATGTCGATGCCT<br>GACGCGAT            | CGGCGGCCGCTTAGTATCTGTA<br>ATAATTAG             |
| pCDH-<br>AHCYL<br>2-Flag | CGGCTAGCACCATGTCGGTGCAG<br>GTTGTGTC            | CGGGATCCTCAATACCTGTAGTA<br>ATTAG               |

Supplementary Table 3. The sequences of the primers for the quantitative RT-PCR

| Gene           | Forward Prime          | Reverse Prime               |
|----------------|------------------------|-----------------------------|
| $\beta$ -ACTIN | CACCATTGGCAATGAGCGGTTC | AGGTCTTTGCGGATGTCCACG<br>T  |
| PARK7          | GTAGCCGTGATGTGGTCATTT  | CTGTGCGCCCAGATTACCT         |
| PTGS2          | CTGGCGCTCAGCCATACAG    | CGCACTTATACTGGTCAAATC<br>CC |

|        |                              |                            |
|--------|------------------------------|----------------------------|
| NRF2   | CACATCCAGTCAGAAACCAGTG<br>G  | GGAATGTCTGCGCCAAAAGCT<br>G |
| HMOX1  | CCAGGCAGAGAATGCTGAGTTC       | AAGACTGGGCTCTCCTTGTTG<br>C |
| NQO1   | GAAGAGCACTGATCGTACTGGC       | GGATACTGAAAGTTCGCAGGG      |
| FTH1   | TCCTACGTTTACCTGTCCATGT       | GTTTGTGCAGTTCCAGTAGTG<br>A |
| FTL    | TACGAGCGTCTCCTGAAGATGC       | GGTTCAGCTTTTTCTCCAGGG<br>C |
| GCLM   | TGAACTGGGGCCGCCTGCGG         | CAATGAACAGTTTTGCAGAA       |
| CBS    | GATTATCGAGCCGACATCCG         | GTCCTCACAATCTCAGCCC        |
| BHMT   | GACCTTCACCTTCTATGCGAG        | AGCTTCATTGACTTCCTGCC       |
| MAT1A  | CCCTGAAGGAGCAAGTCATC         | AATCTTACGGCCAGTGACAC       |
| MAT2A  | ATGAACGGACAGCTCAACGG         | CCAGCAAGAAGGATCATTCCA<br>G |
| AHCY   | GCACTTTGAGCAGATGAAGG         | GCCCATTCTTCAACCGATACC      |
| MS     | ATCTCATCTGGAATAAAGACCC<br>TG | TTCACAAGGGCATACTCAAGG      |
| CTH    | GGCCTGGTGTCTGTTAATTGT        | GCCATTCCGTTTTTGAATGCT      |
| AHCYL2 | TTCAACAAACGTCCCACCAA         | CCTGGGCGATGTCTCATCA        |
