# Supplementary material for: DJ-1 suppresses ferroptosis through preserving the activity of S-adenosyl homocysteine hydrolase
Source: PubMed Central journal article supplement (PMC7060199; doi:10.1038/s41467-020-15109-y), 2020-03-06
Supplement: 41467_2020_15109_MOESM4_ESM.pdf [file 41467_2020_15109_MOESM4_ESM.pdf]

**DJ-1 Suppresses Ferroptosis Through Preserving The Activity of S-adenosyl  
Homocysteine Hydrolase**

Cao et al.

## Raw data of western blot

Figure 1a

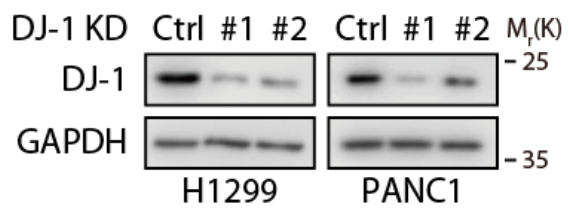

Raw data of western blot:

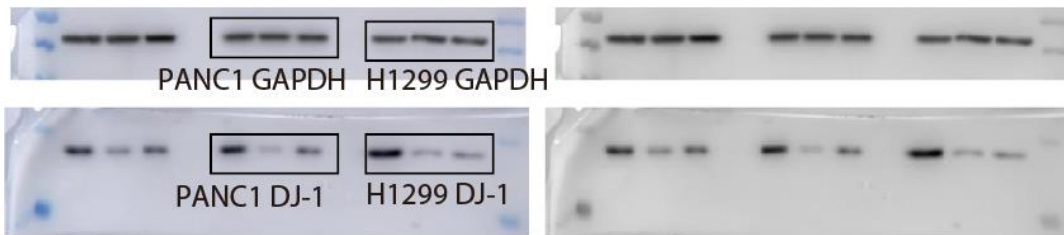

**Figure 2a**

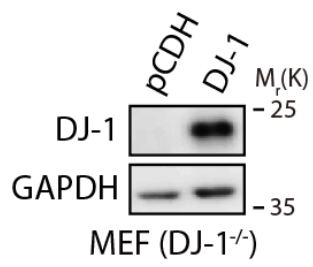

Raw data of western blot:

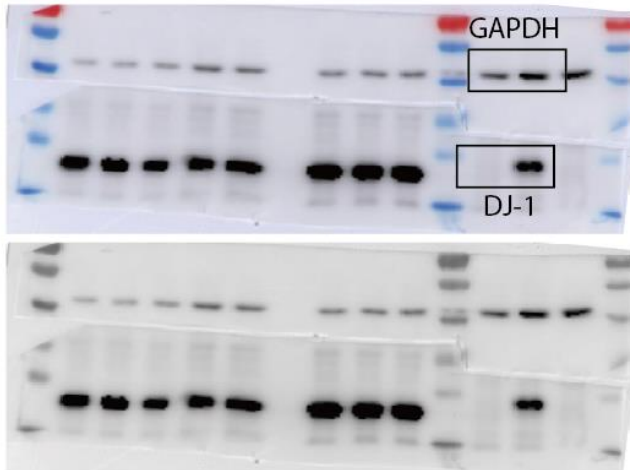

**Figure 2e**

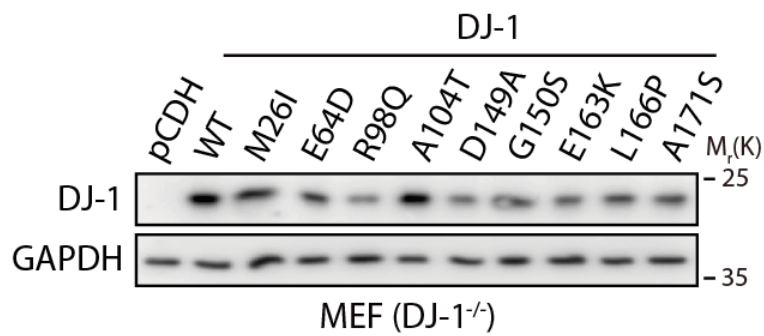

Raw data of western blot:

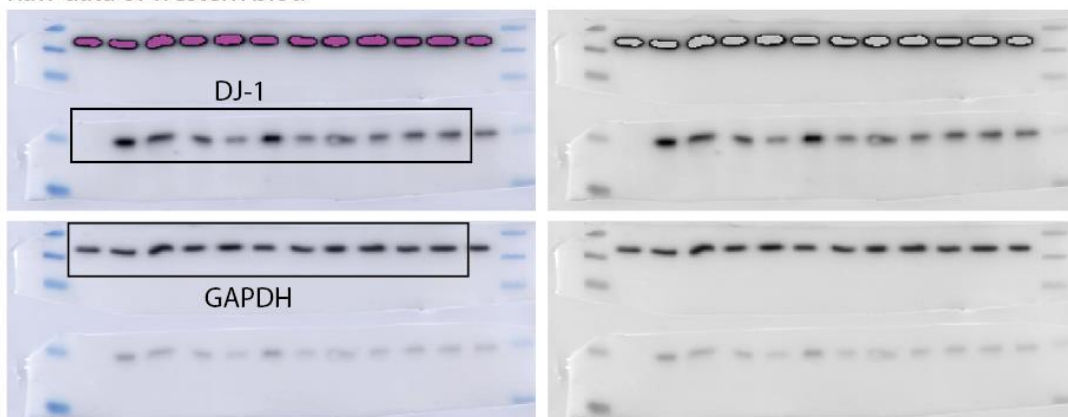

**Figure 3a**

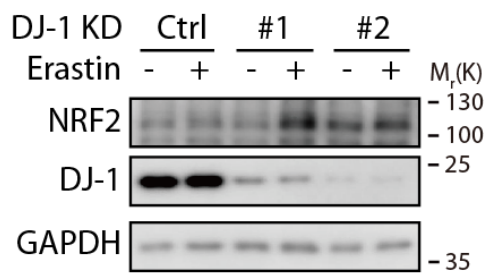

Raw data of western blot:

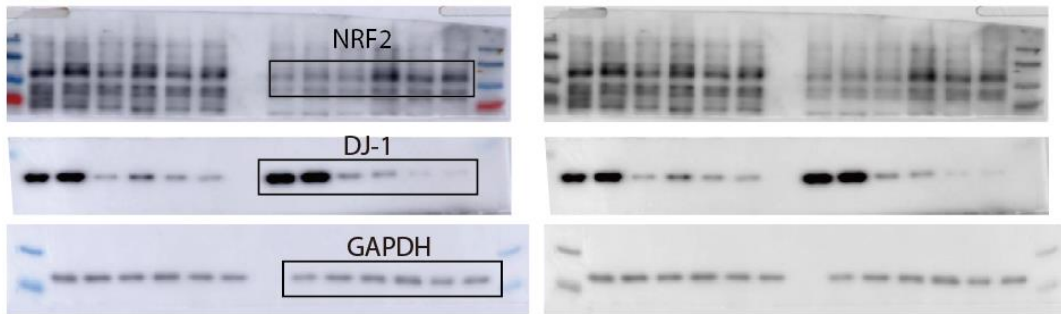

**Figure 5g**

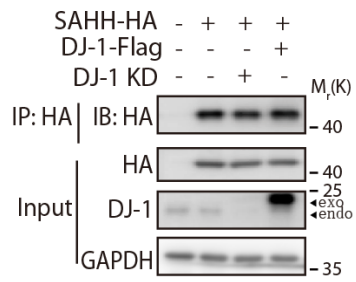

Raw data of western blot:

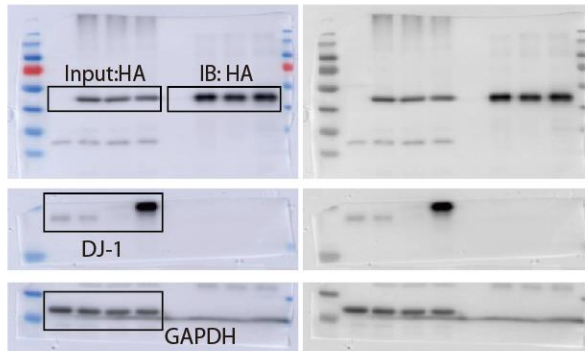

**Figure 5i**

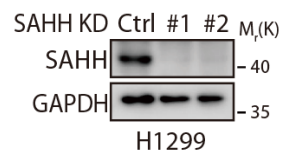

Raw data of western blot:

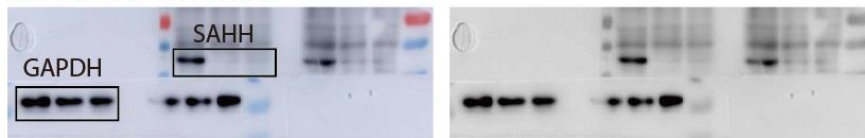

**Figure 5k**

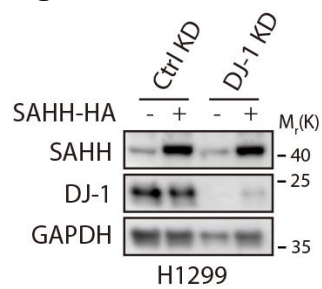

Raw data of western blot:

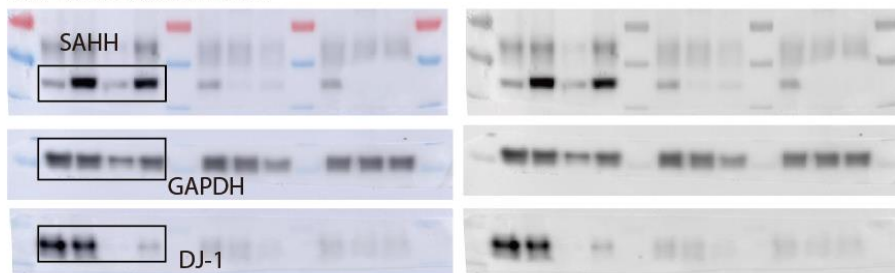

**Figure 6c (left view)**

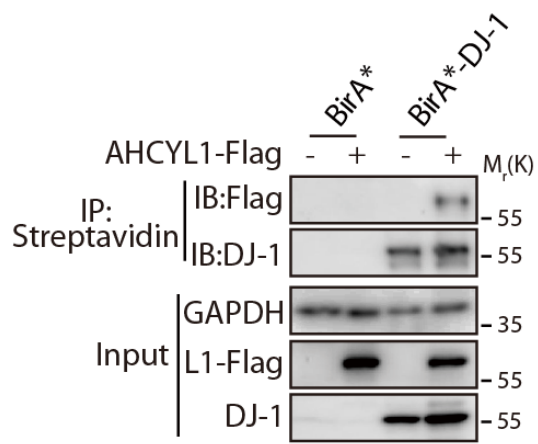

Raw data of western blot:

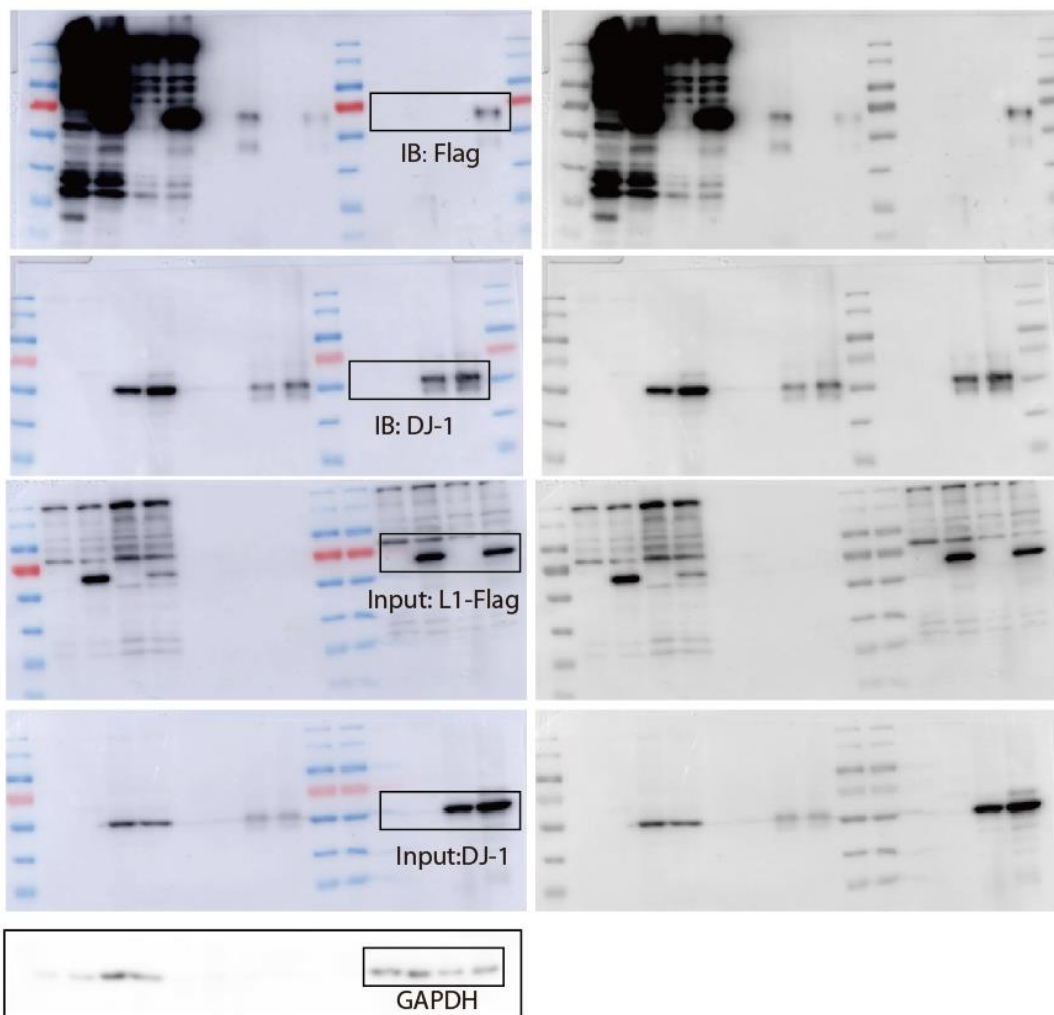

**Figure 6c (right view)**

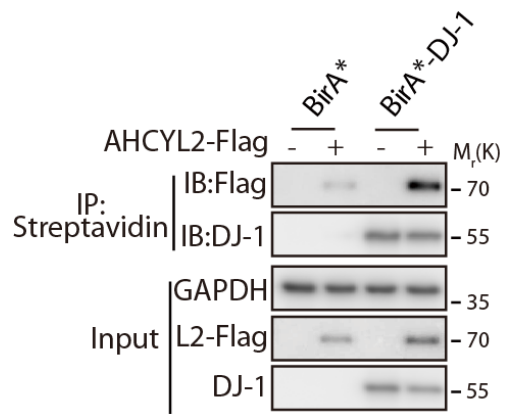

Raw data of western blot:

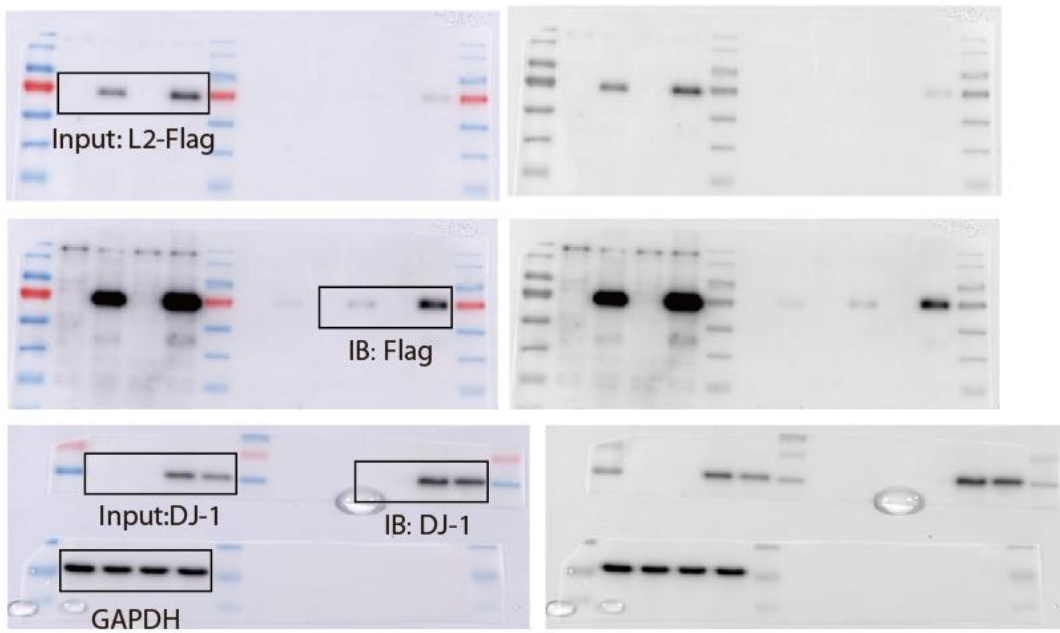

**Figure 6d**

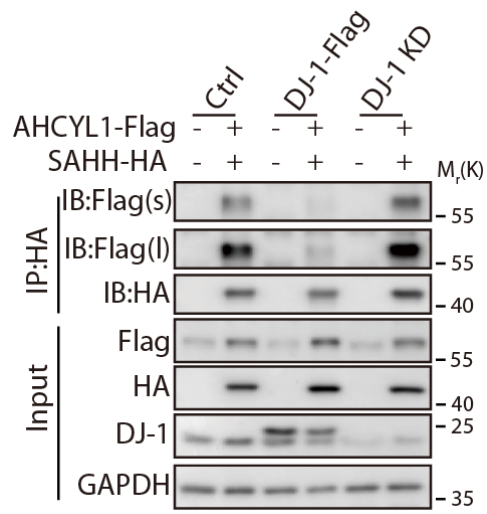

Raw data of western blot:

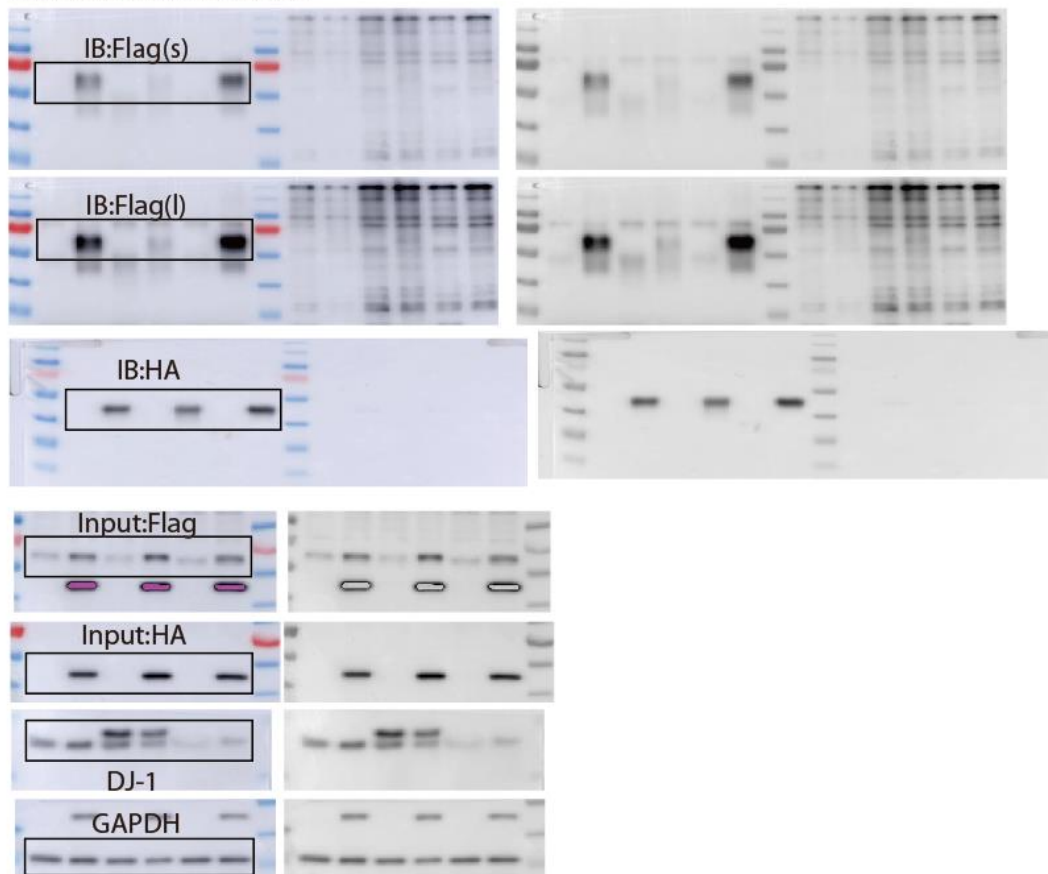



**Figure 6e**

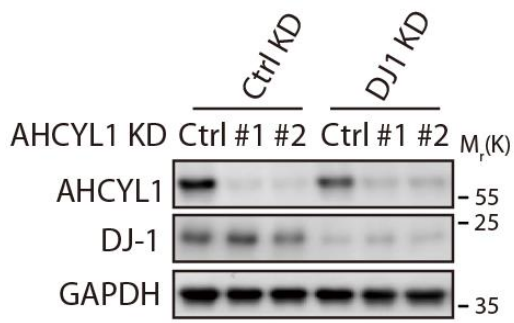

Raw data of western blot:

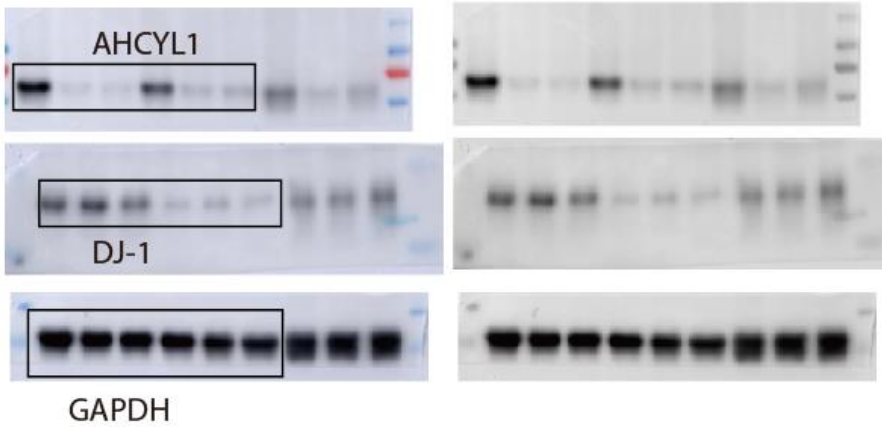

**Figure 6g**

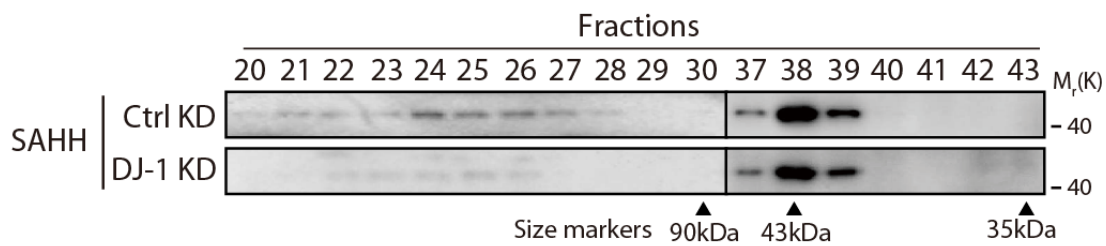

Raw data of western blot:

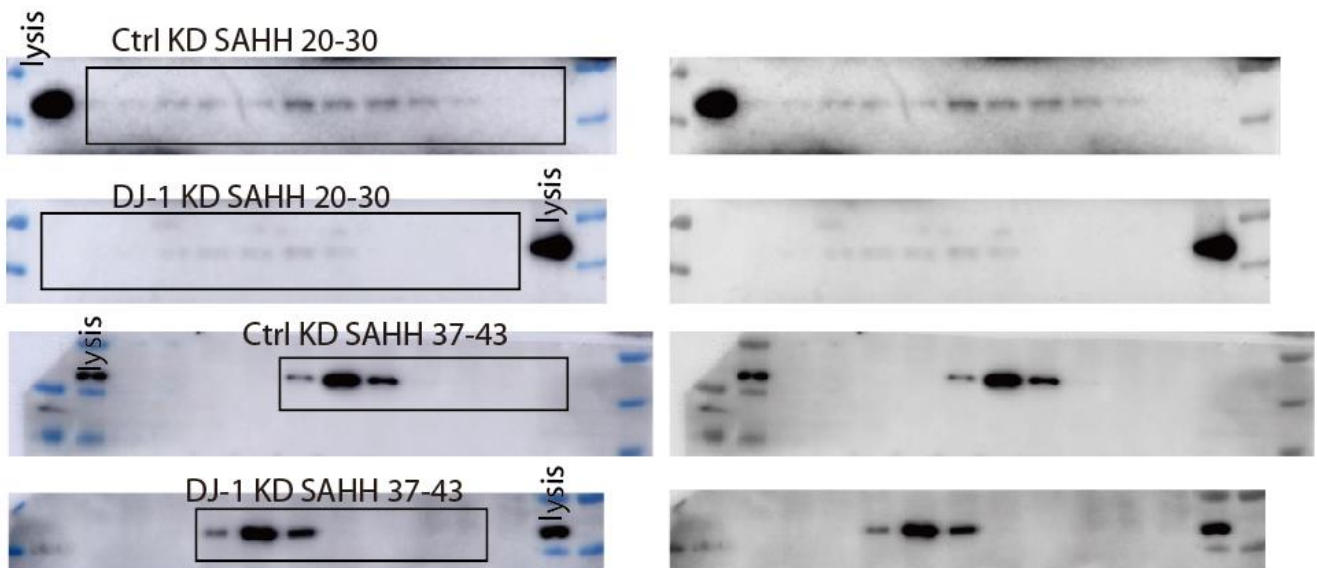

### Supplementary Figure 1a

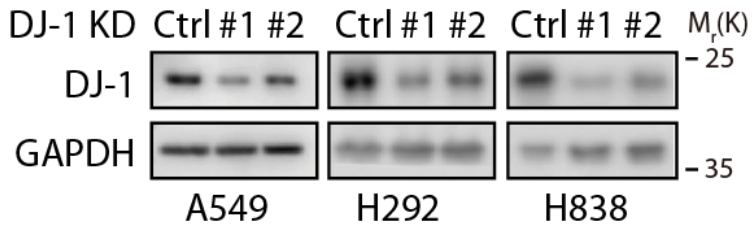

Raw data of western blot:

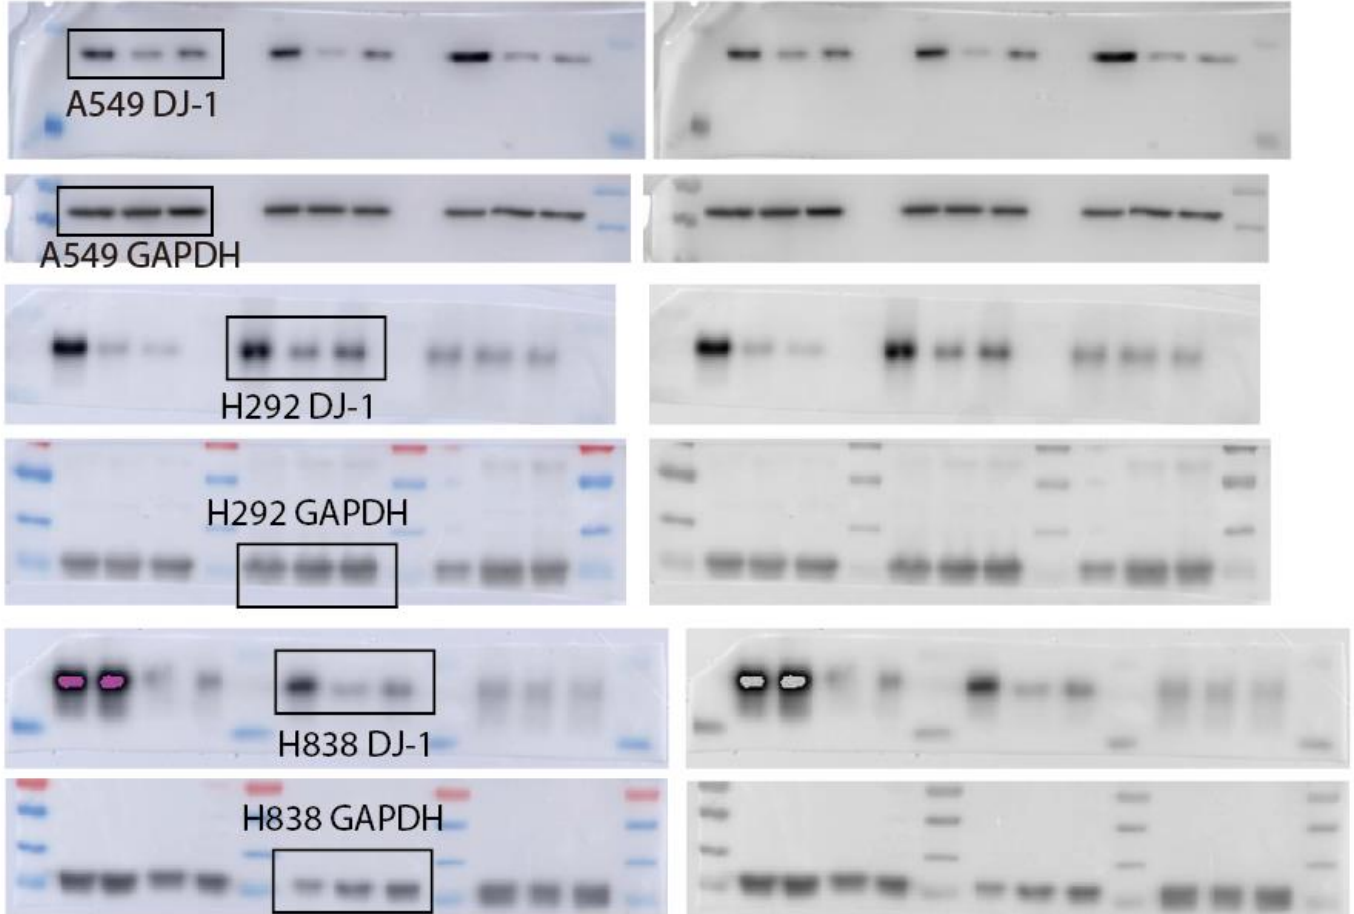

### Supplementary Figure 1d

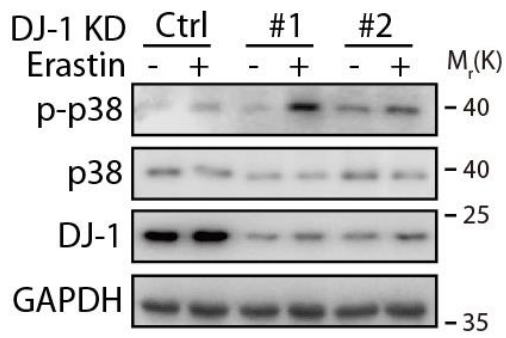

Raw data of western blot:

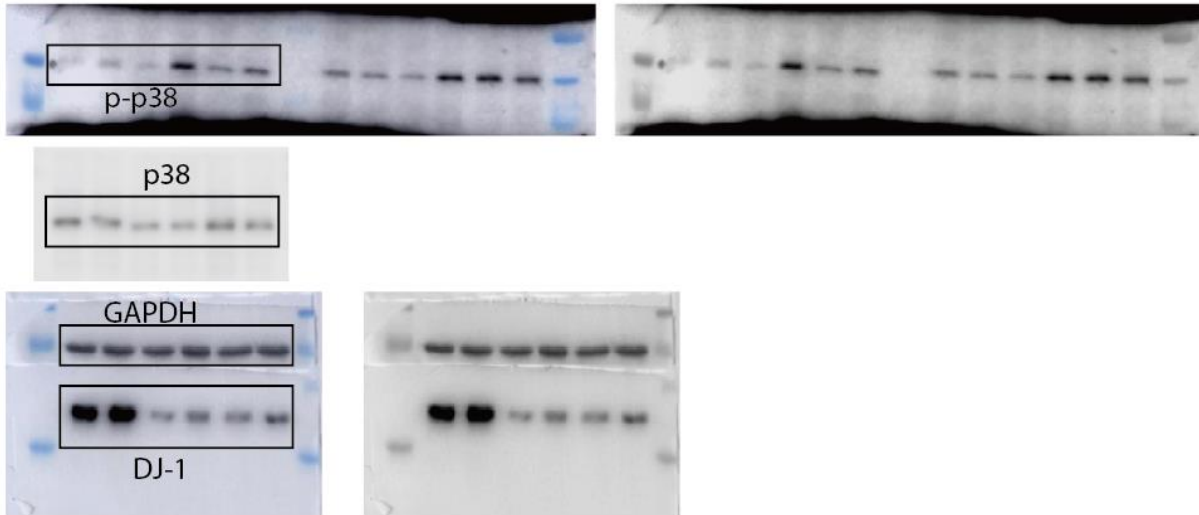

### Supplementary Figure 1g

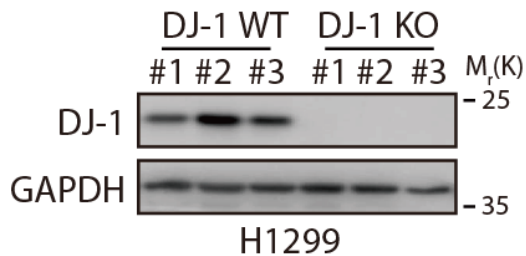

Raw data of western blot:

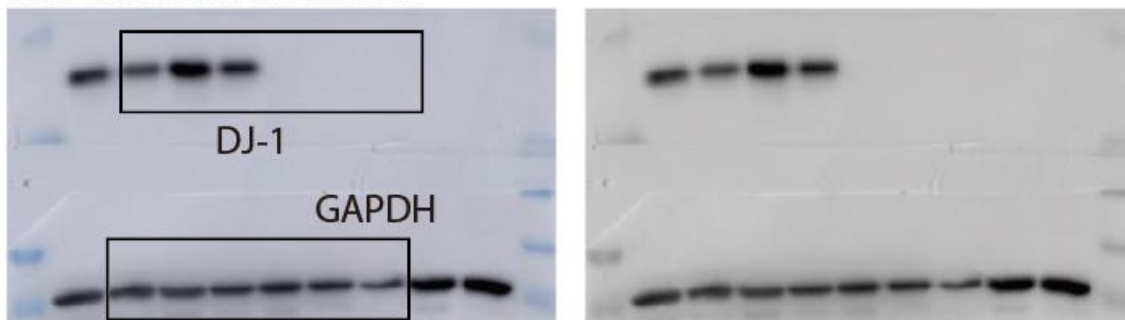

## Supplementary Figure 2a

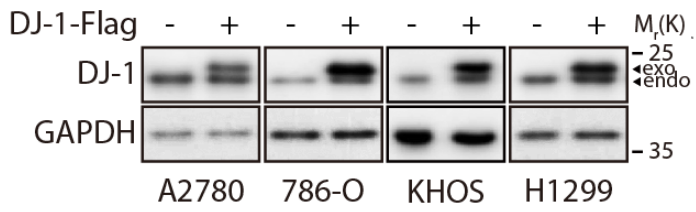

Raw data of western blot:

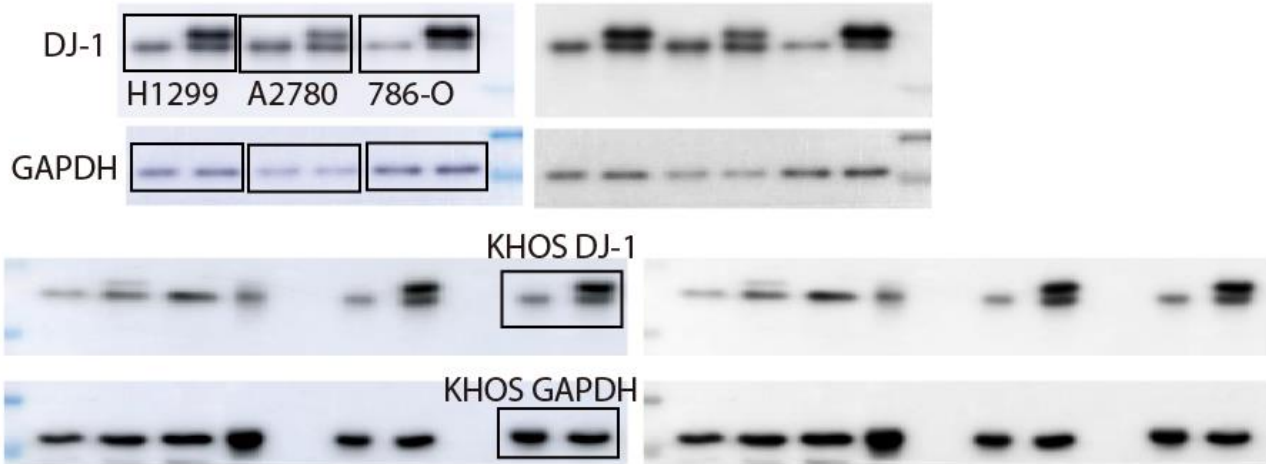

### Supplementary Figure 3a

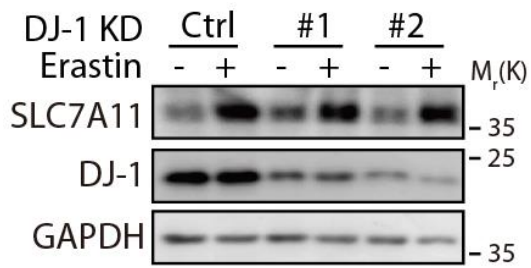

Raw data of western blot:

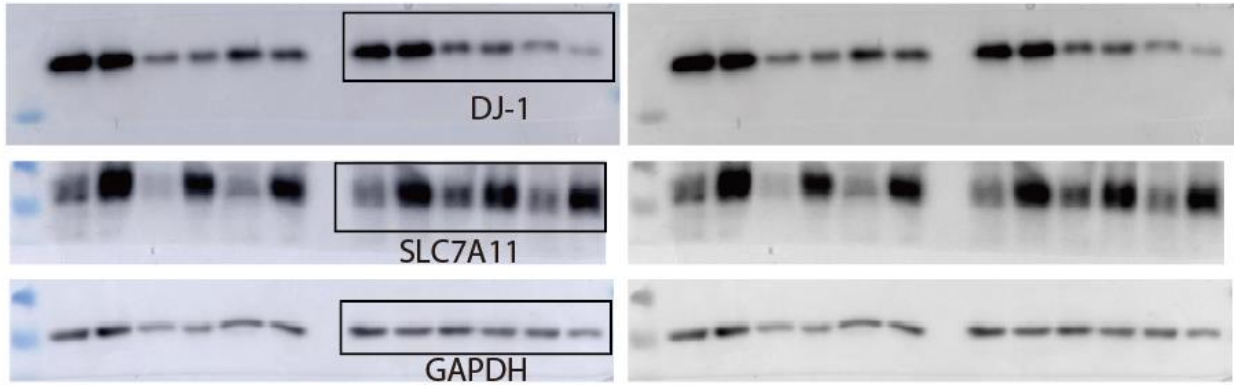

### Supplementary Figure 3f

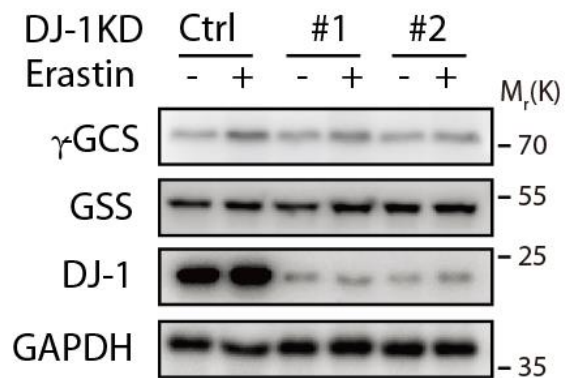

Raw data of western blot:

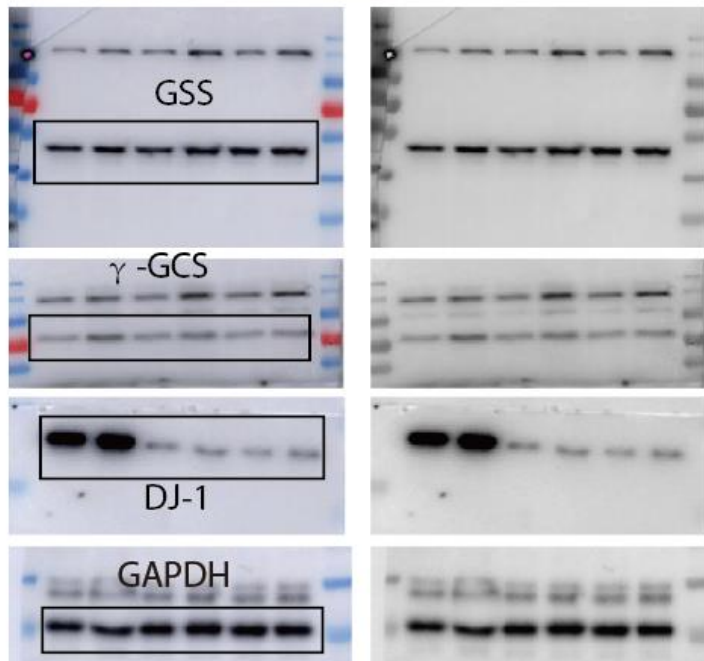

## Supplementary Figure 4h

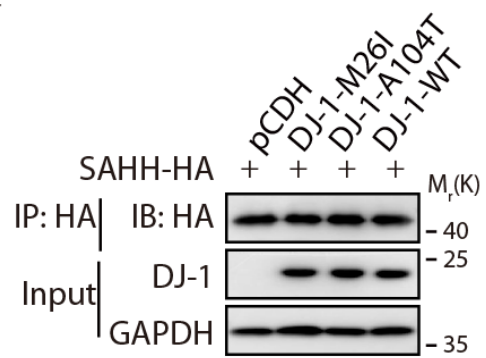

Raw data of western blot:

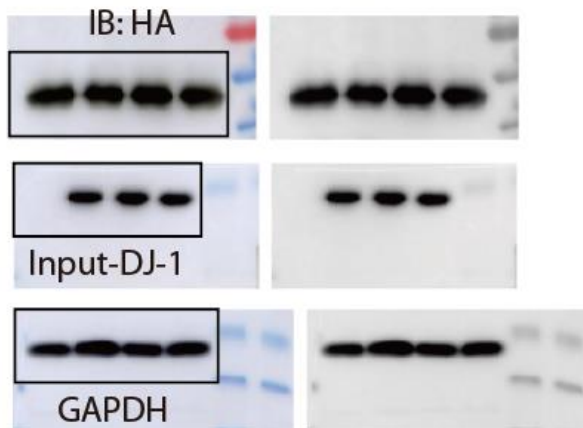

### Supplementary Figure 5a

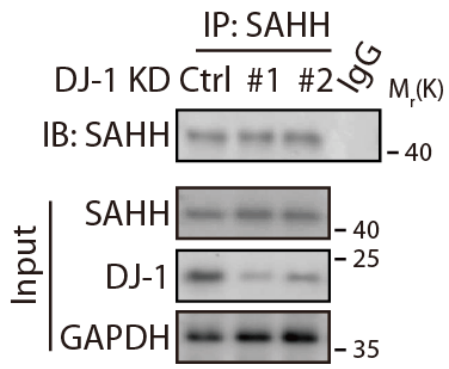

Raw data of western blot:

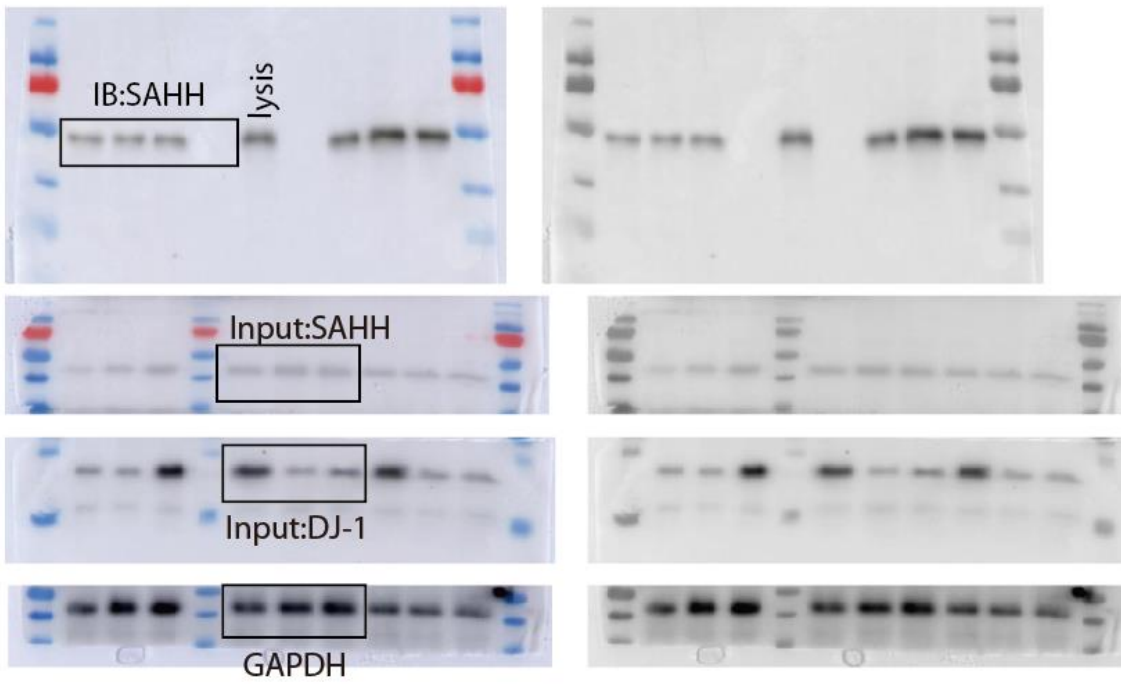

### Supplementary Figure 5f

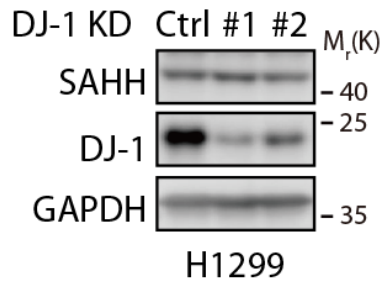

Raw data of western blot:

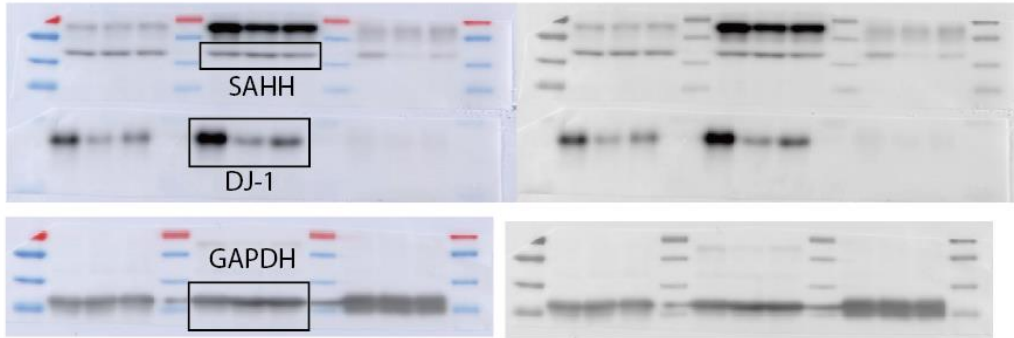

### Supplementary Figure 5g

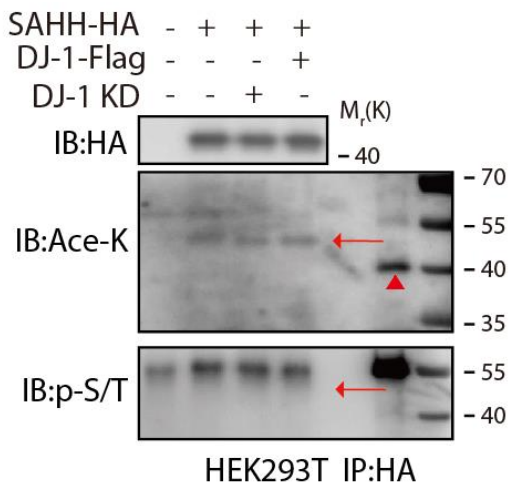

Raw data of western blot:

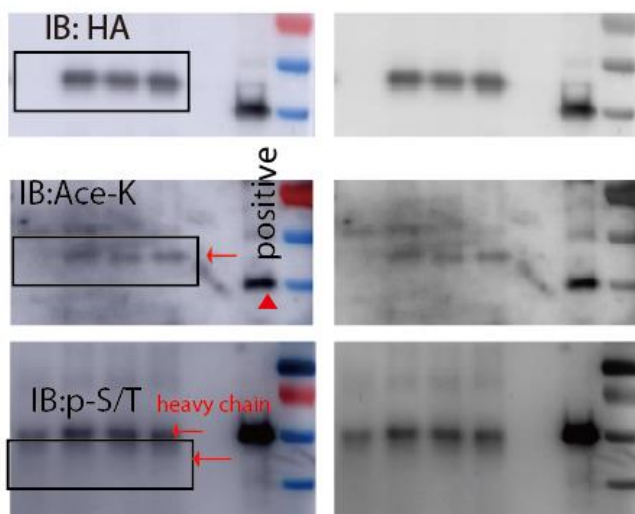



### Supplementary Figure 5h

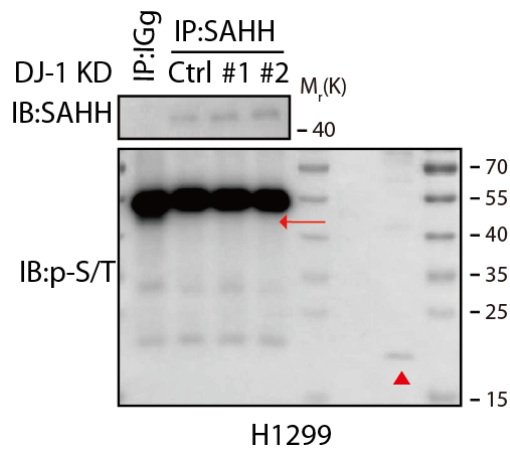

Raw data of western blot:

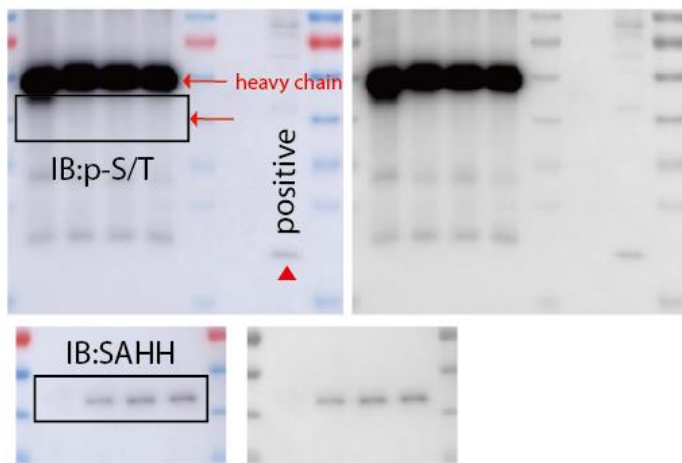

### Supplementary Figure 5i

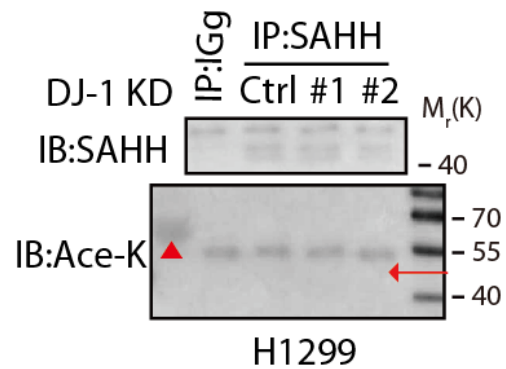

Raw data of western blot:

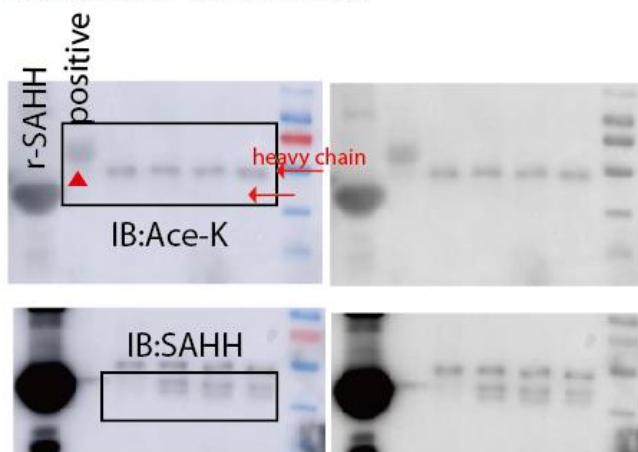

## Supplementary Figure 6b

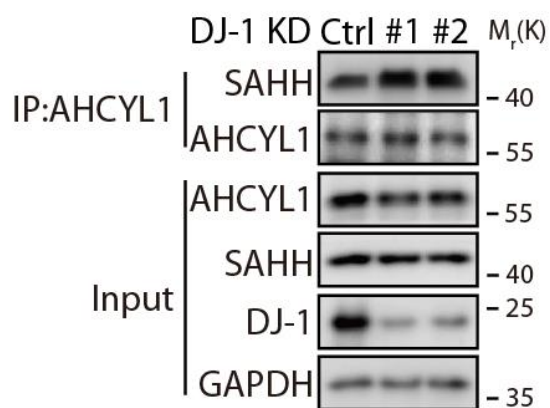

Raw data of western blot:

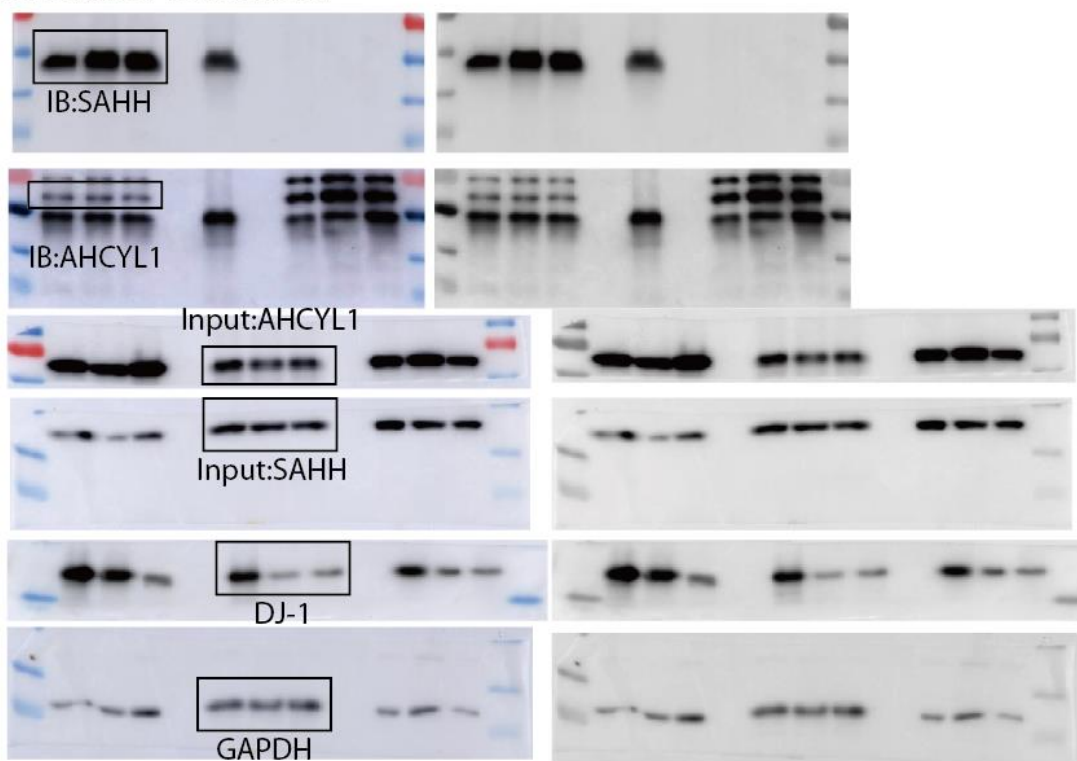

**Supplementary Figure 6c**

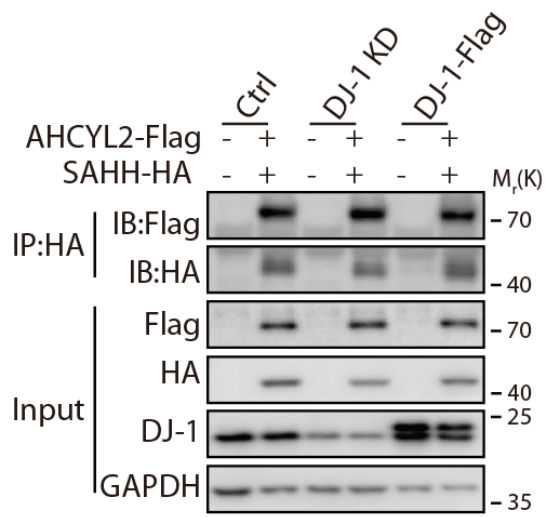

Raw data of western blot:

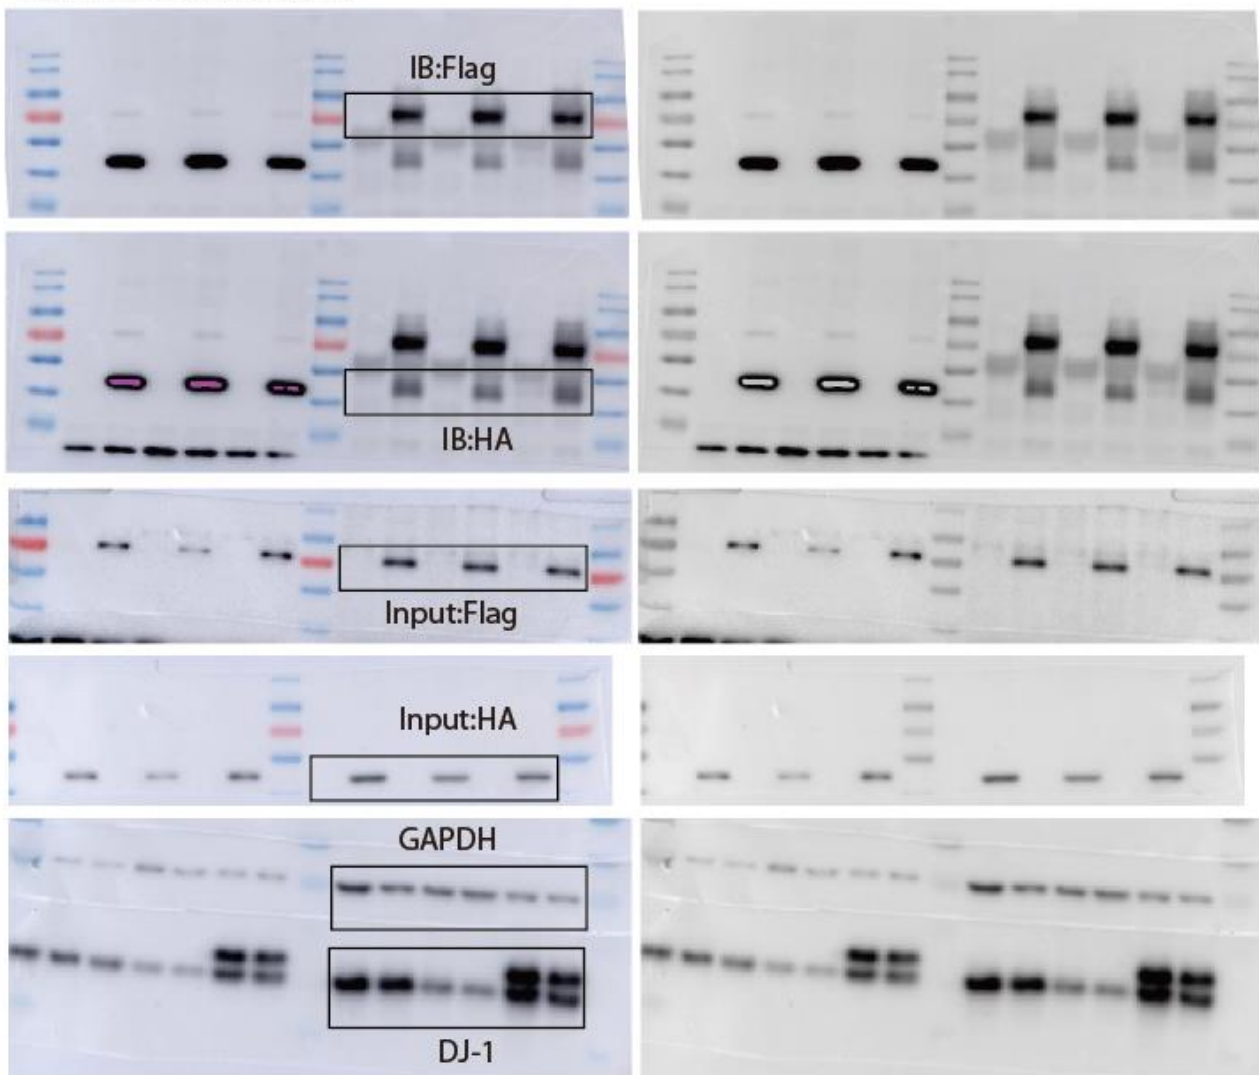

Supplementary Figure 6h

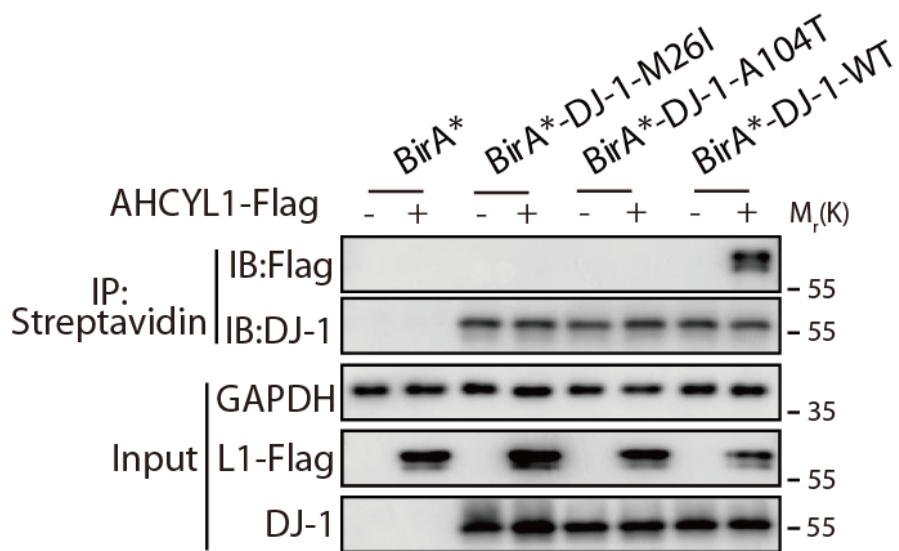

Raw data of western blot:

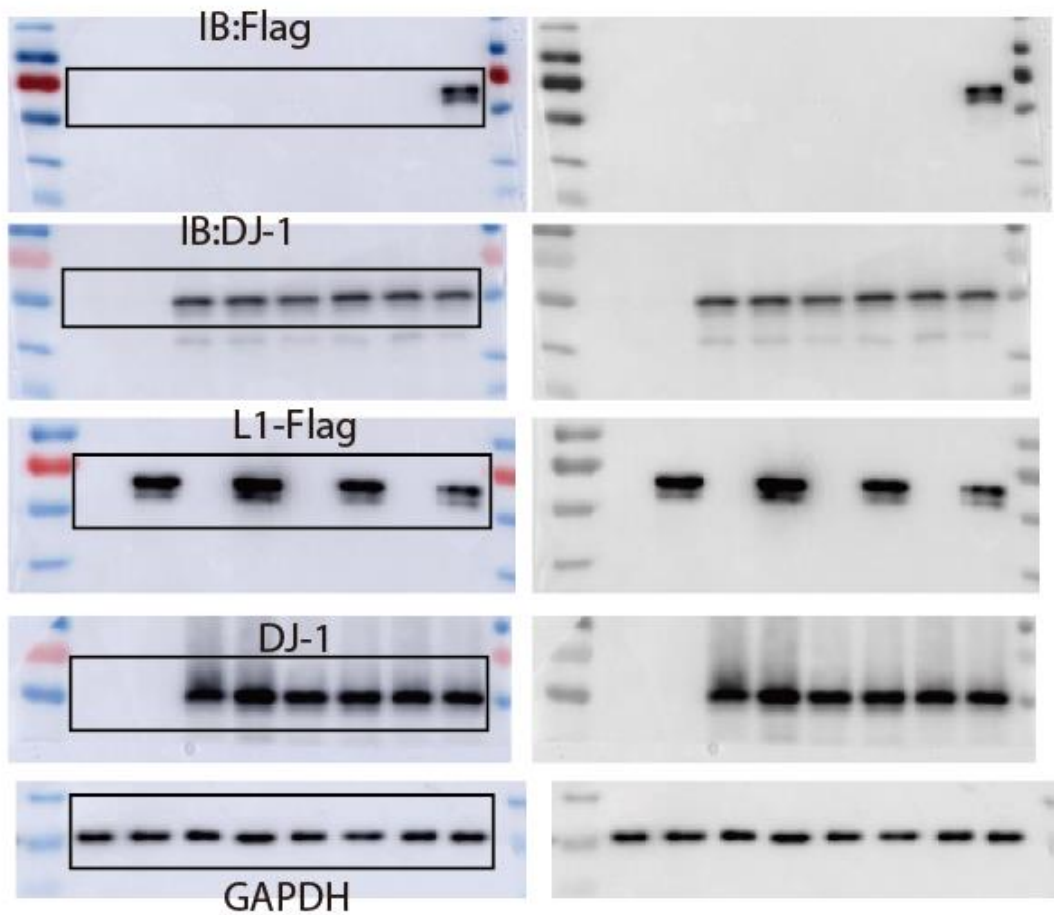

### Supplementary Figure 6i

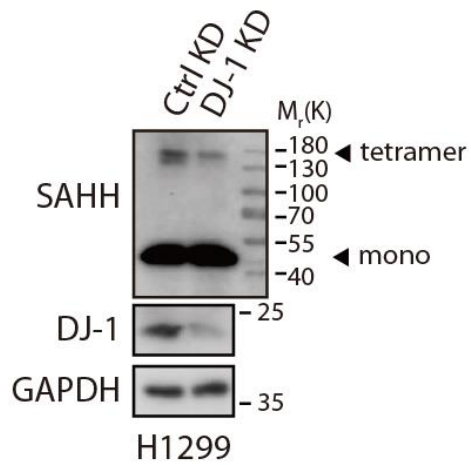

Raw data of western blot:

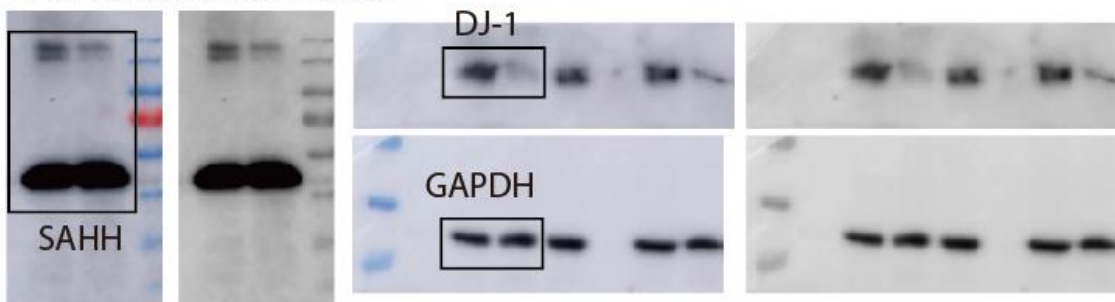

### Supplementary Figure 6j

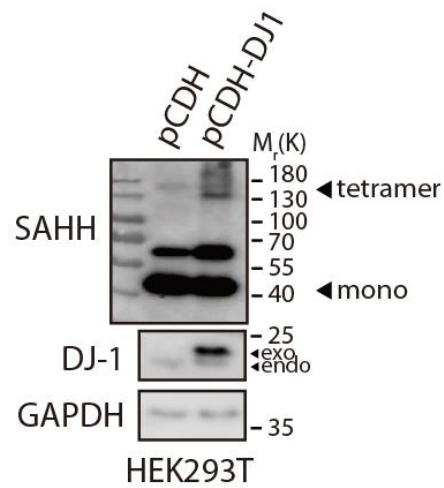

Raw data of western blot:

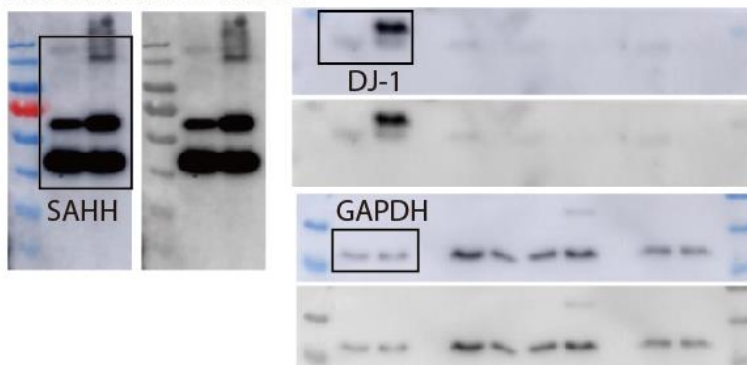

## FACS Sequential Gating Strategies

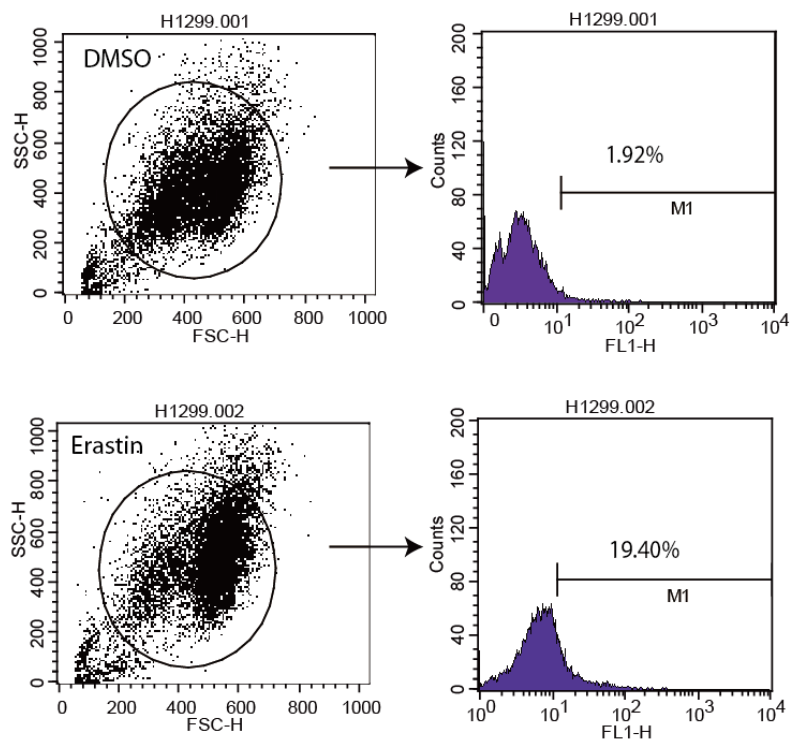

Gating strategy to determine the percentage of cells with Lipid ROS: 10,000 cells are analyzed per condition, the percentage in vehicle group is controlled within 5%, and then the percentage of the other groups are analyzed.

## Raw data in graphs and charts

**Figure 1b**

| H1299     |         |           |           |         |           |           |
|-----------|---------|-----------|-----------|---------|-----------|-----------|
| Lipid ROS | DMSO    |           |           | Erastin |           |           |
|           | Ctrl KD | DJ-1 KD#1 | DJ-1 KD#2 | Ctrl KD | DJ-1 KD#1 | DJ-1 KD#2 |
| 1st       | 1.92    | 3.07      | 2.39      | 19.4    | 59.06     | 34.62     |
| 2nd       | 1.41    | 2.89      | 1.45      | 27.29   | 63.28     | 35.06     |
| 3rd       | 1.16    | 3.36      | 5.93      | 28.3    | 61.28     | 43.46     |
| average   | 1.50    | 3.11      | 3.257     | 25.00   | 61.21     | 37.71     |
| SD        | 0.39    | 0.24      | 2.36      | 4.87    | 2.11      | 4.98      |

**Figure 1d**

| Cell Viability%   | Ctrl KD |       |       | DJ-1 KD#1 |       |       | DJ-1 KD #2 |       |       |
|-------------------|---------|-------|-------|-----------|-------|-------|------------|-------|-------|
| Erastin( $\mu$ M) | 1st     | 2nd   | 3rd   | 1st       | 2nd   | 3rd   | 1st        | 2nd   | 3rd   |
| 0                 | 100     | 100   | 100   | 100       | 100   | 100   | 100        | 100   | 100   |
| 1                 | 83.82   | 74.74 | 91.61 | 36.92     | 43.20 | 46.97 | 63.64      | 71.97 | 66.15 |
| 2                 | 73.12   | 65.59 | 86.07 | 18.52     | 20.20 | 26.66 | 40.32      | 36.10 | 21.46 |
| 4                 | 38.05   | 44.11 | 44.84 | 13.88     | 10.52 | 20.46 | 16.81      | 28.69 | 19.86 |

**Figure 1e**

| Lipid ROS | DMSO    |           |           | Erastin       |           |           |
|-----------|---------|-----------|-----------|---------------|-----------|-----------|
|           | Ctrl KD | DJ-1 KD#1 | DJ-1 KD#2 | Ctrl KD       | DJ-1 KD#1 | DJ-1 KD#2 |
| 1st       | 1.53    | 9.45      | 1.86      | 25.14         | 63.53     | 43.2      |
| 2nd       | 1.87    | 7.18      | 1.12      | 20.08         | 59.42     | 40.13     |
| 3rd       | 1.1     | 12.44     | 1.21      | 29.82         | 60.48     | 41.42     |
| Lipid ROS | Fer-1   |           |           | Erastin+Fer-1 |           |           |
|           | Ctrl KD | DJ-1 KD#1 | DJ-1 KD#2 | Ctrl KD       | DJ-1 KD#1 | DJ-1 KD#2 |
| 1st       | 0.94    | 0.66      | 0.69      | 3.64          | 3.49      | 3.97      |
| 2nd       | 1.59    | 4.86      | 1.96      | 3.85          | 3.97      | 3.84      |
| 3rd       | 0.39    | 1.24      | 0.84      | 2.22          | 5.33      | 3.04      |

**Figure 1f**

| Cell Viability% | DMSO    |           |           | Fer-1         |           |           |        |
|-----------------|---------|-----------|-----------|---------------|-----------|-----------|--------|
|                 | Ctrl KD | DJ-1 KD#1 | DJ-1 KD#2 | Ctrl KD       | DJ-1 KD#1 | DJ-1 KD#2 |        |
|                 | 1st     | 100       | 100       | 100           | 94.23     | 87.45     | 102.23 |
|                 | 2nd     | 100       | 100       | 100           | 98.51     | 105.24    | 109.34 |
| 3rd             | 100     | 100       | 100       | 86.89         | 82.21     | 84.71     |        |
| Cell Viability% | Erastin |           |           | Erastin+Fer-1 |           |           |        |
|                 | Ctrl KD | DJ-1 KD#1 | DJ-1 KD#2 | Ctrl KD       | DJ-1 KD#1 | DJ-1 KD#2 |        |
|                 | 1st     | 63.15     | 19.09     | 20.68         | 95.25     | 93.02     | 96.80  |
|                 | 2nd     | 65.63     | 10.03     | 30.30         | 113.47    | 108.04    | 116.57 |
| 3rd             | 76.06   | 20.60     | 31.44     | 89.86         | 77.98     | 92.78     |        |

**Figure 1g**

| Lipid ROS | DMSO      |           |           |            |            |            |
|-----------|-----------|-----------|-----------|------------|------------|------------|
|           | DJ-1 WT#1 | DJ-1 WT#2 | DJ-1 WT#3 | DJ-1 KO #1 | DJ-1 KO #2 | DJ-1 KO #3 |
| 1st       | 1.47      | 3.57      | 5.75      | 13.5       | 11.02      | 21.2       |
| 2nd       | 2.48      | 3.15      | 6.49      | 13.05      | 25.86      | 13.83      |
| 3rd       | 5.09      | 3.92      | 7.35      | 9.08       | 16.47      | 15.91      |
| Lipid ROS | Erastin   |           |           |            |            |            |
|           | DJ-1 WT#1 | DJ-1 WT#2 | DJ-1 WT#3 | DJ-1 KO #1 | DJ-1 KO #2 | DJ-1 KO #3 |
| 1st       | 15.75     | 13.66     | 24.56     | 67.1       | 60.18      | 94.8       |
| 2nd       | 17.65     | 19.95     | 21.34     | 57.49      | 77.45      | 61.55      |
| 3rd       | 20.14     | 21.13     | 24.78     | 68.18      | 61.12      | 77.58      |

**Figure 1h**

| Cell Viability%   | DJ-1 WT#1 |       |       | DJ-1 WT#2 |       |       | DJ-1 WT#2 |       |       |
|-------------------|-----------|-------|-------|-----------|-------|-------|-----------|-------|-------|
| Erastin( $\mu$ M) | 1st       | 2nd   | 3rd   | 1st       | 2nd   | 3rd   | 1st       | 2nd   | 3rd   |
| 0.0               | 100.0     | 100.0 | 100.0 | 100.0     | 100.0 | 100.0 | 100.0     | 100.0 | 100.0 |
| 1.0               | 96.7      | 93.9  | 91.4  | 87.4      | 93.4  | 102.0 | 92.0      | 90.4  | 92.1  |
| 2.0               | 73.2      | 88.6  | 86.6  | 65.7      | 71.4  | 82.2  | 84.8      | 75.1  | 76.6  |
| 4.0               | 41.9      | 51.9  | 66.1  | 47.1      | 47.6  | 55.9  | 59.7      | 55.2  | 58.9  |
| Cell Viability%   | DJ-1 KO#1 |       |       | DJ-1 KO#2 |       |       | DJ-1 KO#3 |       |       |
| Erastin( $\mu$ M) | 1st       | 2nd   | 3rd   | 1st       | 2nd   | 3rd   | 1st       | 2nd   | 3rd   |
| 0.0               | 100.0     | 100.0 | 100.0 | 100.0     | 100.0 | 100.0 | 100.0     | 100.0 | 100.0 |
| 1.0               | 66.4      | 69.0  | 43.3  | 59.1      | 60.4  | 60.6  | 54.9      | 67.0  | 53.2  |
| 2.0               | 36.1      | 37.6  | 24.3  | 35.8      | 37.2  | 37.7  | 12.8      | 16.0  | 20.1  |
| 4.0               | 14.6      | 16.2  | 10.8  | 15.6      | 17.8  | 19.1  | 2.3       | 2.1   | 3.2   |



**Figure 2b**

| Lipid ROS | DMSO |      | Erastin |       |
|-----------|------|------|---------|-------|
|           | pCDH | DJ-1 | pCDH    | DJ-1  |
| 1st       | 3.56 | 3.4  | 39.12   | 19.98 |
| 2nd       | 2.6  | 3.93 | 39.24   | 12.87 |
| 3rd       | 3.1  | 3.52 | 32.98   | 19.17 |

**Figure 2d**

| Viability% | DMSO |      | Erastin |       |
|------------|------|------|---------|-------|
|            | pCDH | DJ-1 | pCDH    | DJ-1  |
| 1st        | 100  | 100  | 65.34   | 82.23 |
| 2nd        | 100  | 100  | 69.28   | 87.97 |
| 3rd        | 100  | 100  | 56.96   | 84.55 |

**Figure 2f**

| DMSO    | Viability% | pCDH  | WT     | M26I   | E64D   | R98Q  | A104T  | D149A  | G150S  | E163K | L166P  | A171S  |
|---------|------------|-------|--------|--------|--------|-------|--------|--------|--------|-------|--------|--------|
|         | 1st        | 100   | 100    | 100.00 | 100.00 | 100   | 100    | 100.00 | 100.00 | 100   | 100    | 100.00 |
| 2nd     | 100        | 100   | 100.00 | 100.00 | 100    | 100   | 100.00 | 100.00 | 100    | 100   | 100.00 |        |
| 3rd     | 100        | 100   | 100.00 | 100.00 | 100    | 100   | 100.00 | 100.00 | 100    | 100   | 100.00 |        |
| Erastin | Viability% | pCDH  | WT     | M26I   | E64D   | R98Q  | A104T  | D149A  | G150S  | E163K | L166P  | A171S  |
|         | 1st        | 64.25 | 87.98  | 58.75  | 66.32  | 68.48 | 71.88  | 65.34  | 65.93  | 67.56 | 63.84  | 67.79  |
| 2nd     | 64.80      | 80.02 | 62.91  | 58.28  | 52.73  | 43.13 | 55.01  | 59.69  | 52.22  | 44.48 | 50.20  |        |
| 3rd     | 66.01      | 85.55 | 72.84  | 70.69  | 69.24  | 67.16 | 69.96  | 70.35  | 75.61  | 71.01 | 72.11  |        |

**Figure 3b**

| <i>PARK7</i> | RT-PCR  | DMSO    |              |              | Erastin   |              |              |
|--------------|---------|---------|--------------|--------------|-----------|--------------|--------------|
|              |         | Ctrl KD | DJ-1<br>KD#1 | DJ-1<br>KD#2 | Ctrl KD   | DJ-1<br>KD#1 | DJ-1<br>KD#2 |
|              | 1st     | 1       | 0.1431153    | 0.319995     | 1.236419  | 0.1676755    | 0.3012477    |
|              | 2nd     | 1       | 0.0947591    | 0.3102289    | 0.8520126 | 0.1307277    | 0.2605516    |
|              | 3rd     | 1       | 0.1432213    | 0.3445806    | 1.022459  | 0.1863051    | 0.3631594    |
|              | average | 1.0     | 0.1          | 0.3          | 1.0       | 0.2          | 0.3          |

| <i>HMOX1</i> | RT-PCR  | DMSO    |              |              | Erastin  |              |              |
|--------------|---------|---------|--------------|--------------|----------|--------------|--------------|
|              |         | Ctrl KD | DJ-1<br>KD#1 | DJ-1<br>KD#2 | Ctrl KD  | DJ-1<br>KD#1 | DJ-1<br>KD#2 |
|              | 1st     | 1       | 0.8978873    | 0.9575469    | 9.103429 | 20.46168     | 14.46671     |
|              | 2nd     | 1       | 0.7723718    | 0.9903331    | 8.120993 | 18.67486     | 12.40671     |
|              | 3rd     | 1       | 0.9875257    | 0.807406     | 5.80926  | 14.49006     | 10.26945     |
|              | average | 1.0     | 0.9          | 0.9          | 7.7      | 17.9         | 12.4         |

| <i>NQO1</i> | RT-PCR  | DMSO    |              |              | Erastin   |              |              |
|-------------|---------|---------|--------------|--------------|-----------|--------------|--------------|
|             |         | Ctrl KD | DJ-1<br>KD#1 | DJ-1<br>KD#2 | Ctrl KD   | DJ-1<br>KD#1 | DJ-1<br>KD#2 |
|             | 1st     | 1       | 1.2028165    | 1.6329055    | 1.3859409 | 2.22152487   | 1.65260827   |
|             | 2nd     | 1       | 1.2274655    | 1.5505746    | 1.3845477 | 2.32052128   | 1.736374     |
|             | 3rd     | 1       | 0.9511956    | 1.052173     | 1.0412481 | 2.16219389   | 2.15845525   |
|             | average | 1.0     | 1.1          | 1.4          | 1.3       | 2.2          | 1.8          |

| <i>FTH1</i> | RT-PCR  | DMSO    |              |              | Erastin  |              |              |
|-------------|---------|---------|--------------|--------------|----------|--------------|--------------|
|             |         | Ctrl KD | DJ-1<br>KD#1 | DJ-1<br>KD#2 | Ctrl KD  | DJ-1<br>KD#1 | DJ-1<br>KD#2 |
|             | 1st     | 1       | 1.683054     | 1.697155     | 1.779374 | 2.632023     | 2.005453     |
|             | 2nd     | 1       | 1.237224     | 1.593639     | 1.355221 | 2.261182     | 1.72584      |
|             | 3rd     | 1       | 0.9005179    | 1.174268     | 1.15626  | 2.198921     | 1.109866     |
|             | average | 1.0     | 1.3          | 1.5          | 1.4      | 2.4          | 1.6          |

| <i>FTL</i> | RT-PCR  | DMSO    |              |              | Erastin  |              |              |
|------------|---------|---------|--------------|--------------|----------|--------------|--------------|
|            |         | Ctrl KD | DJ-1<br>KD#1 | DJ-1<br>KD#2 | Ctrl KD  | DJ-1<br>KD#1 | DJ-1<br>KD#2 |
|            | 1st     | 1       | 1.457133     | 1.534522     | 1.452414 | 2.033495     | 1.660595     |
|            | 2nd     | 1       | 1.152367     | 1.67094      | 1.373639 | 2.301974     | 1.908602     |
|            | 3rd     | 1       | 1.054884     | 0.9399562    | 1.13939  | 1.641738     | 1.451437     |
|            | average | 1.0     | 1.2          | 1.4          | 1.3      | 2.0          | 1.7          |

| <i>GCLM</i> | RT-PCR  | DMSO    |              |              | Erastin  |              |              |
|-------------|---------|---------|--------------|--------------|----------|--------------|--------------|
|             |         | Ctrl KD | DJ-1<br>KD#1 | DJ-1<br>KD#2 | Ctrl KD  | DJ-1<br>KD#1 | DJ-1<br>KD#2 |
|             | 1st     | 1       | 1.077741     | 1.280183     | 1.912928 | 2.398178     | 1.623199     |
|             | 2nd     | 1       | 1.098732     | 1.361479     | 1.70558  | 2.60857      | 2.186055     |
|             | 3rd     | 1       | 1.174285     | 1.093652     | 1.804077 | 3.698576     | 2.423768     |
|             | average | 1.0     | 1.1          | 1.2          | 1.8      | 2.9          | 2.1          |

**Figure 3c**

|              | RT-PCR  | DMSO    |           | Erastin   |           |
|--------------|---------|---------|-----------|-----------|-----------|
|              |         | Ctrl KD | DJ-1 KD#1 | Ctrl KD   | DJ-1 KD#1 |
| <i>PARK7</i> | 1st     | 1       | 0.142843  | 0.935299  | 0.132448  |
|              | 2nd     | 1       | 0.051154  | 1.193749  | 0.146148  |
|              | 3rd     | 1       | 0.209642  | 0.90532   | 0.194252  |
|              | average | 1       | 0.1345463 | 1.011456  | 0.157616  |
|              | SD      | 0       | 0.0795691 | 0.1585804 | 0.032459  |

|             | RT-PCR  | DMSO    |           | Erastin   |           |
|-------------|---------|---------|-----------|-----------|-----------|
|             |         | Ctrl KD | DJ-1 KD#1 | Ctrl KD   | DJ-1 KD#1 |
| <i>NRF2</i> | 1st     | 1       | 1.102287  | 0.309605  | 0.221212  |
|             | 2nd     | 1       | 0.911617  | 0.373453  | 0.314471  |
|             | 3rd     | 1       | 1.02172   | 0.230206  | 0.256939  |
|             | average | 1       | 1.0118747 | 0.3044213 | 0.264207  |
|             | SD      | 0       | 0.0957155 | 0.071764  | 0.047052  |

**Figure 3d**

| Cell Viability% | DMSO    |         |         |           | Era 1   |         |         |           |
|-----------------|---------|---------|---------|-----------|---------|---------|---------|-----------|
|                 | Ctrl KD | DJ-1 KD | NRF2 KD | Double KD | Ctrl KD | DJ-1 KD | NRF2 KD | Double KD |
| 1st             | 100     | 100     | 100     | 100       | 84.62   | 52.41   | 54.99   | 50.07     |
| 2nd             | 100     | 100     | 100     | 100       | 91.53   | 53.68   | 56.92   | 49.71     |
| 3rd             | 100     | 100     | 100     | 100       | 85.55   | 47.13   | 55.42   | 44.09     |
| Cell Viability% | Era 2   |         |         |           | Era4    |         |         |           |
|                 | Ctrl KD | DJ-1 KD | NRF2 KD | Double KD | Ctrl KD | DJ-1 KD | NRF2 KD | Double KD |
| 1st             | 76.39   | 35.76   | 41.01   | 25.82     | 66.69   | 27.92   | 29.55   | 18.31     |
| 2nd             | 78.67   | 45.63   | 41.39   | 25.96     | 74.72   | 29.16   | 27.86   | 19.79     |
| 3rd             | 75.67   | 32.36   | 35.23   | 18.78     | 65.94   | 21.34   | 31.47   | 9.10      |

**Figure 4a**

| GSH(Fold Change) | DMSO    |           |           | Erastin |           |           |
|------------------|---------|-----------|-----------|---------|-----------|-----------|
|                  | Ctrl KD | DJ-1 KD#1 | DJ-1 KD#2 | Ctrl KD | DJ-1 KD#1 | DJ-1 KD#2 |
| 1st              | 1       | 0.94      | 0.84      | 0.72    | 0.50      | 0.52      |
| 2nd              | 1       | 0.94      | 1.11      | 0.68    | 0.26      | 0.53      |
| 3rd              | 1       | 1.03      | 0.98      | 0.67    | 0.26      | 0.35      |

**Figure 4b**

| Lipid ROS | DMSO    |           |           | Erastin |           |           | Erastin+GSH |           |           | Erastin+NAC |           |           |
|-----------|---------|-----------|-----------|---------|-----------|-----------|-------------|-----------|-----------|-------------|-----------|-----------|
|           | Ctrl KD | DJ-1 KD#1 | DJ-1 KD#2 | Ctrl KD | DJ-1 KD#1 | DJ-1 KD#2 | Ctrl KD     | DJ-1 KD#1 | DJ-1 KD#2 | Ctrl KD     | DJ-1 KD#1 | DJ-1 KD#2 |
| 1st       | 2.24    | 3.4       | 2.99      | 20.95   | 59.12     | 29.21     | 1.56        | 5.61      | 3.43      | 3.15        | 6.91      | 4.68      |
| 2nd       | 2.52    | 3.04      | 3.91      | 19.34   | 47.13     | 29.57     | 5.71        | 3.63      | 5.26      | 1.87        | 3.39      | 3.55      |
| 3rd       | 2.42    | 3.96      | 2.11      | 16.19   | 46.07     | 28.62     | 2.47        | 3.28      | 3.96      | 2.62        | 2.6       | 1.78      |
| average   | 2       | 3         | 3         | 19      | 51        | 29        | 3           | 4         | 4         | 3           | 4         | 3         |

**Figure 4c**

| Cell Viability% | DMSO    |           |           | Erastin |           |           | Erastin+GSH |           |           | Erastin+NAC |           |           |
|-----------------|---------|-----------|-----------|---------|-----------|-----------|-------------|-----------|-----------|-------------|-----------|-----------|
|                 | Ctrl KD | DJ-1 KD#1 | DJ-1 KD#2 | Ctrl KD | DJ-1 KD#1 | DJ-1 KD#2 | Ctrl KD     | DJ-1 KD#1 | DJ-1 KD#2 | Ctrl KD     | DJ-1 KD#1 | DJ-1 KD#2 |
| 1st             | 100     | 100       | 100       | 73.68   | 22.47     | 55.74     | 110.34      | 96.48     | 88.74     | 108.90      | 94.07     | 87.66     |
| 2nd             | 100     | 100       | 100       | 69.21   | 26.80     | 36.55     | 102.92      | 86.65     | 78.29     | 99.77       | 84.79     | 106.05    |
| 3rd             | 100     | 100       | 100       | 66.77   | 18.38     | 40.22     | 115.29      | 94.60     | 86.80     | 105.79      | 91.35     | 85.86     |

**Figure 4d**

| Lipid ROS | DMSO        |           |           | Erastin     |           |           | Erastin+Met |           |           |
|-----------|-------------|-----------|-----------|-------------|-----------|-----------|-------------|-----------|-----------|
|           | Ctrl KD     | DJ-1 KD#1 | DJ-1 KD#2 | Ctrl KD     | DJ-1 KD#1 | DJ-1 KD#2 | Ctrl KD     | DJ-1 KD#1 | DJ-1 KD#2 |
| 1st       | 1.99        | 3.29      | 3.35      | 22.55       | 41.2      | 39        | 8.48        | 51.86     | 32.08     |
| 2nd       | 2.9         | 3.76      | 2.33      | 19.65       | 52.96     | 36.15     | 14.76       | 36.35     | 25.04     |
| 3rd       | 3.26        | 1.95      | 3.15      | 18.87       | 53.02     | 36.55     | 24.07       | 49.16     | 50.17     |
| Lipid ROS | Erastin+SAM |           |           | Erastin+SAH |           |           | Erastin+Hcy |           |           |
|           | Ctrl KD     | DJ-1      | DJ-1      | Ctrl KD     | DJ-1      | DJ-1      | Ctrl KD     | DJ-1      | DJ-1      |
| 1st       | 20.3        | 48.6      | 41.56     | 19.22       | 54.79     | 43.63     | 1.07        | 4.68      | 3.37      |
| 2nd       | 18.79       | 52.12     | 41.22     | 18.54       | 53.33     | 38.05     | 2.47        | 4.31      | 2.63      |
| 3rd       | 19.91       | 38.08     | 31.45     | 20.01       | 36.93     | 27.43     | 2.46        | 3.73      | 5.5       |

**Figure 4e**

| Cell Viability% | DMSO        |           |           | Erastin     |           |           | Erastin+Met |           |           |
|-----------------|-------------|-----------|-----------|-------------|-----------|-----------|-------------|-----------|-----------|
|                 | Ctrl KD     | DJ-1 KD#1 | DJ-1 KD#2 | Ctrl KD     | DJ-1 KD#1 | DJ-1 KD#2 | Ctrl KD     | DJ-1 KD#1 | DJ-1 KD#2 |
| 1st             | 100         | 100       | 100       | 66.477499   | 25.37068  | 40.906145 | 60.616212   | 21.979535 | 32.177828 |
| 2nd             | 100         | 100       | 100       | 63.50162    | 28.855344 | 34.382737 | 79.282996   | 19.375041 | 40.017734 |
| 3rd             | 100         | 100       | 100       | 75.55806    | 17.87007  | 25.55416  | 63.91020    | 25.33789  | 29.17899  |
| Cell Viability% | Erastin+SAM |           |           | Erastin+SAH |           |           | Erastin+Hcy |           |           |
|                 | Ctrl KD     | DJ-1 KD#1 | DJ-1 KD#2 | Ctrl KD     | DJ-1 KD#1 | DJ-1 KD#2 | Ctrl KD     | DJ-1 KD#1 | DJ-1 KD#2 |
| 1st             | 64.047152   | 32.480806 | 37.005704 | 74.146462   | 23.752017 | 37.912197 | 98.077851   | 95.920073 | 94.810229 |
| 2nd             | 56.343832   | 26.338738 | 37.73203  | 66.803153   | 45.345504 | 37.133466 | 96.441515   | 88.749447 | 87.367876 |
| 3rd             | 63.30474    | 40.01914  | 42.17754  | 61.54832    | 39.55842  | 31.20657  | 87.416205   | 93.722895 | 93.832111 |

**Figure 4f**

|              | RT-PCR  | Ctrl KD |           | DJ-1 KD   |           |
|--------------|---------|---------|-----------|-----------|-----------|
|              |         | DMSO    | Erastin   | DMSO      | Erastin   |
| <i>PARK7</i> | 1st     | 1       | 1.0614232 | 0.0318845 | 0.0177997 |
|              | 2nd     | 1       | 0.8990667 | 0.0606226 | 0.0020424 |
|              | 3rd     | 1       | 0.9094083 | 0.1571267 | 0.117644  |
|              | average | 1       | 0.96      | 0.08      | 0.05      |
| <i>CBS</i>   | RT-PCR  | Ctrl KD |           | DJ-1 KD   |           |
|              |         | DMSO    | Erastin   | DMSO      | Erastin   |
|              | 1st     | 1       | 1.53262   | 0.880259  | 2.2330259 |
|              | 2nd     | 1       | 1.4010418 | 1.1785394 | 1.674813  |
|              | 3rd     | 1       | 2.8108374 | 4.2515827 | 1.9345527 |
| average      | 1.00    | 1.91    | 2.10      | 1.95      |           |
| <i>MAT2A</i> | RT-PCR  | Ctrl KD |           | DJ-1 KD   |           |
|              |         | DMSO    | Erastin   | DMSO      | Erastin   |
|              | 1st     | 1       | 0.688725  | 0.9317404 | 0.2411495 |
|              | 2nd     | 1       | 0.9993071 | 0.8919285 | 0.3535534 |
|              | 3rd     | 1       | 0.7583838 | 0.980779  | 0.5318163 |
| average      | 1.00    | 0.82    | 0.93      | 0.38      |           |
| <i>MS</i>    | RT-PCR  | Ctrl KD |           | DJ-1 KD   |           |
|              |         | DMSO    | Erastin   | DMSO      | Erastin   |
|              | 1st     | 1       | 0.9233823 | 1.9738331 | 1.7519966 |
|              | 2nd     | 1       | 0.7528843 | 0.6070974 | 0.5650694 |
|              | 3rd     | 1       | 1.0973319 | 0.738669  | 0.3885036 |
| average      | 1.00    | 0.92    | 1.11      | 0.90      |           |

|              | RT-PCR  | Ctrl KD   |           | DJ-1 KD   |           |
|--------------|---------|-----------|-----------|-----------|-----------|
|              |         | DMSO      | Erastin   | DMSO      | Erastin   |
| <i>BHMT</i>  | 1st     | 1         | 0.4052826 | 0.1753124 | 0.8111272 |
|              | 2nd     | 1         | 1.7684679 | 0.3484443 | 1.3703078 |
|              | 3rd     | 1         | 1.7100044 | 0.5555544 | 4.8736411 |
|              | average | 1.00      | 1.29      | 0.36      | 2.35      |
| <i>MAT1A</i> | RT-PCR  | Ctrl KD   |           | DJ-1 KD   |           |
|              |         | DMSO      | Erastin   | DMSO      | Erastin   |
|              | 1st     | 1         | 2.4897485 | 1.0288267 | 3.2898003 |
|              | 2nd     | 1         | 1.350038  | 1.1176744 | 1.8391001 |
|              | 3rd     | 1         | 1.271913  | 0.6470728 | 2.5561987 |
| average      | 1.00    | 1.70      | 0.93      | 2.56      |           |
| <i>SAHH</i>  | RT-PCR  | Ctrl KD   |           | DJ-1 KD   |           |
|              |         | DMSO      | Erastin   | DMSO      | Erastin   |
|              | 1st     | 1         | 0.9869165 | 0.6853914 | 1.0331144 |
|              | 2nd     | 1         | 1.1586943 | 1.0234921 | 1.3750652 |
| 3rd          | 1       | 1.5669944 | 1.1250585 | 1.5220334 |           |
| average      | 1.00    | 1.24      | 0.94      | 1.31      |           |
| <i>CTH</i>   | RT-PCR  | Ctrl KD   |           | DJ-1 KD   |           |
|              |         | DMSO      | Erastin   | DMSO      | Erastin   |
|              | 1st     | 1         | 4.1828898 | 1.4519583 | 3.8437114 |
|              | 2nd     | 1         | 1.6557674 | 1.8615444 | 1.2158793 |
|              | 3rd     | 1         | 1.9493593 | 1.4544765 | 2.4233453 |
| 4th          | 1       | 1.6318404 | 0.7432915 | 0.856485  |           |
| average      | 1.00    | 2.35      | 1.38      | 2.08      |           |

**Figure 5a**

| H1299            |         |         |         |         |
|------------------|---------|---------|---------|---------|
| Hcy(nmol/<br>mg) | DMSO    |         | Erastin |         |
|                  | Ctrl KD | DJ-1 KD | Ctrl KD | DJ-1 KD |
| 1st              | 7.60    | 4.61    | 6.38    | 3.62    |
| 2nd              | 7.01    | 2.97    | 6.41    | 0.90    |
| 3rd              | 7.48    | 3.76    | 6.96    | 2.64    |

**Figure 5b**

| H1299            |           |           |           |           |           |           |
|------------------|-----------|-----------|-----------|-----------|-----------|-----------|
| Hcy(nmol/<br>mg) | DMSO      |           |           |           |           |           |
|                  | DJ-1 WT#1 | DJ-1 WT#2 | DJ-1 WT#3 | DJ-1 KO#1 | DJ-1 KO#2 | DJ-1 KO#3 |
| 1st              | 8.97      | 7.06      | 9.41      | 3.85      | 2.16      | 3.82      |
| 2nd              | 6.65      | 7.53      | 5.50      | 1.85      | 1.12      | 2.18      |
| 3rd              | 6.70      | 5.09      | 7.00      | 1.64      | 2.04      | 3.70      |
| Hcy(nmol/<br>mg) | Erastin   |           |           |           |           |           |
|                  | DJ-1 WT#1 | DJ-1 WT#2 | DJ-1 WT#3 | DJ-1 KO#1 | DJ-1 KO#2 | DJ-1 KO#3 |
| 1st              | 6.36      | 7.74      | 8.36      | 1.58      | 1.23      | 2.28      |
| 2nd              | 9.47      | 6.16      | 6.35      | 3.38      | 2.74      | 1.20      |
| 3rd              | 7.80      | 7.60      | 7.50      | 1.37      | 2.27      | 4.34      |

**Figure 5c**

| MEF DJ-1 -/-     |      |      |         |      |
|------------------|------|------|---------|------|
| Hcy(nmol/<br>mg) | DMSO |      | Erastin |      |
|                  | pCDH | DJ-1 | pCDH    | DJ-1 |
| 1st              | 3.35 | 4.74 | 3.92    | 4.85 |
| 2nd              | 3.01 | 5.09 | 2.20    | 4.28 |
| 3rd              | 3.61 | 6.88 | 3.20    | 6.49 |

**Figure 5e**

| H1299            |               |         |               |         |
|------------------|---------------|---------|---------------|---------|
| Hcy(nmol/<br>mg) | met(-) SAH(-) |         | met(-) SAH(+) |         |
|                  | Ctrl KD       | DJ-1 KD | Ctrl KD       | DJ-1 KD |
| 1st              | 1.00          | 0.65    | 1.42          | 0.72    |
| 2nd              | 1.00          | 0.67    | 1.17          | 0.66    |
| 3rd              | 1.00          | 0.68    | 1.24          | 0.65    |

**Figure 5f**

| MEF DJ-1 -/-     |               |      |               |      |
|------------------|---------------|------|---------------|------|
| Hcy(nmol/<br>mg) | met(-) SAH(-) |      | met(-) SAH(+) |      |
|                  | pCDH          | DJ-1 | pCDH          | DJ-1 |
| 1st              | 1.00          | 1.22 | 1.09          | 1.88 |
| 2nd              | 1.00          | 1.32 | 1.35          | 2.33 |
| 3rd              | 1.00          | 1.03 | 1.21          | 1.63 |

**Figure 5h**

| time    | Ctrl    | SAHH    | DJ-1 KD<br>SAHH | DJ-1+SAHH |
|---------|---------|---------|-----------------|-----------|
| 0:00:00 | 111.014 | 95.991  | -15.617         | -20.632   |
| 0:00:45 | 56.14   | 207.221 | 80.397          | 119.44    |
| 0:01:30 | 46.38   | 125.943 | 3.571           | 99.9      |
| 0:02:15 | 95.338  | 202.956 | 15.135          | 155.973   |
| 0:03:00 | 68.105  | 166.287 | 11.591          | 112.129   |
| 0:03:45 | 74.512  | 124.485 | 12.582          | 159.197   |
| 0:04:30 | 37.491  | 192.795 | 10.07           | 195.202   |
| 0:05:15 | 55.08   | 275.469 | 21.584          | 102.118   |
| 0:06:00 | 49.293  | 234.321 | 6.645           | 121.54    |
| 0:06:45 | 134.157 | 206.256 | 36.712          | 242.199   |
| 0:07:30 | 86.738  | 237.353 | 1.682           | 180.155   |
| 0:08:15 | 106.795 | 316.247 | 45.719          | 224.011   |
| 0:09:00 | 108.171 | 281.622 | 71.781          | 265.786   |
| 0:09:45 | 122.436 | 285.024 | 67.366          | 242.385   |
| 0:10:30 | 95.302  | 238.009 | 66.851          | 293.919   |
| 0:11:15 | 89.109  | 321.374 | 84.709          | 398.157   |
| 0:12:00 | 129.563 | 318.709 | 98.637          | 422.607   |
| 0:12:45 | 120.622 | 325.288 | 137.182         | 541.537   |
| 0:13:30 | 133.031 | 371.541 | 169.141         | 542.514   |
| 0:14:15 | 117.748 | 525.918 | 160.36          | 640.03    |
| 0:15:00 | 130.496 | 388.427 | 200.876         | 690.781   |
| 0:15:45 | 105.14  | 420.453 | 149.989         | 757.004   |
| 0:16:30 | 158.462 | 480.586 | 192.184         | 787.24    |
| 0:17:15 | 133.943 | 671.742 | 231.752         | 815.625   |
| 0:18:00 | 124.06  | 543.264 | 234.693         | 880.906   |
| 0:18:45 | 140.812 | 602.245 | 284.622         | 978.49    |
| 0:19:30 | 117.052 | 560.837 | 299.763         | 1004.884  |
| 0:20:15 | 120.923 | 601.788 | 332.557         | 968.403   |
| 0:21:00 | 115.704 | 655.813 | 312.656         | 1106.108  |
| 0:21:45 | 138.348 | 654.824 | 376.169         | 1049.707  |
| 0:22:30 | 106.339 | 827.635 | 350.1           | 1242.879  |
| 0:23:15 | 115.396 | 779.858 | 348.992         | 1281.168  |
| 0:24:00 | 124.689 | 724.89  | 397.47          | 1352.034  |
| 0:24:45 | 138.443 | 793.4   | 421.105         | 1382.796  |
| 0:25:30 | 111.798 | 744.772 | 407.062         | 1355.84   |
| 0:26:15 | 91.276  | 978.368 | 445.319         | 1480.771  |
| 0:27:00 | 133.225 | 884.073 | 461.213         | 1510.953  |
| 0:27:45 | 140.222 | 808.219 | 505.381         | 1521.502  |
| 0:28:30 | 107.838 | 835.027 | 507.902         | 1630.47   |
| 0:29:15 | 153.444 | 856.762 | 535.105         | 1664.541  |
| 0:30:00 | 112.698 | 906.05  | 516.79          | 1746.886  |
| 0:30:45 | 106.832 | 990.552 | 546.307         | 1731.646  |
| 0:31:30 | 151.232 | 930.824 | 571.949         | 1758.161  |
| 0:32:15 | 124.45  | 944.921 | 605.315         | 1840.583  |

|         |         |          |         |          |
|---------|---------|----------|---------|----------|
| 0:33:00 | 128.574 | 983.724  | 614.502 | 1912.22  |
| 0:33:45 | 114.056 | 1013.866 | 590.902 | 1863.394 |
| 0:34:30 | 133.177 | 1061.618 | 600.133 | 1986.759 |
| 0:35:15 | 134.951 | 1072.478 | 626.074 | 1967.883 |
| 0:36:00 | 104.392 | 1144.685 | 616.578 | 2032.061 |
| 0:36:45 | 113.362 | 1317.646 | 610.894 | 2097.859 |
| 0:37:30 | 138.628 | 1171.222 | 667.397 | 2105.262 |
| 0:38:15 | 124.226 | 1178.144 | 673.186 | 2089.498 |
| 0:39:00 | 113.357 | 1201.716 | 660.656 | 2122.679 |
| 0:39:45 | 125.232 | 1280.54  | 730.615 | 2148.787 |
| 0:40:30 | 125.686 | 1411.016 | 683.081 | 2218.532 |
| 0:41:15 | 131.846 | 1257.45  | 744.848 | 2321.124 |
| 0:42:00 | 116.071 | 1246.176 | 720.945 | 2260.998 |
| 0:42:45 | 119.803 | 1274.509 | 787.926 | 2334.343 |
| 0:43:30 | 119.975 | 1469.697 | 739.855 | 2387.518 |
| 0:44:15 | 104.345 | 1503.497 | 715.356 | 2401.833 |
| 0:45:00 | 89.169  | 1484.531 | 797.016 | 2403.232 |

**Figure 5j**

| Lipid ROS | DMSO    |           |           | Erastin |           |           |
|-----------|---------|-----------|-----------|---------|-----------|-----------|
|           | Ctrl KD | SAHH KD#1 | SAHH KD#2 | Ctrl KD | SAHH KD#1 | SAHH KD#2 |
| 1st       | 3.53    | 2.26      | 1.94      | 21.76   | 39.99     | 36.57     |
| 2nd       | 3.2     | 7.9       | 1.47      | 28.87   | 37.58     | 50.54     |
| 3rd       | 1.69    | 2.54      | 2.74      | 25.65   | 49.62     | 48.42     |

**Figure 5l**

| Lipid ROS | DMSO    |               |         |               | Erastin |               |         |               |
|-----------|---------|---------------|---------|---------------|---------|---------------|---------|---------------|
|           | Ctrl KD | Ctrl KD+SAH H | DJ-1 KD | DJ-1 KD+SAH H | Ctrl KD | Ctrl KD+SAH H | DJ-1 KD | DJ-1 KD+SAH H |
| 1st       | 2.07    | 7.04          | 4.15    | 5.56          | 21.37   | 24.79         | 67.45   | 51.58         |
| 2nd       | 3.27    | 2.9           | 8.76    | 7.17          | 22.19   | 19.39         | 58.37   | 45.08         |
| 3rd       | 3.17    | 2.4           | 2.64    | 4.71          | 15.43   | 18.14         | 58.16   | 45.2          |

**Figure 5m**

| Cell Viability% | DMSO    |               |         |               | Erastin |               |         |               |
|-----------------|---------|---------------|---------|---------------|---------|---------------|---------|---------------|
|                 | Ctrl KD | Ctrl KD+SAH H | DJ-1 KD | DJ-1 KD+SAH H | Ctrl KD | Ctrl KD+SAH H | DJ-1 KD | DJ-1 KD+SAH H |
| 1st             | 100     | 100           | 100     | 100           | 81.75   | 85.95         | 33.57   | 49.04         |
| 2nd             | 100     | 100           | 100     | 100           | 74.58   | 68.34         | 25.93   | 45.33         |
| 3rd             | 100     | 100           | 100     | 100           | 70.88   | 68.36         | 20.92   | 40.34         |



**Figure 6f**

| Lipid ROS | DMSO    |             |             |         |                 |                 |
|-----------|---------|-------------|-------------|---------|-----------------|-----------------|
|           | Ctrl KD | AHCYL1 KD#1 | AHCYL1 KD#2 | DJ-1 KD | DJ-1 KD+AHC YL1 | DJ-1 KD+AHC YL1 |
| 1st       | 4.7     | 4.17        | 1.55        | 5.45    | 8.16            | 9.21            |
| 2nd       | 3.13    | 4.71        | 2.53        | 5.63    | 10.66           | 7.42            |
| 3rd       | 4.27    | 6.01        | 3.74        | 7.28    | 11.78           | 4.3             |
| Lipid ROS | Erastin |             |             |         |                 |                 |
|           | Ctrl KD | AHCYL1 KD#1 | AHCYL1 KD#2 | DJ-1 KD | DJ-1 KD+AHC YL1 | DJ-1 KD+AHC YL1 |
| 1st       | 19.78   | 24.93       | 18.85       | 62.91   | 31.6            | 36.14           |
| 2nd       | 26.65   | 28.25       | 24.43       | 57.14   | 40.19           | 28.7            |
| 3rd       | 21.75   | 29.59       | 13.95       | 50.57   | 45.12           | 12.12           |

Figure 7a

|                    |         | Relative Tumor Volume |       |       |       |       |        |        |        |        |
|--------------------|---------|-----------------------|-------|-------|-------|-------|--------|--------|--------|--------|
|                    |         | mice                  | 2 day | 4 day | 6 day | 8 day | 10 day | 12 day | 14 day | 16 day |
| Ctrl<br>KD+vehicle | 1       | 2.17                  | 3.09  | 5.31  | 6.34  | 8.71  | 10.15  | 13.18  | 16.52  |        |
|                    | 2       | 1.77                  | 2.89  | 4.75  | 7.24  | 10.46 | 11.33  | 16.51  | 19.19  |        |
|                    | 3       | 1.47                  | 2.40  | 3.29  | 4.12  | 5.81  | 6.14   | 8.55   | 9.92   |        |
|                    | 4       | 2.76                  | 4.16  | 5.46  | 8.12  | 10.31 | 12.56  | 15.09  | 18.67  |        |
|                    | 5       | 1.43                  | 2.39  | 4.02  | 4.74  | 6.54  | 7.19   | 9.71   | 12.86  |        |
|                    | 6       | 1.78                  | 3.00  | 3.60  | 4.73  | 7.59  | 8.67   | 12.31  | 15.11  |        |
|                    | average | 1.90                  | 2.99  | 4.40  | 5.88  | 8.24  | 9.34   | 12.56  | 15.38  |        |
|                    | SEM     | 0.20                  | 0.26  | 0.37  | 0.65  | 0.79  | 1.00   | 1.25   | 1.45   |        |
| Ctrl<br>KD+PE      | 1       | 1.43                  | 2.18  | 3.79  | 4.66  | 5.83  | 6.28   | 8.78   | 11.08  |        |
|                    | 2       | 1.44                  | 1.81  | 2.67  | 3.68  | 4.38  | 4.83   | 6.14   | 7.10   |        |
|                    | 3       | 2.25                  | 4.32  | 5.81  | 8.26  | 9.19  | 10.24  | 16.44  | 20.11  |        |
|                    | 4       | 1.20                  | 1.98  | 3.19  | 4.18  | 5.01  | 5.74   | 7.98   | 9.88   |        |
|                    | 5       | 1.73                  | 2.70  | 3.41  | 4.71  | 5.84  | 5.96   | 8.48   | 10.32  |        |
|                    | 6       | 2.13                  | 2.92  | 4.18  | 5.84  | 8.99  | 11.27  | 15.53  | 18.89  |        |
|                    | average | 1.70                  | 2.65  | 3.84  | 5.22  | 6.54  | 7.39   | 10.56  | 12.90  |        |
|                    | SEM     | 0.17                  | 0.38  | 0.45  | 0.67  | 0.84  | 1.09   | 1.76   | 2.16   |        |
| DJ-1<br>KD+vehicle | 1       | 2.12                  | 3.21  | 5.98  | 7.59  | 10.75 | 11.31  | 15.59  | 18.98  |        |
|                    | 2       | 1.60                  | 2.99  | 4.03  | 5.03  | 6.80  | 7.28   | 9.07   | 11.39  |        |
|                    | 3       | 2.64                  | 3.15  | 4.27  | 6.65  | 11.52 | 12.40  | 20.20  | 25.52  |        |
|                    | 4       | 1.81                  | 2.80  | 4.16  | 4.74  | 6.93  | 7.79   | 10.81  | 13.92  |        |
|                    | 5       | 0.96                  | 1.54  | 2.39  | 7.26  | 12.65 | 14.39  | 20.07  | 27.54  |        |
|                    | 6       | 1.87                  | 2.75  | 3.58  | 4.59  | 6.50  | 7.15   | 9.33   | 11.20  |        |
|                    | average | 1.83                  | 2.74  | 4.07  | 5.98  | 9.20  | 10.05  | 14.18  | 18.09  |        |
|                    | SEM     | 0.23                  | 0.25  | 0.47  | 0.55  | 1.12  | 1.25   | 2.11   | 2.92   |        |
| DJ-1<br>KD+PE      | 1       | 1.16                  | 1.35  | 1.50  | 1.83  | 2.15  | 2.73   | 4.03   | 4.51   |        |
|                    | 2       | 1.11                  | 1.25  | 1.93  | 2.16  | 3.08  | 3.40   | 4.11   | 5.10   |        |
|                    | 3       | 1.03                  | 1.49  | 2.59  | 3.01  | 4.05  | 4.21   | 5.43   | 6.92   |        |
|                    | 4       | 1.14                  | 1.78  | 3.15  | 3.34  | 4.09  | 4.33   | 5.12   | 6.14   |        |
|                    | 5       | 1.49                  | 2.35  | 2.94  | 3.28  | 3.77  | 3.92   | 4.80   | 6.30   |        |
|                    | 6       | 1.23                  | 1.33  | 1.43  | 1.74  | 2.71  | 2.82   | 3.19   | 3.84   |        |
|                    | average | 1.19                  | 1.59  | 2.26  | 2.56  | 3.31  | 3.57   | 4.45   | 5.47   |        |
|                    | SEM     | 0.07                  | 0.17  | 0.30  | 0.30  | 0.32  | 0.28   | 0.34   | 0.48   |        |

**Figure 7e**

| <i>PARK7</i> mRNA level |                 |                 |            |            |
|-------------------------|-----------------|-----------------|------------|------------|
| mice                    | Ctrl KD+vehicle | DJ-1 KD+vehicle | Ctrl KD+PE | DJ-1 KD+PE |
| 1                       | 1.207481        | 0.196827        | 1.539541   | 0.1774519  |
| 2                       | 1.113422        | 0.1871154       | 1.314487   | 0.1632891  |
| 3                       | 1.106497        | 0.1483421       | 1.124669   | 0.1243519  |
| 4                       | 1.092021        | 0.1334157       | 0.9340036  | 0.1187912  |
| 5                       | 0.7994058       | 0.1017429       | 0.6942369  | 0.08977764 |
| 6                       | 0.7700372       | 0.05823378      | 0.6775973  | 0.08388171 |

| <i>PTGS2</i> mRNA level |                 |                 |            |            |
|-------------------------|-----------------|-----------------|------------|------------|
| mice                    | Ctrl KD+vehicle | DJ-1 KD+vehicle | Ctrl KD+PE | DJ-1 KD+PE |
| 1                       | 1.832208        | 1.756962        | 3.217819   | 8.050528   |
| 2                       | 0.8371646       | 1.398697        | 1.666803   | 3.342861   |
| 3                       | 0.4770073       | 1.893537        | 0.5296398  | 4.044842   |
| 4                       | 0.444447        | 0.8559411       | 0.7448817  | 3.226753   |
| 5                       | 1.942727        | 3.237956        | 1.771637   | 8.236796   |
| 6                       | 1.582914        | 1.054883        | 1.665648   | 4.62061    |

**Figure 7f**

| 4-HNE(nmol/mg) |                 |                 |             |             |
|----------------|-----------------|-----------------|-------------|-------------|
| mice           | Ctrl KD+vehicle | DJ-1 KD+vehicle | Ctrl KD+PE  | DJ-1 KD+PE  |
| 1              | 1.139646045     | 2.165889809     | 0.669902618 | 4.284894045 |
| 2              | 2.181755545     | 1.45879763      | 2.782421569 | 2.754146129 |
| 3              | 2.334313446     | 1.658056506     | 1.295664879 | 4.254053616 |
| 4              | 1.273749286     | 1.71565645      | 1.299903816 | 2.201561762 |
| 5              | 1.343446638     | 1.494926061     | 2.229990034 | 2.903064023 |
| 6              | 1.969353081     | 2.556705383     | 2.467343977 | 3.22327044  |

**Figure 7g**

| Hcy(nmol/mg) |                 |                 |            |            |
|--------------|-----------------|-----------------|------------|------------|
| mice         | Ctrl KD+vehicle | DJ-1 KD+vehicle | Ctrl KD+PE | DJ-1 KD+PE |
| 1            | 4.183274        | 3.236154        | 4.090065   | 4.551804   |
| 2            | 4.899978        | 3.542062        | 3.463634   | 2.80992    |
| 3            | 4.913774        | 4.096108        | 4.197987   | 2.078216   |
| 4            | 5.921227        | 4.614164        | 5.916151   | 3.254079   |
| 5            | 6.144533        | 5.123966        | 7.247113   | 3.884564   |
| 6            | 6.336224        | 5.258078        | 7.97195    | 3.654856   |

### Supplementary Figure 1b

| A549      |         |           |           |         |           |           |
|-----------|---------|-----------|-----------|---------|-----------|-----------|
| Lipid ROS | DMSO    |           |           | Erastin |           |           |
|           | Ctrl KD | DJ-1 KD#1 | DJ-1 KD#2 | Ctrl KD | DJ-1 KD#1 | DJ-1 KD#2 |
| 1st       | 2.66    | 2.8       | 2.1       | 14.75   | 24.03     | 22.53     |
| 2nd       | 2.34    | 3.35      | 2.18      | 11.98   | 28.77     | 16.2      |
| 3rd       | 4.32    | 2.26      | 1.67      | 14.06   | 34.49     | 19.68     |

| H292      |         |           |           |         |           |           |
|-----------|---------|-----------|-----------|---------|-----------|-----------|
| Lipid ROS | DMSO    |           |           | Erastin |           |           |
|           | Ctrl KD | DJ-1 KD#1 | DJ-1 KD#2 | Ctrl KD | DJ-1 KD#1 | DJ-1 KD#2 |
| 1st       | 1.9     | 11.78     | 9.44      | 13.04   | 60.97     | 30.58     |
| 2nd       | 5.33    | 11.55     | 3.12      | 17.33   | 37.49     | 39.4      |
| 3rd       | 5.21    | 10.23     | 4.11      | 11.39   | 36.75     | 26.25     |

| H838      |         |           |           |         |           |           |
|-----------|---------|-----------|-----------|---------|-----------|-----------|
| Lipid ROS | DMSO    |           |           | Erastin |           |           |
|           | Ctrl KD | DJ-1 KD#1 | DJ-1 KD#2 | Ctrl KD | DJ-1 KD#1 | DJ-1 KD#2 |
| 1st       | 2.18    | 9.39      | 10.43     | 17.21   | 48.85     | 37.63     |
| 2nd       | 2.22    | 3.85      | 8.77      | 20.16   | 42.09     | 29.93     |
| 3rd       | 3.96    | 3.41      | 9.02      | 15.45   | 37.7      | 38.24     |

### Supplementary Figure 1c

| H1299     |         |           |           |           |
|-----------|---------|-----------|-----------|-----------|
| Lipid ROS | DMSO    |           | Sorafenib |           |
|           | Ctrl KD | DJ-1 KD#1 | Ctrl KD   | DJ-1 KD#1 |
| 1st       | 2.42    | 6.09      | 16.61     | 31.89     |
| 2nd       | 3.14    | 9.89      | 16.64     | 29.54     |
| 3rd       | 3.16    | 6.49      | 12.95     | 26.52     |

| H1299     |         |           |           |         |           |           |
|-----------|---------|-----------|-----------|---------|-----------|-----------|
| Lipid ROS | DMSO    |           |           | RSL-3   |           |           |
|           | Ctrl KD | DJ-1 KD#1 | DJ-1 KD#2 | Ctrl KD | DJ-1 KD#1 | DJ-1 KD#2 |
| 1st       | 1.86    | 2.28      | 1.88      | 24.64   | 42.66     | 34.23     |
| 2nd       | 1.9     | 8.21      | 3.53      | 27.06   | 44.98     | 39.19     |
| 3rd       | 1.25    | 2.48      | 1.37      | 27.16   | 44.8      | 38.18     |

| H1299     |         |           |           |            |           |           |            |           |           |
|-----------|---------|-----------|-----------|------------|-----------|-----------|------------|-----------|-----------|
| Lipid ROS | DMSO    |           |           | ML210-25nM |           |           | ML210-50nM |           |           |
|           | Ctrl KD | DJ-1 KD#1 | DJ-1 KD#2 | Ctrl KD    | DJ-1 KD#1 | DJ-1 KD#2 | Ctrl KD    | DJ-1 KD#1 | DJ-1 KD#2 |
| 1st       | 2.26    | 2.75      | 2.43      | 15.74      | 31.03     | 32.82     | 32.75      | 57.22     | 50.92     |
| 2nd       | 3.96    | 8.02      | 6.77      | 12.8       | 28.87     | 24.08     | 32.19      | 44.12     | 49.49     |
| 3rd       | 2.53    | 7.24      | 4.86      | 21.27      | 42.93     | 37.43     | 39         | 51.83     | 57.61     |

### Supplementary Figure 1e

| Cell Viability%   | Ctrl KD       |       |       | DJ-1 KD#1       |       |       | DJ-1 KD#2       |       |       |
|-------------------|---------------|-------|-------|-----------------|-------|-------|-----------------|-------|-------|
| Erastin( $\mu$ M) | 1st           | 2nd   | 3rd   | 1st             | 2nd   | 3rd   | 1st             | 2nd   | 3rd   |
| 0.0               | 100.0         | 100.0 | 100.0 | 100.0           | 100.0 | 100.0 | 100.0           | 100.0 | 100.0 |
| 1.0               | 83.8          | 80.4  | 91.7  | 43.7            | 52.9  | 47.4  | 63.5            | 71.8  | 66.3  |
| 2.0               | 63.2          | 65.6  | 76.1  | 19.1            | 10.0  | 20.6  | 20.7            | 30.3  | 31.4  |
| 4.0               | 33.7          | 34.2  | 44.2  | 9.1             | 10.2  | 11.6  | 9.7             | 23.8  | 24.6  |
| Cell Viability%   | Ctrl KD+Fer-1 |       |       | DJ-1 KD#1+Fer-1 |       |       | DJ-1 KD#2+Fer-1 |       |       |
| Erastin( $\mu$ M) | 1st           | 2nd   | 3rd   | 1st             | 2nd   | 3rd   | 1st             | 2nd   | 3rd   |
| 0.0               | 94.2          | 98.5  | 86.9  | 87.5            | 105.2 | 82.2  | 102.2           | 109.3 | 84.7  |
| 1.0               | 86.4          | 107.1 | 90.6  | 100.7           | 104.0 | 74.0  | 100.1           | 117.9 | 84.6  |
| 2.0               | 95.3          | 113.5 | 89.9  | 93.0            | 108.0 | 78.0  | 96.8            | 116.6 | 92.8  |
| 4.0               | 92.0          | 110.1 | 88.8  | 96.6            | 109.6 | 77.4  | 111.7           | 115.2 | 88.4  |

### Supplementary Figure 2b

| A2780      |      |      |        |       |       |       |
|------------|------|------|--------|-------|-------|-------|
| Lipid ROS% | E-0  |      | E-1.25 |       | E-2.5 |       |
|            | pCDH | DJ-1 | pCDH   | DJ-1  | pCDH  | DJ-1  |
| 1st        | 1.22 | 1.59 | 42.36  | 41.43 | 65.34 | 64.4  |
| 2nd        | 1.21 | 1.62 | 39.45  | 34.79 | 68.4  | 68.94 |
| 3rd        | 1.67 | 2.52 | 38.47  | 45.16 | 71.26 | 65.22 |

| A2780           |      |      |          |          |          |          |
|-----------------|------|------|----------|----------|----------|----------|
| cell viability% | E-0  |      | E-1.25   |          | E-2.5    |          |
|                 | pCDH | DJ-1 | pCDH     | DJ-1     | pCDH     | DJ-1     |
| 1st             | 100  | 100  | 52.67345 | 43.16028 | 11.45647 | 10.3921  |
| 2nd             | 100  | 100  | 51.7587  | 54.04276 | 9.236475 | 11.3859  |
| 3rd             | 100  | 100  | 61.10212 | 56.2444  | 10.49083 | 9.555048 |

### Supplementary Figure 2c

| 786-O      |      |      |        |       |       |       |
|------------|------|------|--------|-------|-------|-------|
| Lipid ROS% | E-0  |      | E-1.25 |       | E-2.5 |       |
|            | pCDH | DJ-1 | pCDH   | DJ-1  | pCDH  | DJ-1  |
| 1st        | 2.97 | 0.84 | 37.28  | 42.68 | 75.64 | 90.25 |
| 2nd        | 2.22 | 1.56 | 35.12  | 34.67 | 82.27 | 72.08 |
| 3rd        | 2.56 | 4.46 | 35.57  | 33.09 | 86.39 | 75.35 |

| 786-O           |      |      |          |          |          |          |
|-----------------|------|------|----------|----------|----------|----------|
| cell viability% | E-0  |      | E-1.25   |          | E-2.5    |          |
|                 | pCDH | DJ-1 | pCDH     | DJ-1     | pCDH     | DJ-1     |
| 1st             | 100  | 100  | 63.83526 | 64.73385 | 8.703798 | 9.502277 |
| 2nd             | 100  | 100  | 69.25994 | 69.1485  | 9.881099 | 8.089379 |
| 3rd             | 100  | 100  | 66.6741  | 63.49688 | 11.02897 | 13.04159 |

### Supplementary Figure 2d

| KHOS       |      |      |        |       |       |       |       |       |
|------------|------|------|--------|-------|-------|-------|-------|-------|
| Lipid ROS% | E-0  |      | E-1.25 |       | E-2.5 |       | E5    |       |
|            | pCDH | DJ-1 | pCDH   | DJ-1  | pCDH  | DJ-1  | pCDH  | DJ-1  |
| 1st        | 2.75 | 2.72 | 20.75  | 25.23 | 41.3  | 34.61 | 50.86 | 47.12 |
| 2nd        | 3.55 | 2.56 | 18.16  | 19.68 | 46.84 | 49.52 | 50.98 | 58.1  |
| 3rd        | 5.22 | 5.83 | 13.08  | 12.38 | 41.83 | 49.66 | 46.53 | 51.59 |

| KHOS            |      |      |         |          |          |          |          |          |
|-----------------|------|------|---------|----------|----------|----------|----------|----------|
| cell viability% | E-0  |      | E-1.25  |          | E-2.5    |          | E5       |          |
|                 | pCDH | DJ-1 | pCDH    | DJ-1     | pCDH     | DJ-1     | pCDH     | DJ-1     |
| 1st             | 100  | 100  | 54.1580 | 53.99726 | 39.48816 | 42.41154 | 27.3749  | 25.86352 |
| 2nd             | 100  | 100  | 63.3250 | 58.1700  | 41.46363 | 42.84595 | 31.45372 | 28.66266 |
| 3rd             | 100  | 100  | 53.2122 | 54.86722 | 40.89482 | 41.10535 | 27.13766 | 28.84057 |

### Supplementary Figure 2e

| H1299      |      |      |       |       |       |       |       |       |
|------------|------|------|-------|-------|-------|-------|-------|-------|
| Lipid ROS% | E-0  |      | E-2   |       | E-4   |       | E8    |       |
|            | pCDH | DJ-1 | pCDH  | DJ-1  | pCDH  | DJ-1  | pCDH  | DJ-1  |
| 1st        | 2.02 | 3.32 | 18.31 | 14.91 | 37.94 | 34.64 | 59.51 | 63.77 |
| 2nd        | 4.66 | 4.32 | 17.28 | 13.25 | 31.82 | 25.99 | 51.21 | 47.85 |
| 3rd        | 3.79 | 1.95 | 22.6  | 27.02 | 32.17 | 34.49 | 61.45 | 55.72 |

| H1299           |      |      |          |          |          |          |          |          |
|-----------------|------|------|----------|----------|----------|----------|----------|----------|
| cell viability% | E-0  |      | E-2      |          | E-4      |          | E8       |          |
|                 | pCDH | DJ-1 | pCDH     | DJ-1     | pCDH     | DJ-1     | pCDH     | DJ-1     |
| 1st             | 100  | 100  | 53.48798 | 52.27309 | 33.7431  | 34.9595  | 23.39023 | 26.67361 |
| 2nd             | 100  | 100  | 54.37801 | 50.45258 | 36.08823 | 33.3927  | 21.51788 | 25.18962 |
| 3rd             | 100  | 100  | 58.71377 | 55.2554  | 31.32473 | 36.04474 | 17.69928 | 16.00602 |

### Supplementary Figure 2f

| MEF(DJ-1 -/-)   |      |      |              |          |              |          |
|-----------------|------|------|--------------|----------|--------------|----------|
| Cell Viability% | DMSO |      | Sorafenib-20 |          | Sorafenib-50 |          |
|                 | pCDH | DJ-1 | pCDH         | DJ-1     | pCDH         | DJ-1     |
| 1st             | 100  | 100  | 67.93388     | 73.84278 | 41.39893     | 63.62573 |
| 2nd             | 100  | 100  | 63.23328     | 88.19159 | 37.18866     | 57.35727 |
| 3rd             | 100  | 100  | 67.467       | 86.79115 | 43.3272      | 64.4353  |

| MEF(DJ-1 -/-)   |      |      |         |       |          |       |          |       |          |       |
|-----------------|------|------|---------|-------|----------|-------|----------|-------|----------|-------|
| Cell Viability% | DMSO |      | RSL3-50 |       | RSL3-100 |       | RSL3-200 |       | RSL3-400 |       |
|                 | pCDH | DJ-1 | pCDH    | DJ-1  | pCDH     | DJ-1  | pCDH     | DJ-1  | pCDH     | DJ-1  |
| 1st             | 100  | 100  | 82.94   | 84.26 | 69.68    | 66.37 | 51.25    | 50.10 | 40.58    | 36.10 |
| 2nd             | 100  | 100  | 83.00   | 81.21 | 63.87    | 62.69 | 44.91    | 43.25 | 34.12    | 37.92 |
| 3rd             | 100  | 100  | 79.88   | 77.01 | 62.80    | 63.29 | 48.48    | 52.04 | 32.75    | 36.60 |

### Supplementary Figure 2g

| MEF(DJ-1 -/-) |      |      |           |       |           |       |           |       |
|---------------|------|------|-----------|-------|-----------|-------|-----------|-------|
| Lipid ROS%    | DMSO |      | ML210-200 |       | ML210-400 |       | ML210-800 |       |
|               | pCDH | DJ-1 | pCDH      | DJ-1  | pCDH      | DJ-1  | pCDH      | DJ-1  |
| 1st           | 2.92 | 2.52 | 12.37     | 9.57  | 18.44     | 15.34 | 26.74     | 28.71 |
| 2nd           | 3.65 | 6.91 | 16.05     | 15.69 | 17.44     | 17.57 | 27.92     | 29.4  |
| 3rd           | 2.79 | 4.8  | 15.29     | 11.64 | 19.86     | 16.5  | 28.15     | 31.6  |

| MEF(DJ-1 -/-)   |      |      |           |       |           |       |           |       |            |      |
|-----------------|------|------|-----------|-------|-----------|-------|-----------|-------|------------|------|
| Cell Viability% | DMSO |      | ML210-200 |       | ML210-400 |       | ML210-800 |       | ML210-1600 |      |
|                 | pCDH | DJ-1 | pCDH      | DJ-1  | pCDH      | DJ-1  | pCDH      | DJ-1  | pCDH       | DJ-1 |
| 1st             | 100  | 100  | 90.88     | 89.93 | 72.39     | 63.20 | 24.70     | 20.04 | 5.21       | 5.72 |
| 2nd             | 100  | 100  | 74.00     | 70.92 | 56.88     | 55.09 | 18.53     | 24.05 | 1.41       | 6.47 |
| 3rd             | 100  | 100  | 92.43     | 88.15 | 75.55     | 64.51 | 23.43     | 16.19 | 1.98       | 1.18 |

**Supplementary Figure 3b**

| Cystine uptake(% of control) |         |           |           |
|------------------------------|---------|-----------|-----------|
|                              | Ctrl KD | DJ-1 KD#1 | DJ-1 KD#2 |
| 1st                          | 100     | 94.854    | 95.2943   |
| 2nd                          | 100     | 102.1363  | 107.3985  |
| 3rd                          | 100     | 107.3046  | 108.6444  |

**Supplementary Figure 3c**

| Cysteine(nmol/mg) |          |           |           |
|-------------------|----------|-----------|-----------|
|                   | Ctrl KD  | DJ-1 KD#1 | DJ-1 KD#2 |
| 1st               | 38.23212 | 38.83099  | 44.56377  |
| 2nd               | 35.71423 | 36.07329  | 37.84653  |
| 3rd               | 42.27617 | 51.71946  | 41.79197  |

**Supplementary Figure 3d**

| GSH(Fold Change) | DMSO      |           |           |           |           |           |
|------------------|-----------|-----------|-----------|-----------|-----------|-----------|
|                  | DJ-1 WT#1 | DJ-1 WT#2 | DJ-1 WT#3 | DJ-1 KO#1 | DJ-1 KO#2 | DJ-1 KO#3 |
| 1st              | 1         | 1.00      | 1.00      | 0.94      | 0.95      | 0.93      |
| 2nd              | 1         | 1.00      | 1.00      | 0.90      | 1.14      | 1.10      |
| 3rd              | 1         | 1.00      | 1.00      | 1.15      | 0.97      | 1.09      |
| GSH(Fold Change) | Erastin   |           |           |           |           |           |
|                  | DJ-1 WT#1 | DJ-1 WT#2 | DJ-1 WT#3 | DJ-1 KO#1 | DJ-1 KO#2 | DJ-1 KO#3 |
| 1st              | 0.73      | 0.65      | 0.80      | 0.16      | 0.16      | 0.17      |
| 2nd              | 0.70      | 0.70      | 0.64      | 0.14      | 0.12      | 0.14      |
| 3rd              | 0.61      | 0.67      | 0.42      | 0.17      | 0.17      | 0.21      |

**Supplementary Figure 3g**

| Lipid ROS% | DMSO |      | Erastin |       | Erastin+Hcy |       | Erastin+GSH |      |
|------------|------|------|---------|-------|-------------|-------|-------------|------|
|            | Ctrl | BSO  | Ctrl    | BSO   | Ctrl        | BSO   | Ctrl        | BSO  |
| 1st        | 1.96 | 2.1  | 16.67   | 33.53 | 3.4         | 29.21 | 3.07        | 5.62 |
| 2nd        | 2.22 | 3.29 | 24.34   | 43.62 | 5.37        | 43.31 | 5.52        | 7.55 |
| 3rd        | 2.31 | 2.84 | 24.62   | 42.85 | 7.14        | 33.55 | 5.13        | 7.61 |



### Supplementary Figure 4b

| Relative level | SAM     |         | SAH     |         | Hcy     |         |
|----------------|---------|---------|---------|---------|---------|---------|
|                | Ctrl KD | DJ-1 KD | Ctrl KD | DJ-1 KD | Ctrl KD | DJ-1 KD |
| 1st            | 1       | 1.08    | 1.00    | 0.95    | 1.00    | 0.57    |
| 2nd            | 1       | 1.02    | 1.00    | 1.16    | 1.00    | 0.73    |
| 3rd            | 1       | 1.09    | 1.00    | 1.21    | 1.00    | 0.61    |

### Supplementary Figure 4c

| SAM                 |         |         |         |         |
|---------------------|---------|---------|---------|---------|
| Percentage of total | M+0     |         | M+1     |         |
|                     | Ctrl KD | DJ-1 KD | Ctrl KD | DJ-1 KD |
| 1st                 | 1.96    | 1.78    | 98.04   | 98.22   |
| 2nd                 | 4.46    | 3.04    | 95.54   | 96.96   |
| 3rd                 | 2.13    | 2.36    | 97.87   | 97.64   |
| SAH                 |         |         |         |         |
| Percentage of total | M+0     |         | M+1     |         |
|                     | Ctrl KD | DJ-1 KD | Ctrl KD | DJ-1 KD |
| 1st                 | 15.95   | 13.46   | 84.05   | 86.54   |
| 2nd                 | 26.29   | 29.30   | 73.71   | 70.70   |
| 3rd                 | 17.34   | 14.18   | 82.66   | 85.82   |
| Hcy                 |         |         |         |         |
| Percentage of total | M+0     |         | M+1     |         |
|                     | Ctrl KD | DJ-1 KD | Ctrl KD | DJ-1 KD |
| 1st                 | 97.71   | 99.11   | 2.29    | 0.89    |
| 2nd                 | 97.94   | 99.22   | 2.06    | 0.78    |
| 3rd                 | 98.14   | 99.30   | 1.86    | 0.70    |

| Hcy(M+1)            |         |         |
|---------------------|---------|---------|
| Percentage of total | M+1     |         |
|                     | Ctrl KD | DJ-1 KD |
| 1st                 | 2.29    | 0.89    |
| 2nd                 | 2.06    | 0.78    |
| 3rd                 | 1.86    | 0.70    |

### Supplementary Figure 4d

| PANC1         |          |          |          |          |
|---------------|----------|----------|----------|----------|
| Hcy(nmol /mg) | DMSO     |          | Erastin  |          |
|               | Ctrl KD  | DJ-1 KD  | Ctrl KD  | DJ-1 KD  |
| 1st           | 6.000191 | 3.501541 | 4.507901 | 3.07959  |
| 2nd           | 6.009448 | 4.302024 | 5.025589 | 3.803704 |
| 3rd           | 4.789776 | 2.542913 | 4.200386 | 2.10897  |

**Supplementary Figure 4e**

| H1299            |          |          |          |          |
|------------------|----------|----------|----------|----------|
| SAH(nmo<br>l/mg) | DMSO     |          | Erastin  |          |
|                  | Ctrl KD  | DJ-1 KD  | Ctrl KD  | DJ-1 KD  |
| 1st              | 5.52114  | 4.838656 | 4.270894 | 4.915921 |
| 2nd              | 4.284214 | 4.261959 | 4.273416 | 4.930195 |
| 3rd              | 4.022115 | 4.12224  | 4.044125 | 4.122955 |

| PANC1            |          |          |          |          |
|------------------|----------|----------|----------|----------|
| SAH(nmo<br>l/mg) | DMSO     |          | Erastin  |          |
|                  | Ctrl KD  | DJ-1 KD  | Ctrl KD  | DJ-1 KD  |
| 1st              | 3.235745 | 3.207916 | 3.336828 | 2.970742 |
| 2nd              | 3.869756 | 4.102205 | 4.270276 | 3.040274 |
| 3rd              | 3.806759 | 3.774019 | 3.92568  | 3.49499  |

| MEF(DJ-1 -/-)    |          |          |          |          |
|------------------|----------|----------|----------|----------|
| SAH(nmo<br>l/mg) | DMSO     |          | Erastin  |          |
|                  | pCDH     | DJ-1     | pCDH     | DJ-1     |
| 1st              | 1.895573 | 1.877357 | 1.824958 | 0.938977 |
| 2nd              | 1.748835 | 1.800224 | 1.456403 | 1.53506  |
| 3rd              | 1.974413 | 2.295149 | 2.184557 | 1.880867 |

**Supplementary Figure 4f**

| MEF(DJ-1 -/-)    |      |      |       |      |         |      |       |      |
|------------------|------|------|-------|------|---------|------|-------|------|
| HCY(nmol<br>/mg) | DMSO |      |       |      | Erastin |      |       |      |
|                  | pCDH | M26I | A104T | WT   | pCDH    | M26I | A104T | WT   |
| 1st              | 3.55 | 3.92 | 3.30  | 4.36 | 3.60    | 3.49 | 3.76  | 4.59 |
| 2nd              | 3.17 | 3.31 | 3.37  | 4.73 | 3.38    | 3.46 | 3.52  | 4.63 |
| 3rd              | 3.67 | 3.44 | 3.08  | 5.60 | 3.33    | 3.35 | 3.47  | 5.99 |

| MEF(DJ-1 -/-)    |      |      |       |      |         |      |       |      |
|------------------|------|------|-------|------|---------|------|-------|------|
| SAH(nmol<br>/mg) | DMSO |      |       |      | Erastin |      |       |      |
|                  | pCDH | M26I | A104T | WT   | pCDH    | M26I | A104T | WT   |
| 1st              | 1.58 | 1.59 | 1.61  | 1.63 | 1.85    | 1.87 | 1.80  | 1.79 |
| 2nd              | 1.62 | 1.48 | 1.46  | 1.83 | 1.47    | 1.48 | 1.88  | 1.60 |
| 3rd              | 1.43 | 1.60 | 1.69  | 1.44 | 1.86    | 1.24 | 1.65  | 1.56 |

### Supplementary Figure 4g

| MEF DJ-1 <sup>-/-</sup> |               |      |       |      |               |      |       |      |
|-------------------------|---------------|------|-------|------|---------------|------|-------|------|
| Hcy(nmol/<br>mg)        | met(-) SAH(-) |      |       |      | met(-) SAH(+) |      |       |      |
|                         | pCDH          | M26I | A104T | DJ-1 | pCDH          | M26I | A104T | DJ-1 |
| 1st                     | 1             | 1.11 | 0.96  | 1.44 | 1.19          | 1.25 | 1.30  | 1.70 |
| 2nd                     | 1             | 0.96 | 0.91  | 1.14 | 1.27          | 1.31 | 1.10  | 2.22 |
| 3rd                     | 1             | 1.06 | 1.06  | 1.34 | 1.18          | 1.22 | 1.24  | 2.06 |

### Supplementary Figure 4i

| time    | pCDH   | M26I  | A104T  | WT   |
|---------|--------|-------|--------|------|
| 0:00:00 | -180.9 | -68.4 | 171.18 | 50.3 |
| 0:00:45 | -163.2 | 11.8  | 463.82 | 46   |
| 0:01:30 | -174.6 | 87.3  | 504.01 | 81.8 |
| 0:02:15 | -150.6 | 65.6  | 239.81 | 124  |
| 0:03:00 | -100.2 | 44.7  | 487.79 | 220  |
| 0:03:45 | -38.13 | 49    | 305.23 | 243  |
| 0:04:30 | 38.302 | 101   | 193.77 | 250  |
| 0:05:15 | 12.13  | 253   | 611.22 | 333  |
| 0:06:00 | 56.971 | 280   | 493.95 | 465  |
| 0:06:45 | 98.411 | 91.9  | 262.09 | 585  |
| 0:07:30 | 138.49 | 274   | 694.06 | 659  |
| 0:08:15 | 14.047 | 307   | 554.29 | 658  |
| 0:09:00 | 133.93 | 197   | 207.59 | 736  |
| 0:09:45 | 14.036 | 291   | 729.96 | 742  |
| 0:10:30 | 204.23 | 481   | 466.84 | 955  |
| 0:11:15 | 196.68 | 456   | 654.44 | 955  |
| 0:12:00 | 188.08 | 445   | 761.81 | 977  |
| 0:12:45 | 83.549 | 457   | 274.54 | 995  |
| 0:13:30 | 196.94 | 480   | 651.66 | 998  |
| 0:14:15 | 278.21 | 574   | 551.75 | 1124 |
| 0:15:00 | 340.16 | 615   | 604.73 | 1259 |
| 0:15:45 | 139.3  | 679   | 731.23 | 1331 |
| 0:16:30 | 225.59 | 711   | 566.45 | 1479 |
| 0:17:15 | 315.82 | 739   | 584.4  | 1401 |
| 0:18:00 | 304.49 | 737   | 747.94 | 1419 |
| 0:18:45 | 357.8  | 737   | 658.47 | 1474 |
| 0:19:30 | 344.72 | 808   | 591.82 | 1508 |
| 0:20:15 | 323.03 | 796   | 840.22 | 1617 |
| 0:21:00 | 304.65 | 541   | 813.45 | 1602 |
| 0:21:45 | 374.13 | 553   | 702.1  | 1647 |
| 0:22:30 | 437.87 | 483   | 717.89 | 1672 |
| 0:23:15 | 402.99 | 610   | 789.88 | 1611 |
| 0:24:00 | 477.57 | 638   | 839.49 | 1730 |
| 0:24:45 | 446.52 | 750   | 884.23 | 1827 |
| 0:25:30 | 451.86 | 876   | 1031.6 | 1726 |
| 0:26:15 | 456.55 | 965   | 974.74 | 1734 |
| 0:27:00 | 572.7  | 1008  | 915.99 | 1856 |

|         |        |      |        |      |
|---------|--------|------|--------|------|
| 0:27:45 | 523.41 | 1089 | 968.44 | 1810 |
| 0:28:30 | 499.08 | 1140 | 884.03 | 1833 |
| 0:29:15 | 577.73 | 1161 | 906.64 | 1829 |
| 0:30:00 | 561.92 | 1205 | 1090.4 | 1765 |
| 0:30:45 | 546.15 | 1198 | 1054.2 | 1920 |
| 0:31:30 | 572.73 | 1132 | 1056.3 | 2127 |
| 0:32:15 | 604.61 | 1065 | 977.3  | 1897 |
| 0:33:00 | 586.11 | 1096 | 992.73 | 2081 |
| 0:33:45 | 734.85 | 1089 | 924.55 | 2221 |
| 0:34:30 | 766.99 | 1141 | 1093.4 | 2159 |
| 0:35:15 | 721.11 | 1176 | 832.21 | 2137 |
| 0:36:00 | 904.4  | 1280 | 1116.4 | 2181 |
| 0:36:45 | 815.6  | 1113 | 981.66 | 2167 |
| 0:37:30 | 745.78 | 1270 | 1159   | 2163 |
| 0:38:15 | 866.42 | 1216 | 1049.3 | 2277 |
| 0:39:00 | 1014.7 | 1394 | 1106.1 | 2385 |
| 0:39:45 | 549.55 | 1311 | 1076.6 | 2433 |
| 0:40:30 | 828.13 | 1360 | 1080.5 | 2635 |
| 0:41:15 | 623.69 | 1455 | 1026.7 | 2660 |
| 0:42:00 | 864.76 | 1473 | 1078.2 | 2717 |
| 0:42:45 | 714.98 | 1470 | 1217.4 | 2656 |
| 0:43:30 | 826.41 | 1417 | 1222.2 | 2782 |
| 0:44:15 | 638.37 | 1444 | 1226.5 | 2915 |
| 0:45:00 | 946.24 | 1401 | 1261   | 3041 |

**Supplementary Figure 5b**

| time    | IgG     | Ctrl KD | DJ-1 KD#1 | DJ-1 KD#2 |
|---------|---------|---------|-----------|-----------|
| 0:00:00 | 46.865  | 401.412 | 250.203   | 457.556   |
| 0:00:45 | 30.992  | 385.915 | 310.791   | 242.738   |
| 0:01:30 | 84.172  | 458.471 | 307.051   | 260.922   |
| 0:02:15 | 83.363  | 458.962 | 320.105   | 315.118   |
| 0:03:00 | 107.259 | 381.023 | 284.141   | 302.986   |
| 0:03:45 | 99.771  | 369.06  | 293.548   | 268.584   |
| 0:04:30 | 72.4    | 364.86  | 318.903   | 342.246   |
| 0:05:15 | 80.385  | 398.254 | 335.634   | 326.251   |
| 0:06:00 | 21.257  | 437.472 | 307.183   | 352.304   |
| 0:06:45 | 84.719  | 450.231 | 268.831   | 360.061   |
| 0:07:30 | 77.882  | 448.086 | 290.063   | 317.012   |
| 0:08:15 | 77.141  | 466.635 | 242.002   | 278.417   |
| 0:09:00 | 65.411  | 426.478 | 231.772   | 373.74    |
| 0:09:45 | 88.194  | 472.179 | 206.194   | 347.082   |
| 0:10:30 | 56.322  | 429.192 | 253.747   | 300.585   |
| 0:11:15 | 81.509  | 563.701 | 283.843   | 316.233   |
| 0:12:00 | 51.653  | 525.254 | 314.531   | 405.731   |
| 0:12:45 | 92.71   | 494.955 | 353.353   | 363.925   |
| 0:13:30 | 81.634  | 552.058 | 379.972   | 353.303   |
| 0:14:15 | 63.959  | 536.916 | 323.328   | 366.33    |
| 0:15:00 | 55.585  | 539.207 | 342.883   | 371.056   |
| 0:15:45 | 36.545  | 626.769 | 313.669   | 415.173   |
| 0:16:30 | 99.01   | 592.831 | 396.571   | 483.036   |
| 0:17:15 | 52.551  | 601.86  | 309.401   | 461.123   |
| 0:18:00 | 77.149  | 664.965 | 393.804   | 387.832   |
| 0:18:45 | 59.653  | 640.541 | 372.903   | 469.877   |
| 0:19:30 | 52.356  | 617.002 | 418.294   | 445.895   |
| 0:20:15 | 57.884  | 605.161 | 393.029   | 357.169   |
| 0:21:00 | 15.286  | 706.385 | 437.529   | 428.276   |
| 0:21:45 | 30.467  | 710.452 | 396.112   | 390.702   |
| 0:22:30 | 26.335  | 736.194 | 474.042   | 416.598   |
| 0:23:15 | 20.292  | 719.556 | 386.254   | 421.796   |
| 0:24:00 | 111.675 | 816.473 | 419.669   | 430.656   |
| 0:24:45 | 101.429 | 849.861 | 421.934   | 378.664   |
| 0:25:30 | 90.19   | 750.623 | 442.409   | 388.484   |
| 0:26:15 | 131.386 | 829.026 | 496.435   | 377.918   |
| 0:27:00 | 87.399  | 826.242 | 410.672   | 408.435   |
| 0:27:45 | 130.553 | 870.613 | 382.604   | 454.364   |
| 0:28:30 | 115.448 | 819.056 | 425.508   | 443.936   |
| 0:29:15 | 118.048 | 905.787 | 417.292   | 496.782   |
| 0:30:00 | 110.213 | 952.07  | 406.58    | 366.839   |
| 0:30:45 | 95.655  | 979.467 | 494.625   | 460.466   |
| 0:31:30 | 233.774 | 870.915 | 443.324   | 475.682   |
| 0:32:15 | 95.855  | 913.334 | 438.42    | 451.338   |
| 0:33:00 | 96.629  | 973.191 | 432.536   | 473.153   |

|         |         |          |         |         |
|---------|---------|----------|---------|---------|
| 0:33:45 | 209.695 | 945.776  | 558.951 | 433.483 |
| 0:34:30 | 85.28   | 1051.613 | 457.979 | 421.624 |
| 0:35:15 | 171.206 | 1106.193 | 474.322 | 374.717 |
| 0:36:00 | 172.359 | 1083.728 | 531.928 | 341.703 |
| 0:36:45 | 192.545 | 1035.101 | 529.01  | 437.601 |
| 0:37:30 | 157.9   | 1167.415 | 464.081 | 420.461 |
| 0:38:15 | 115.316 | 1052.083 | 517.249 | 398.992 |
| 0:39:00 | 95.31   | 978.978  | 482.99  | 451.663 |
| 0:39:45 | 70.426  | 1056.732 | 502.562 | 407.61  |
| 0:40:30 | 130.304 | 1078.536 | 521.575 | 521.35  |
| 0:41:15 | 191.877 | 1056.639 | 487     | 516.224 |
| 0:42:00 | 193.696 | 1020.901 | 528.819 | 498.482 |
| 0:42:45 | 202.128 | 969.655  | 519.107 | 465.362 |
| 0:43:30 | 188.159 | 1168.702 | 546.242 | 476.856 |
| 0:44:15 | 130.312 | 1096.857 | 525.63  | 404.166 |
| 0:45:00 | 139.316 | 1209.678 | 535.388 | 520.061 |

### Supplementary Figure 5c

| SAH administration |         |               |         |               |         |               |         |               |
|--------------------|---------|---------------|---------|---------------|---------|---------------|---------|---------------|
| Lipid ROS%         | DMSO    |               |         |               | Erastin |               |         |               |
|                    | Ctrl KD | Ctrl KD+SAH H | DJ-1 KD | DJ-1 KD+SAH H | Ctrl KD | Ctrl KD+SAH H | DJ-1 KD | DJ-1 KD+SAH H |
| 1st                | 2.06    | 5.97          | 4.68    | 5.25          | 22.81   | 23.17         | 56.78   | 37.07         |
| 2nd                | 1.97    | 2.81          | 6.95    | 8.14          | 20.58   | 23.86         | 53.26   | 31.38         |
| 3rd                | 4.75    | 6.45          | 9.11    | 11.37         | 12.24   | 21.47         | 64.01   | 34.25         |

### Supplementary Figure 5d

| SAH administration |         |               |         |               |         |               |         |               |
|--------------------|---------|---------------|---------|---------------|---------|---------------|---------|---------------|
| Cell Viability%    | DMSO    |               |         |               | Erastin |               |         |               |
|                    | Ctrl KD | Ctrl KD+SAH H | DJ-1 KD | DJ-1 KD+SAH H | Ctrl KD | Ctrl KD+SAH H | DJ-1 KD | DJ-1 KD+SAH H |
| 1st                | 100     | 100           | 100     | 100           | 69.03   | 64.37         | 31.96   | 64.10         |
| 2nd                | 100     | 100           | 100     | 100           | 68.80   | 74.19         | 25.66   | 55.33         |
| 3rd                | 100     | 100           | 100     | 100           | 85.50   | 85.83         | 21.87   | 63.42         |

**Supplementary Figure 5e**

| time    | r-SAHH   | r-SAHH+r-DJ-1 | r-SAHH+BSA |
|---------|----------|---------------|------------|
| 0:00:00 | 24462.91 | 16671.52      | 16650.73   |
| 0:00:45 | 28418.75 | 20454.03      | 20220.86   |
| 0:01:30 | 36007.32 | 27103.25      | 27049.37   |
| 0:02:15 | 43100.18 | 33300.17      | 32963.07   |
| 0:03:00 | 49521.42 | 39148.89      | 39143.71   |
| 0:03:45 | 55645.18 | 45351.59      | 45521.72   |
| 0:04:30 | 59749.86 | 49593.37      | 50555.88   |
| 0:05:15 | 64618.05 | 54716.26      | 56035.1    |
| 0:06:00 | 68500.29 | 59847.77      | 60709.53   |
| 0:06:45 | 73888.52 | 65161.47      | 65976.34   |
| 0:07:30 | 75571.51 | 68633.89      | 69058.56   |
| 0:08:15 | 76415.5  | 69408.88      | 69745.27   |
| 0:09:00 | 78943.32 | 73474.35      | 71763.75   |
| 0:09:45 | 80804.11 | 75644.29      | 74853.5    |
| 0:10:30 | 81440.24 | 77433.67      | 78739.12   |
| 0:11:15 | 81328.3  | 79285.94      | 77699.76   |
| 0:12:00 | 82287.23 | 78277.48      | 79109.38   |
| 0:12:45 | 82786.91 | 82395.82      | 81286.81   |
| 0:13:30 | 81995.68 | 81760.99      | 80732.26   |
| 0:14:15 | 83690.06 | 84553.51      | 83108.03   |
| 0:15:00 | 82127.54 | 83183.07      | 83654.58   |
| 0:15:45 | 82547.12 | 83650.72      | 83616.93   |
| 0:16:30 | 83278.46 | 83818.1       | 84408.84   |
| 0:17:15 | 82854.75 | 84502.48      | 84987.27   |
| 0:18:00 | 82221.49 | 82502.08      | 83914.13   |
| 0:18:45 | 82418.25 | 82890.89      | 83868.63   |
| 0:19:30 | 81117.44 | 84079.54      | 85182.44   |
| 0:20:15 | 82175.69 | 85766.52      | 84790.68   |
| 0:21:00 | 78389.25 | 82022.21      | 83563.6    |
| 0:21:45 | 79470.62 | 81097.93      | 84492.15   |
| 0:22:30 | 78819.19 | 80619.58      | 82320.79   |
| 0:23:15 | 78991.26 | 81179.83      | 83023.43   |
| 0:24:00 | 78680.92 | 83229.82      | 81746.34   |
| 0:24:45 | 77937.02 | 84347.4       | 82580.92   |
| 0:25:30 | 78072.44 | 83664.8       | 81823.29   |
| 0:26:15 | 77548.02 | 83829.35      | 82540.59   |
| 0:27:00 | 77859.01 | 81322.87      | 83666.17   |
| 0:27:45 | 77226.37 | 80786.06      | 81917.73   |
| 0:28:30 | 75892.12 | 82562.83      | 80987.07   |
| 0:29:15 | 76828.89 | 82207.93      | 82985.16   |
| 0:30:00 | 75672.18 | 81997.66      | 82578.99   |
| 0:30:45 | 75656.31 | 82091.66      | 80419.59   |
| 0:31:30 | 75082.36 | 82079.86      | 82138.1    |
| 0:32:15 | 73816.29 | 78052.22      | 80745.94   |

|         |          |          |          |
|---------|----------|----------|----------|
| 0:33:00 | 73698.93 | 81312.09 | 81284.94 |
| 0:33:45 | 74554.67 | 81446.67 | 83863.68 |
| 0:34:30 | 72902.24 | 81948.56 | 81170.09 |
| 0:35:15 | 72310.41 | 77995.37 | 79774.69 |
| 0:36:00 | 71178.99 | 78913.85 | 77957.13 |
| 0:36:45 | 72270.05 | 79544.81 | 82387.21 |
| 0:37:30 | 70889.2  | 79736.68 | 78228.65 |
| 0:38:15 | 70692.62 | 76536.1  | 77904.96 |
| 0:39:00 | 70788.3  | 79465.62 | 78328.88 |
| 0:39:45 | 70146.43 | 79538.44 | 78677.01 |
| 0:40:30 | 69411.09 | 77933.24 | 77535.89 |
| 0:41:15 | 69952.02 | 77141.35 | 75555.85 |
| 0:42:00 | 68226    | 77986.35 | 76288    |
| 0:42:45 | 68790.82 | 76839.94 | 77379.47 |
| 0:43:30 | 69031.51 | 78059.89 | 77400.33 |
| 0:44:15 | 66982.36 | 75705.05 | 74300.12 |
| 0:45:00 | 67145.83 | 75867.09 | 75093.71 |



**Supplementary Figure 6a**

| Flag/HA         |      |         |         |
|-----------------|------|---------|---------|
| Relative levels | Ctrl | DJ-1 OE | DJ-1 KD |
| 1st             | 1    | 0.32    | 1.18    |
| 2nd             | 1    | 0.45    | 1.25    |
| 3rd             | 1    | 0.77    | 1.23    |

**Supplementary Figure 6b**

| SAHH/AHCYL1     |         |           |           |
|-----------------|---------|-----------|-----------|
| Relative levels | Ctrl KD | DJ-1 KD#1 | DJ-1 KD#2 |
| 1st             | 1       | 1.39      | 1.20      |
| 2nd             | 1       | 1.09      | 1.12      |
| 3rd             | 1       | 1.28      | 1.07      |

**Supplementary Figure 6d**

| Cell Viability% | DMSO    |             |             |         |                |                |
|-----------------|---------|-------------|-------------|---------|----------------|----------------|
|                 | Ctrl KD | AHCYL1 KD#1 | AHCYL1 KD#2 | DJ-1 KD | DJ-1 KD+AHCYL1 | DJ-1 KD+AHCYL1 |
| 1st             | 100     | 100         | 100         | 100     | 100            | 100            |
| 2nd             | 100     | 100         | 100         | 100     | 100            | 100            |
| 3rd             | 100     | 100         | 100         | 100     | 100            | 100            |
| Cell Viability% | Erastin |             |             |         |                |                |
|                 | Ctrl KD | AHCYL1 KD#1 | AHCYL1 KD#2 | DJ-1 KD | DJ-1 KD+AHCYL1 | DJ-1 KD+AHCYL1 |
| 1st             | 59.64   | 60.93       | 61.01       | 21.14   | 38.62          | 42.50          |
| 2nd             | 45.56   | 47.33       | 46.42       | 17.31   | 39.52          | 37.50          |
| 3rd             | 58.20   | 59.83       | 63.92       | 23.56   | 47.03          | 40.22          |

Supplementary Figure 6e

| <i>PARK7</i> |         | Ctrl KD | AHCYL2<br>KD#1 | AHCYL2<br>KD#2 | DJ-1 KD | DJ-1<br>KD+AHC<br>YL2 | DJ-1<br>KD+AHC<br>YL2 |
|--------------|---------|---------|----------------|----------------|---------|-----------------------|-----------------------|
|              | 1st     | 1       | 1.02           | 0.96           | 0.11    | 0.18                  | 0.16                  |
|              | 2nd     | 1       | 1.17           | 0.94           | 0.14    | 0.19                  | 0.17                  |
|              | 3rd     | 1       | 1.10           | 1.09           | 0.20    | 0.15                  | 0.20                  |
|              | average | 1       | 1.09           | 1.00           | 0.15    | 0.17                  | 0.17                  |
|              | SD      | 0       | 0.07           | 0.08           | 0.04    | 0.02                  | 0.02                  |

| <i>AHCYL2</i> |         | Ctrl KD | AHCYL2<br>KD#1 | AHCYL2<br>KD#2 | DJ-1 KD | DJ-1<br>KD+AHC<br>YL2 | DJ-1<br>KD+AHC<br>YL2 |
|---------------|---------|---------|----------------|----------------|---------|-----------------------|-----------------------|
|               | 1st     | 1       | 0.33           | 0.22           | 0.89    | 0.35                  | 0.23                  |
|               | 2nd     | 1       | 0.22           | 0.28           | 1.03    | 0.33                  | 0.33                  |
|               | 3rd     | 1       | 0.27           | 0.21           | 0.96    | 0.33                  | 0.34                  |
|               | average | 1       | 0.27           | 0.24           | 0.96    | 0.34                  | 0.30                  |
|               | SD      | 0       | 0.06           | 0.04           | 0.07    | 0.01                  | 0.06                  |

Supplementary Figure 6f

| Lipid<br>ROS | DMSO    |                 |                |         |                            |                           |
|--------------|---------|-----------------|----------------|---------|----------------------------|---------------------------|
|              | Ctrl KD | AHCYL<br>2 KD#1 | AHCYL2<br>KD#2 | DJ-1 KD | DJ-1<br>KD+AHCY<br>L2 KD#1 | DJ-1<br>KD+AHCYL2<br>KD#2 |
| 1st          | 4.49    | 4               | 2.26           | 7.74    | 9.25                       | 11.51                     |
| 2nd          | 1.93    | 5.43            | 3.43           | 3.99    | 7.29                       | 8.23                      |
| 3rd          | 3.55    | 1.42            | 2.66           | 4.25    | 12.43                      | 10.36                     |
| Lipid<br>ROS | Erastin |                 |                |         |                            |                           |
|              | Ctrl KD | AHCYL<br>2 KD#1 | AHCYL2<br>KD#2 | DJ-1 KD | DJ-1<br>KD+AHCY<br>L2 KD#1 | DJ-1<br>KD+AHCYL2<br>KD#2 |
| 1st          | 21.85   | 22.09           | 16.13          | 49.82   | 48.82                      | 45.31                     |
| 2nd          | 18.19   | 25.09           | 17.1           | 43.41   | 54.38                      | 45.17                     |
| 3rd          | 18.16   | 23.75           | 20.37          | 42.65   | 52.99                      | 45.51                     |

**Supplementary Figure 6g**

| Cell Viability%   | Ctrl KD |       |       | AHCYL2 KD#1         |       |       | AHCYL2 KD#2         |       |       |
|-------------------|---------|-------|-------|---------------------|-------|-------|---------------------|-------|-------|
| Erastin( $\mu$ M) | 1st     | 2nd   | 3rd   | 1st                 | 2nd   | 3rd   | 1st                 | 2nd   | 3rd   |
| 0.0               | 100.0   | 100.0 | 100.0 | 100.0               | 100.0 | 100.0 | 100.0               | 100.0 | 100.0 |
| 1.0               | 97.1    | 88.7  | 88.2  | 99.8                | 87.3  | 87.5  | 75.7                | 82.9  | 88.7  |
| 2.0               | 73.4    | 66.7  | 59.5  | 76.4                | 78.0  | 63.0  | 63.0                | 75.4  | 62.0  |
| 4.0               | 49.7    | 50.2  | 48.4  | 50.8                | 49.6  | 55.1  | 43.4                | 47.3  | 49.8  |
| Cell Viability%   | DJ-1 KD |       |       | DJ-1 KD+AHCYL2 KD#1 |       |       | DJ-1 KD+AHCYL2 KD#2 |       |       |
| Erastin( $\mu$ M) | 1st     | 2nd   | 3rd   | 1st                 | 2nd   | 3rd   | 1st                 | 2nd   | 3rd   |
| 0.0               | 100.0   | 100.0 | 100.0 | 100.0               | 100.0 | 100.0 | 100.0               | 100.0 | 100.0 |
| 1.0               | 63.2    | 66.3  | 72.5  | 67.7                | 73.3  | 73.5  | 59.0                | 67.4  | 74.0  |
| 2.0               | 46.4    | 42.0  | 43.8  | 33.6                | 40.3  | 41.4  | 47.6                | 36.6  | 52.5  |
| 4.0               | 24.0    | 26.6  | 23.8  | 21.0                | 14.6  | 29.9  | 13.1                | 24.5  | 30.1  |

**Supplementary Figure 7a**

| weight      |         |            |           |           |
|-------------|---------|------------|-----------|-----------|
|             | Vehicle |            | PE        |           |
|             | Ctrl KD | DJ-1 KD    | Ctrl KD   | DJ-1 KD   |
| 1           | 1.42    | 1.17       | 0.95      | 0.43      |
| 2           | 0.94    | 1.71       | 1.19      | 0.58      |
| 3           | 1.75    | 0.55       | 0.68      | 0.47      |
| 4           | 0.50    | 0.70       | 0.30      | 0.74      |
| 5           | 1.42    | 0.70       | 2.39      | 1.44      |
| 6           | 1.09    | 2.47       | 0.91      | 0.22      |
| average     | 1.19    | 1.22       | 1.07      | 0.65      |
| SEM         | 0.18    | 0.30       | 0.29      | 0.17      |
| inhibition% |         | -2.7111692 | 9.6211387 | 45.485833 |

| day 16 RTV |         |         |         |         |
|------------|---------|---------|---------|---------|
|            | Vehicle |         | PE      |         |
|            | Ctrl KD | DJ-1 KD | Ctrl KD | DJ-1 KD |
| 1          | 16.52   | 11.08   | 18.98   | 4.51    |
| 2          | 19.19   | 7.10    | 11.39   | 5.10    |
| 3          | 9.92    | 20.11   | 25.52   | 6.92    |
| 4          | 18.67   | 9.88    | 13.92   | 6.14    |
| 5          | 12.86   | 10.32   | 27.54   | 6.30    |
| 6          | 15.11   | 18.89   | 11.20   | 3.84    |
| average    | 15.38   | 12.90   | 18.09   | 5.47    |
| T/C        | -       | 0.84    | 1.18    | 0.36    |

**Supplementary Figure 7b**

| Ki67 % |         |         |         |         |
|--------|---------|---------|---------|---------|
|        | Vehicle |         | PE      |         |
|        | Ctrl KD | DJ-1 KD | Ctrl KD | DJ-1 KD |
| 1      | 60.91   | 55.48   | 64.03   | 59.71   |
| 2      | 52.36   | 58.84   | 51.17   | 58.19   |
| 3      | 58.10   | 51.87   | 55.16   | 62.71   |
| 4      | 70.16   | 48.74   | 57.14   | 60.91   |
| 5      | 56.06   | 66.00   | 53.82   | 52.07   |
| 6      | 55.00   | 55.93   | 50.25   | 53.43   |

**Supplementary Figure7c**

| tunel % |         |         |         |         |                  |
|---------|---------|---------|---------|---------|------------------|
|         | Vehicle |         | PE      |         | positive<br>ctrl |
|         | Ctrl KD | DJ-1 KD | Ctrl KD | DJ-1 KD |                  |
| 1       | 0.91    | 0.78    | 2.41    | 3.33    | 31.90            |
| 2       | 1.24    | 5.20    | 5.08    | 0.86    | 38.10            |
| 3       | 4.34    | 4.47    | 2.29    | 2.62    | 22.14            |
| 4       | 2.71    | 3.34    | 2.94    | 2.65    |                  |
| 5       | 1.09    | 1.42    | 4.62    | 5.07    |                  |
| 6       | 3.40    | 1.45    | 2.37    | 1.79    |                  |
